# Supplementary material for: Lemon juice mediated multicomponent reactions for the synthesis of fused imidazoles
Source: Royal Society of Chemistry journal article supplement (doi:10.1039/c8nj03480j), 2018-01-01
Supplement: c8nj03480j1.pdf [file c8nj03480j1.pdf]

**Supplementary Material**

# Lemon juice mediated multicomponent reactions for the synthesis of fused imidazoles

Argha Saha, Asim Jana and Lokman H. Choudhury\*

*Department of Chemistry, Indian Institute of Technology Patna, Bihta, Patna-801103*

---

**Table of contents:**

1. Copies of  $^1\text{H}$  and  $^{13}\text{C}$  NMR spectra of compounds.....S2-S36
3. Crystal structure description of **4b**.....S37-S47

Copies of  $^1\text{H}$  and  $^{13}\text{C}$  NMR spectra of compounds

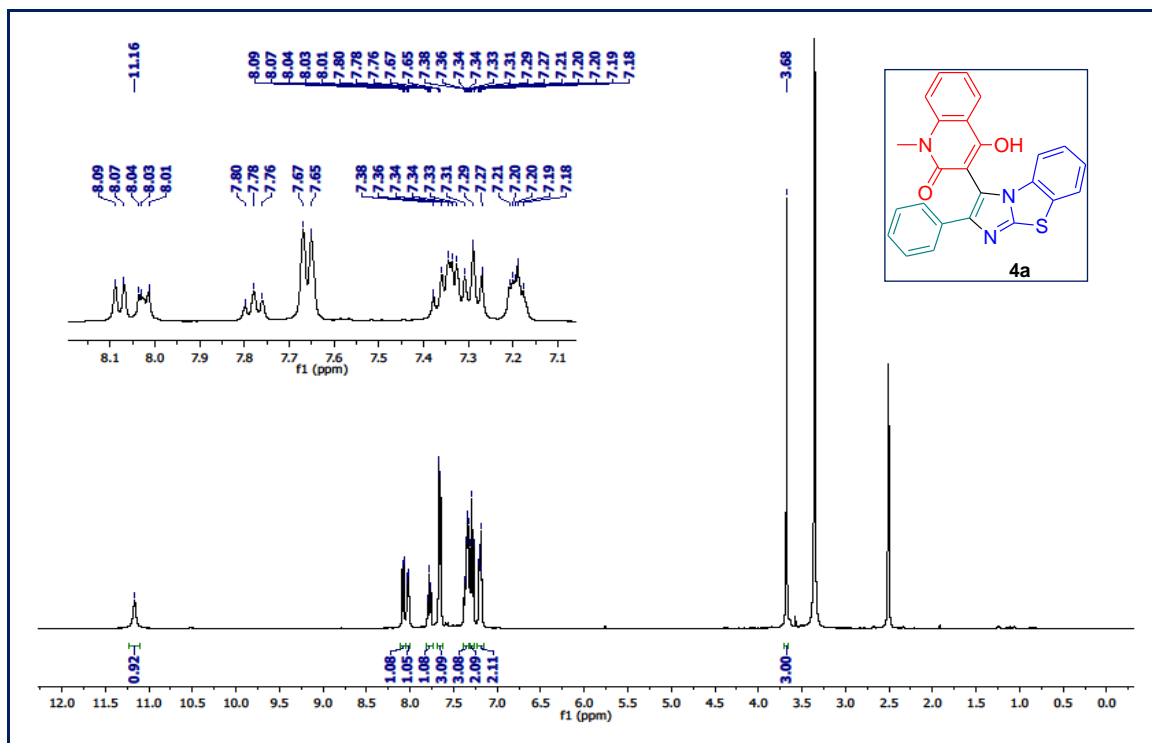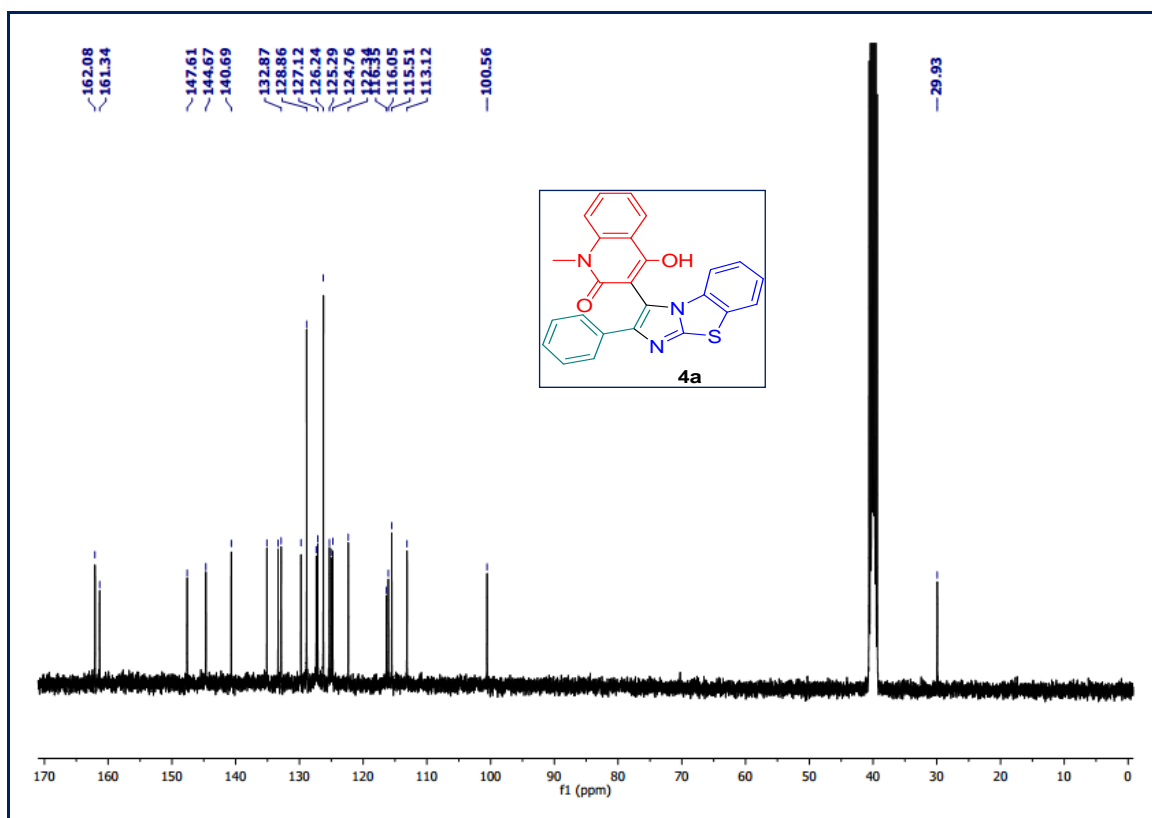

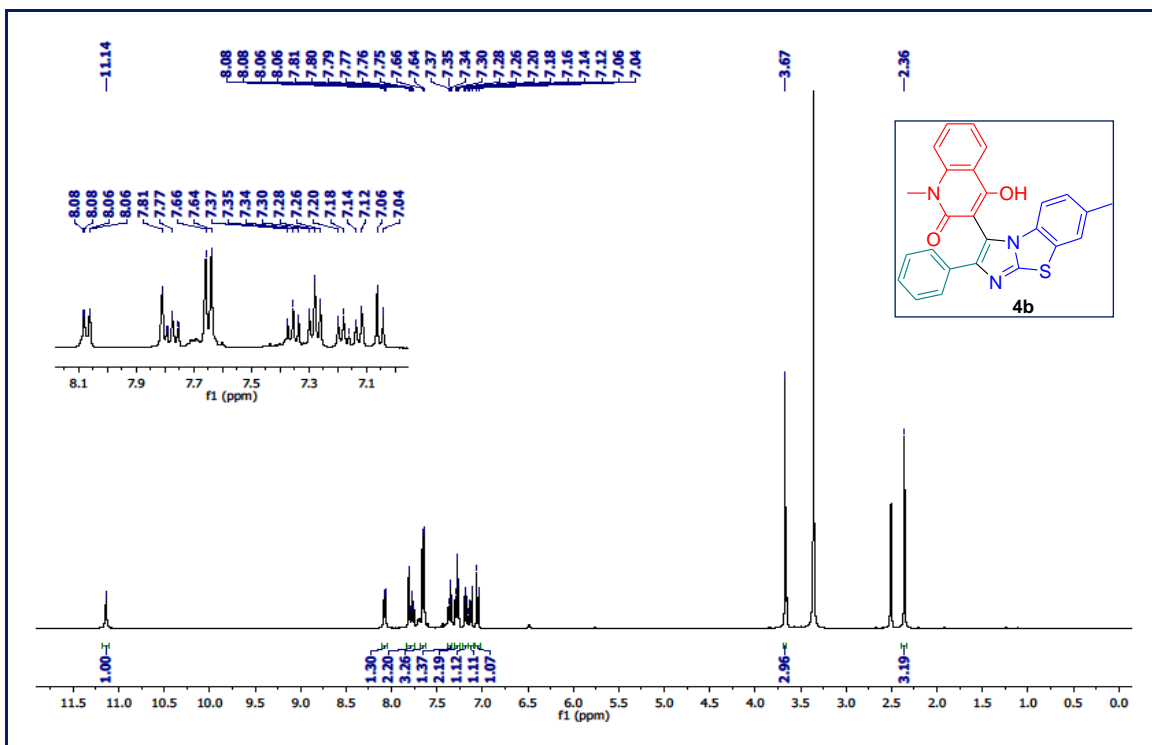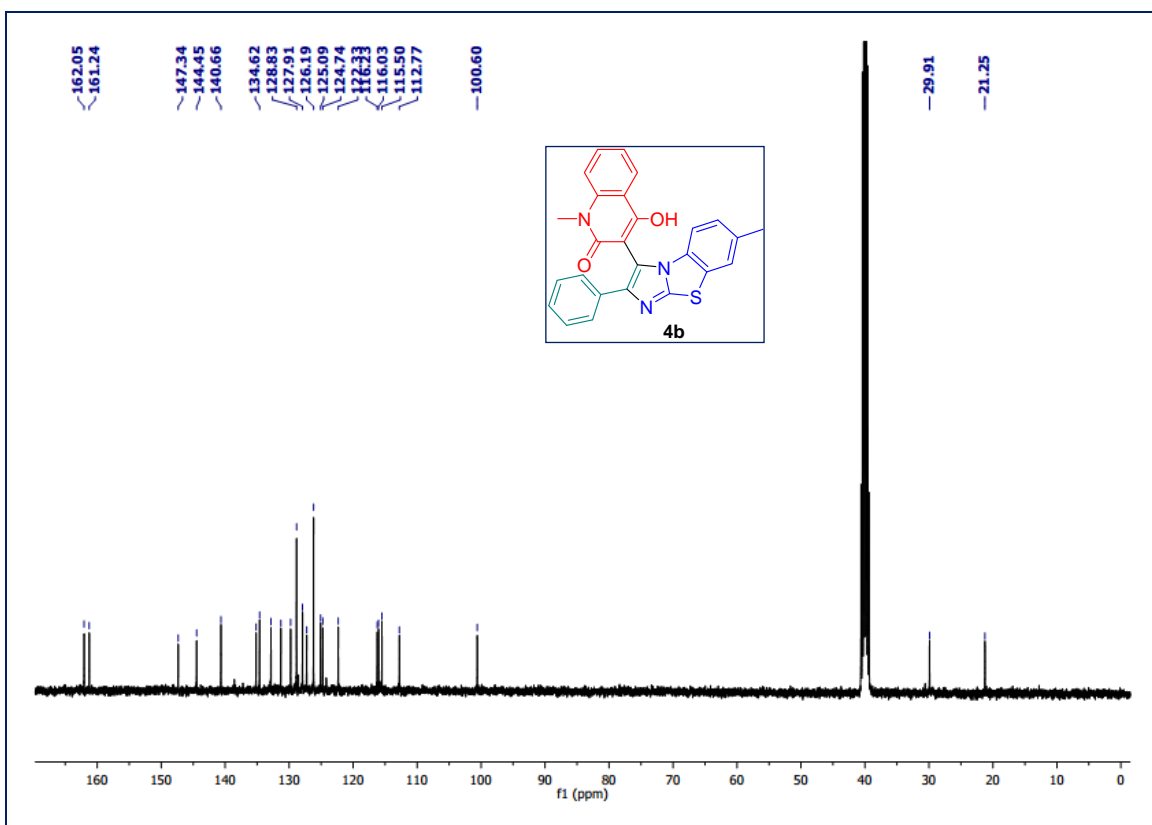

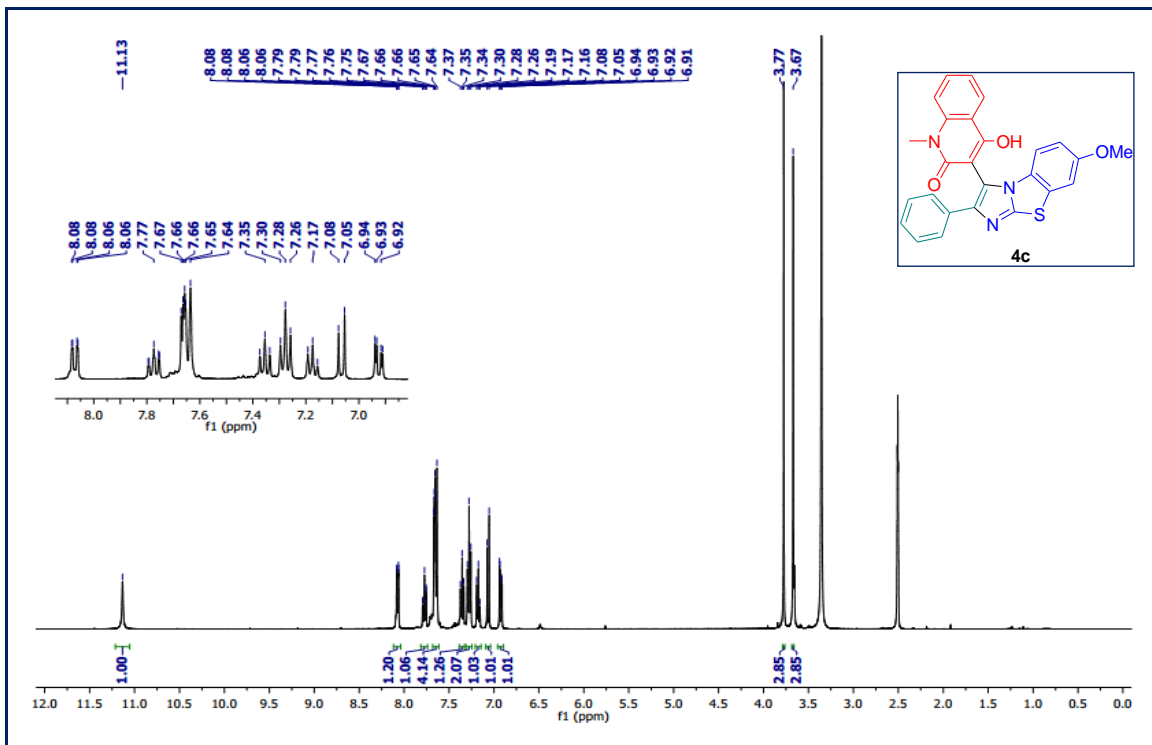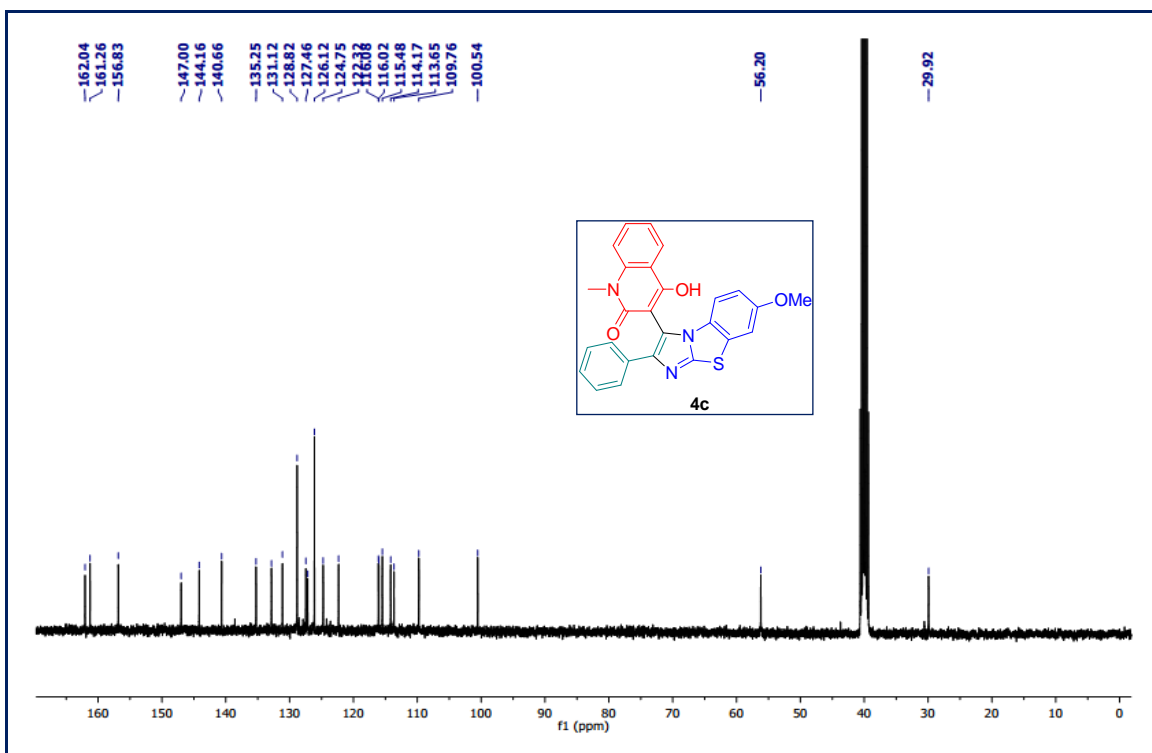

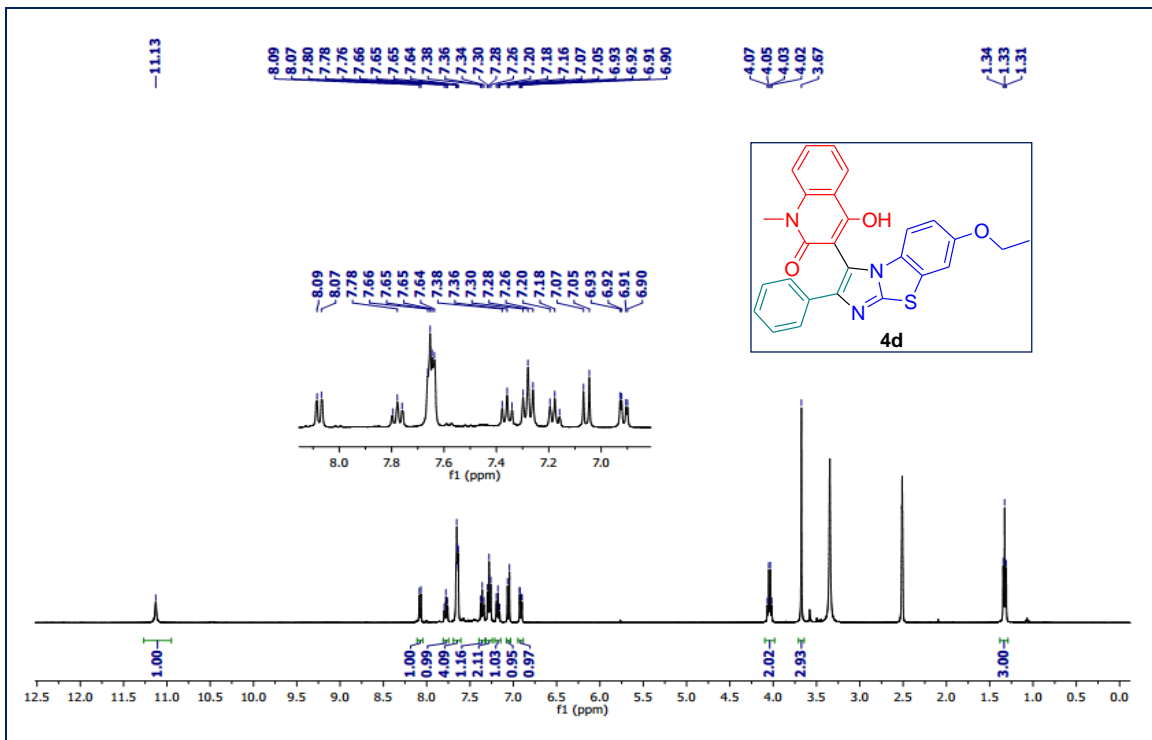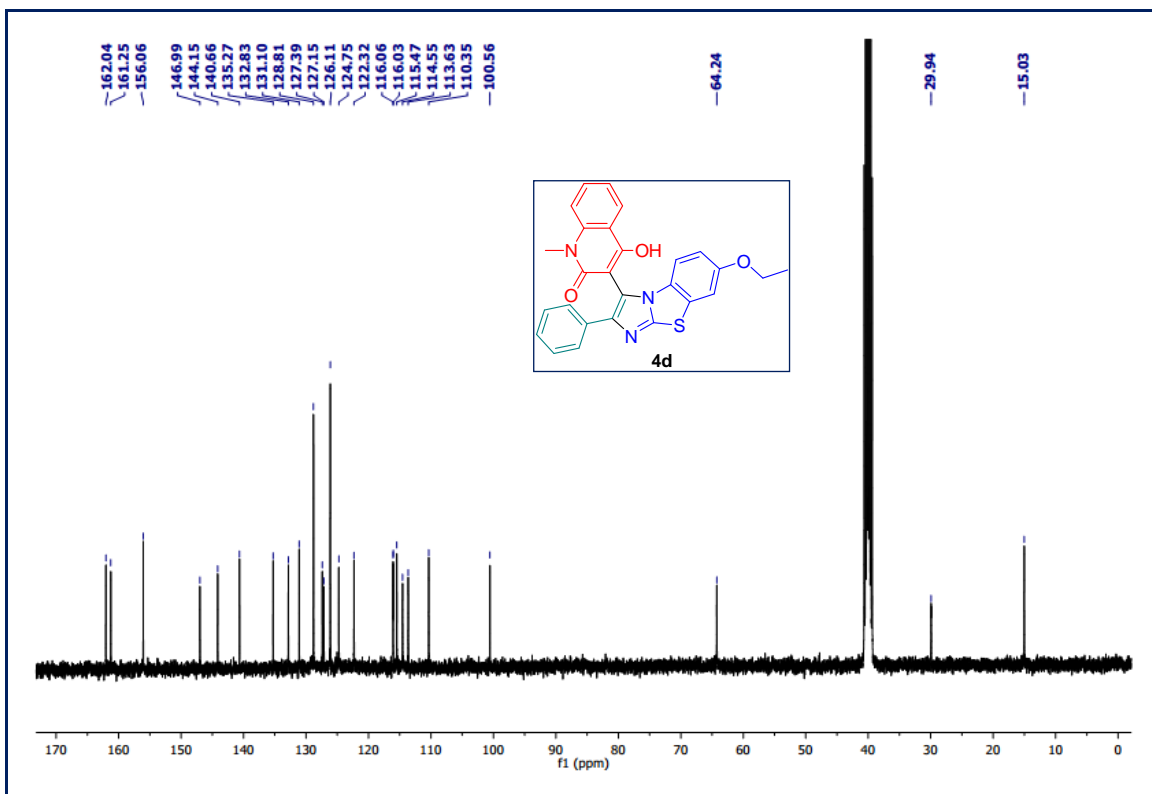

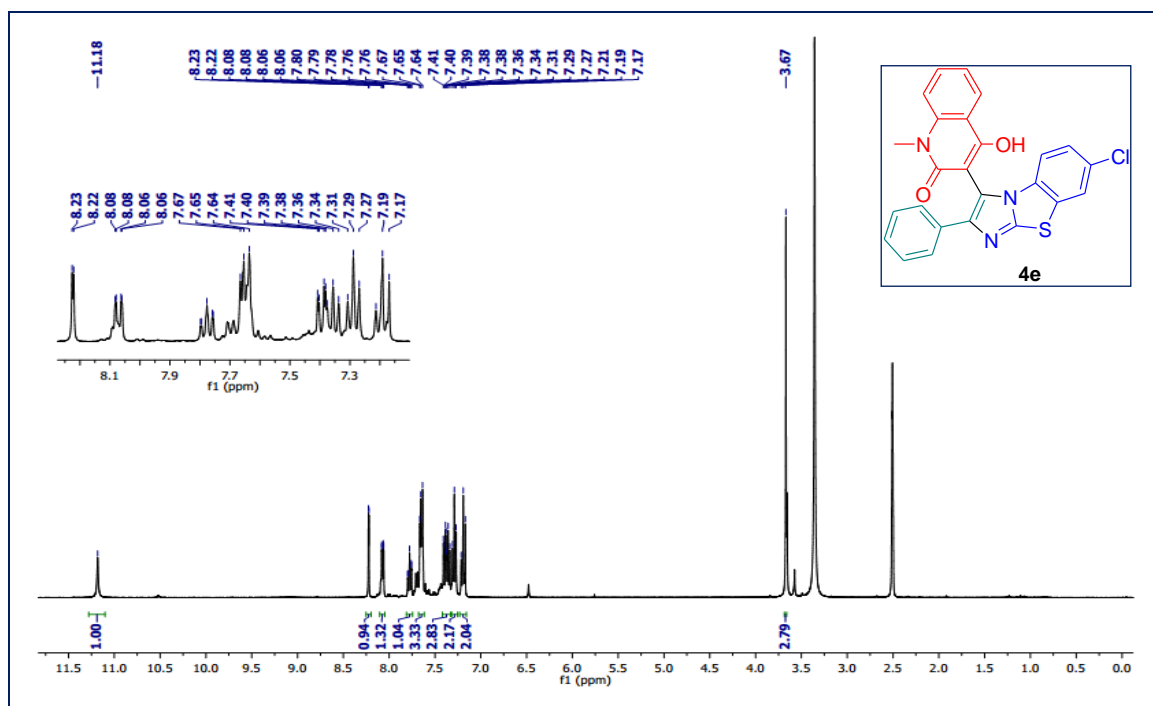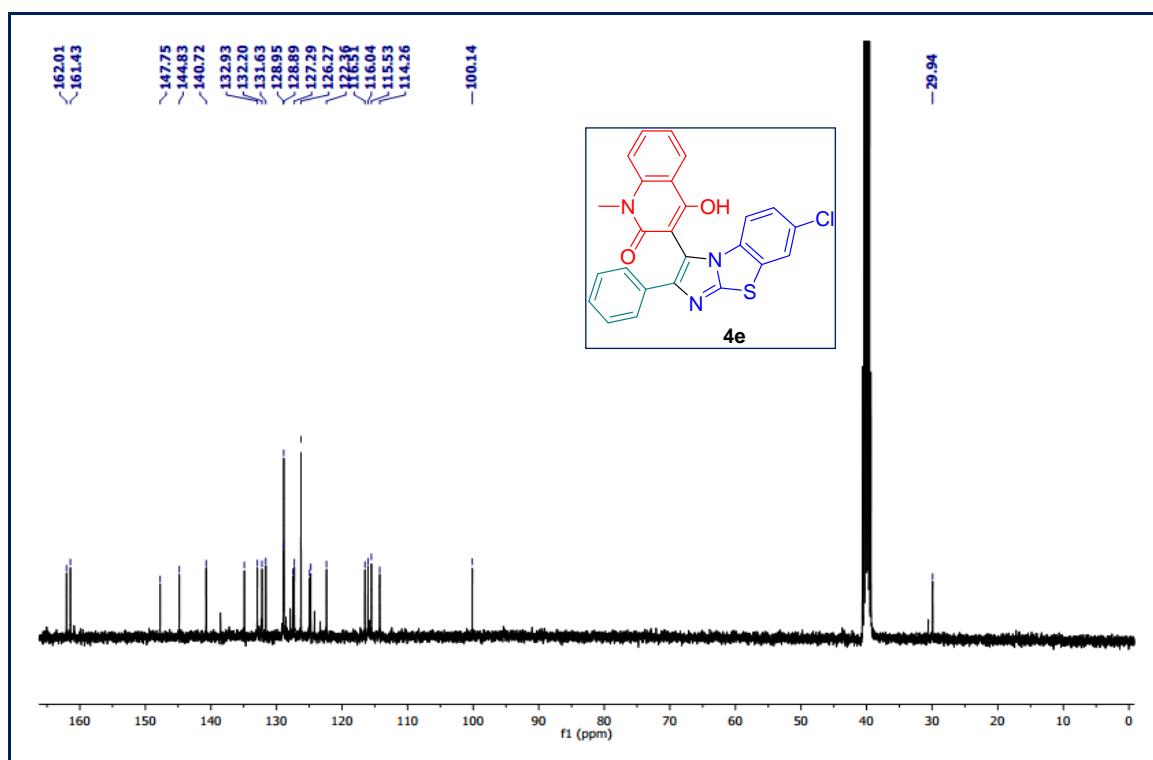

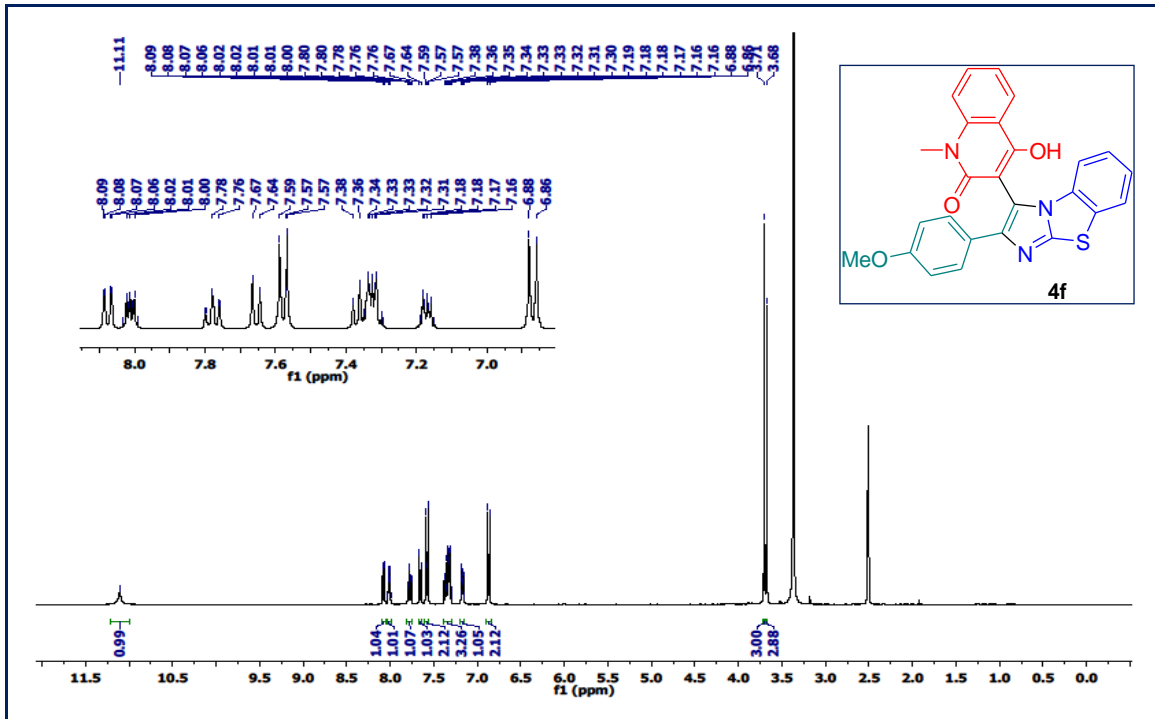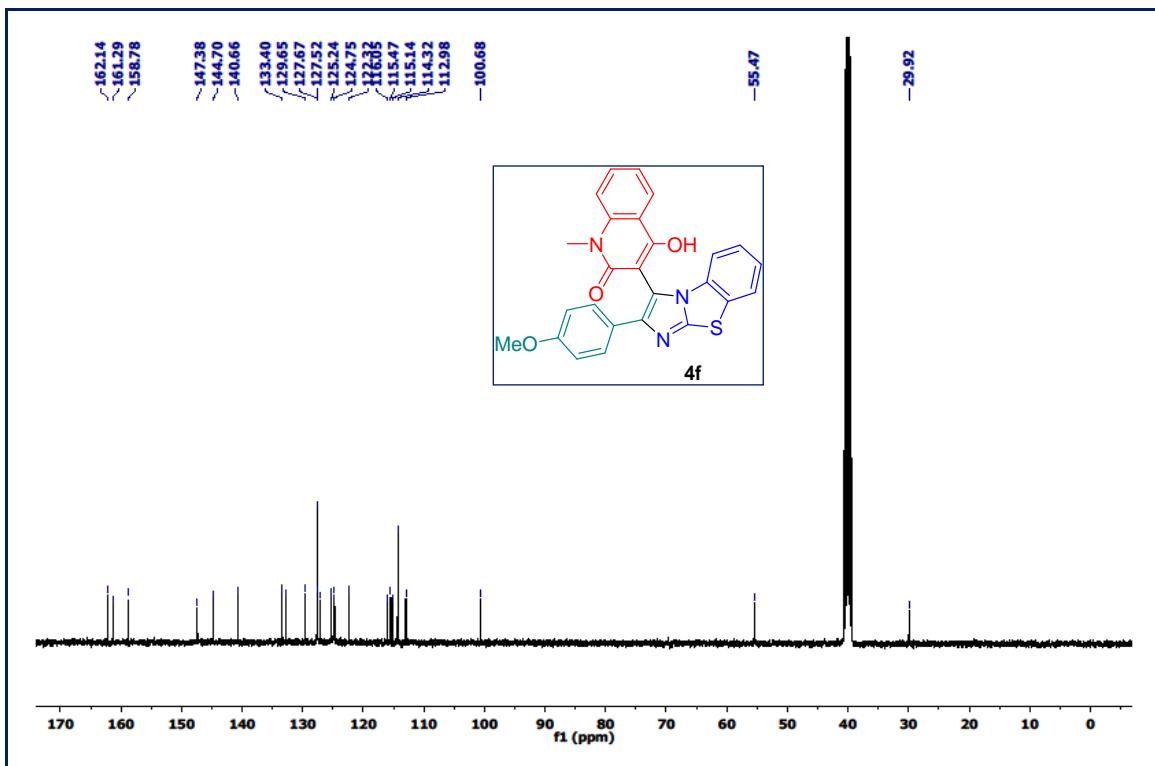

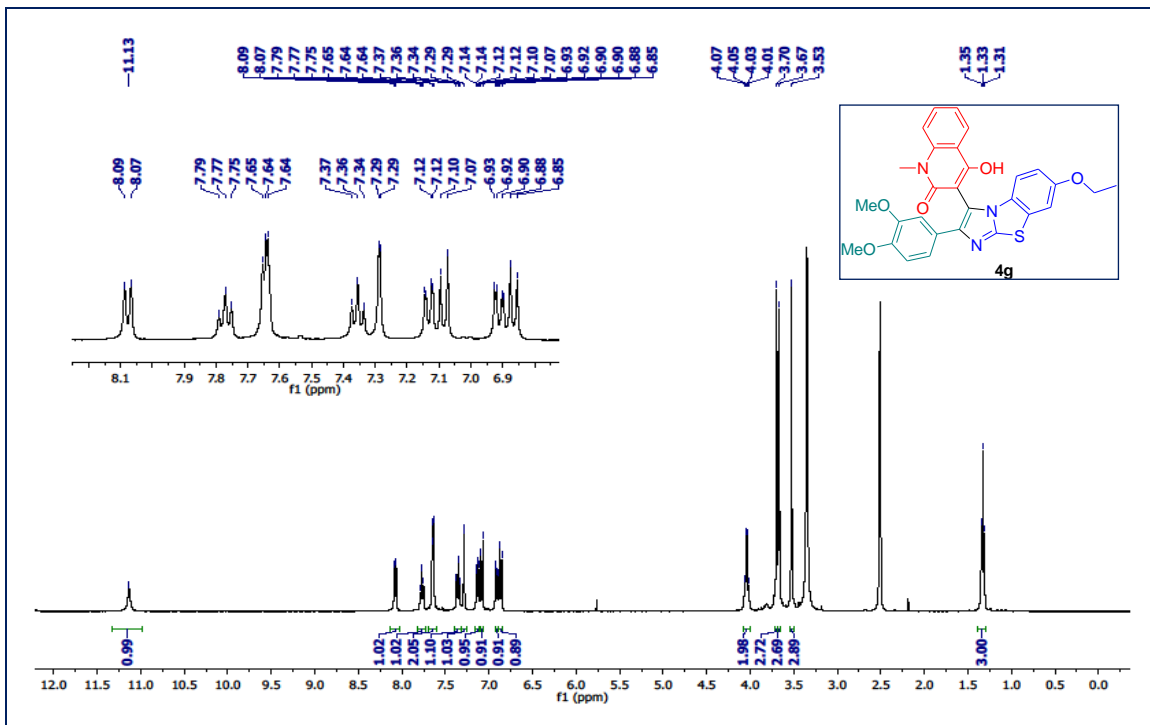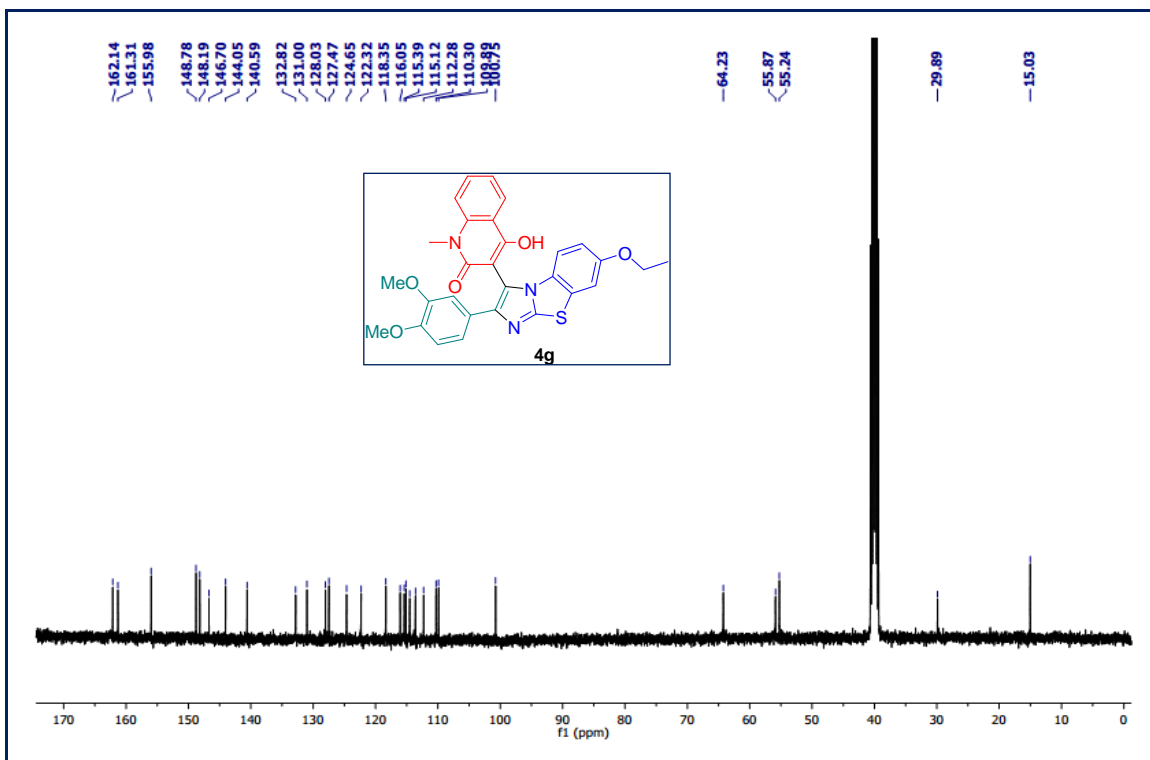



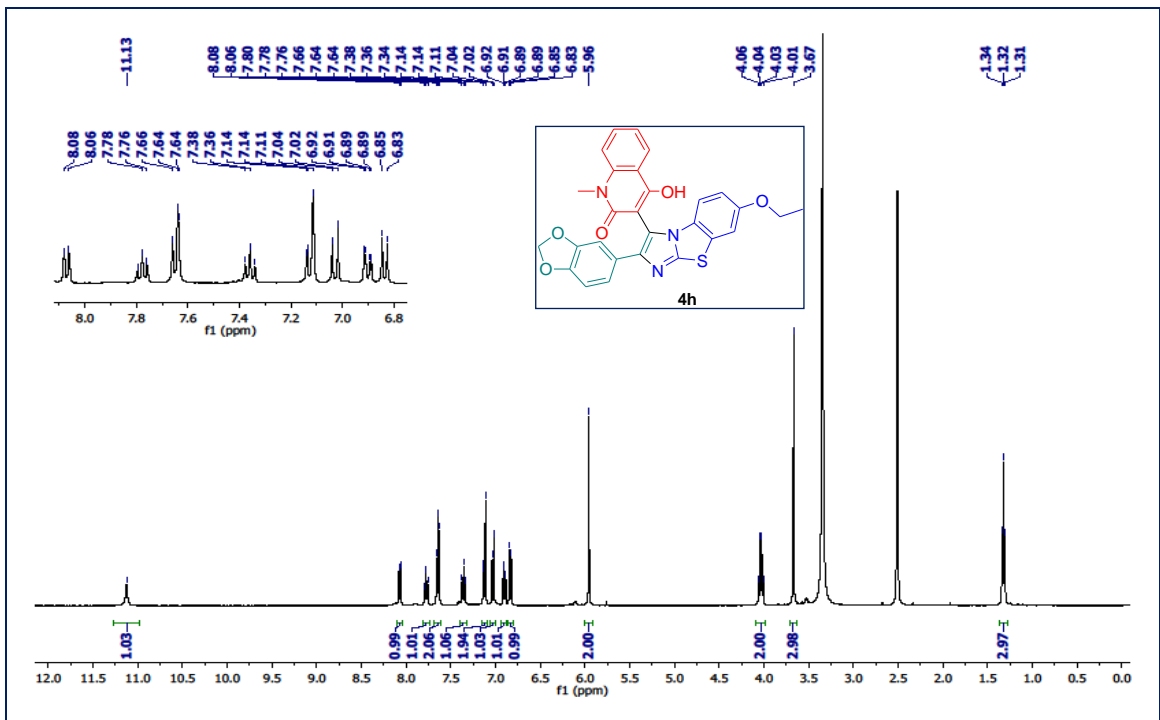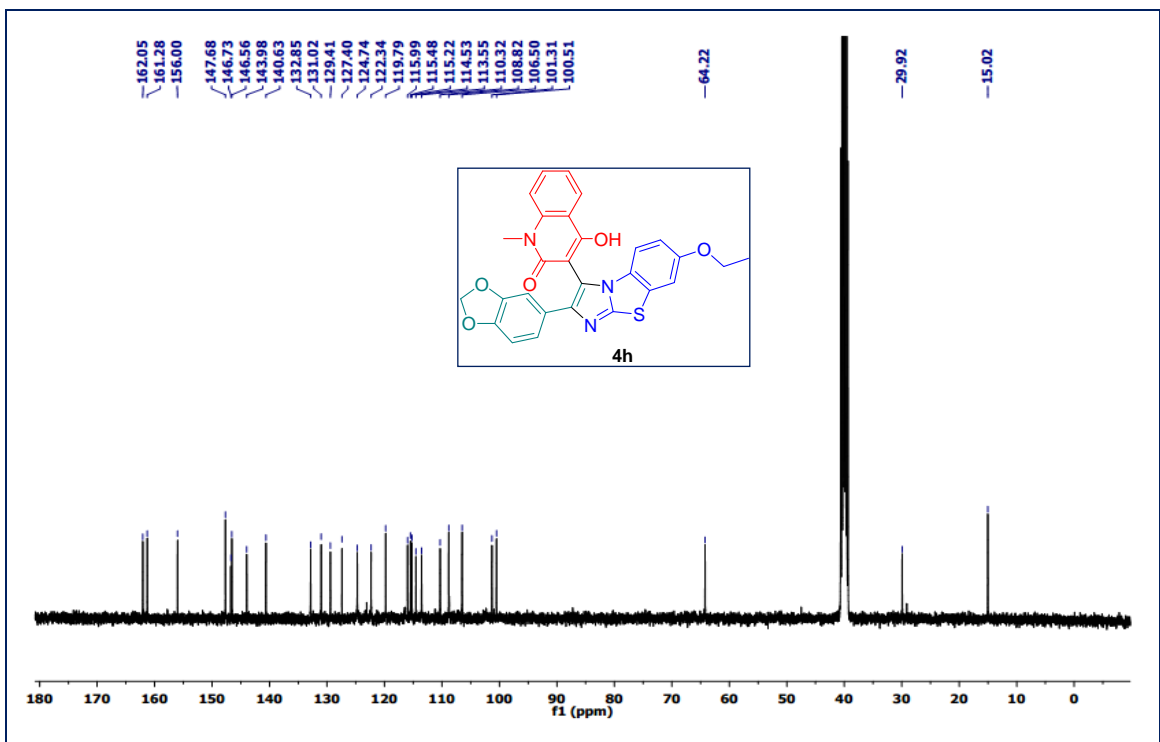

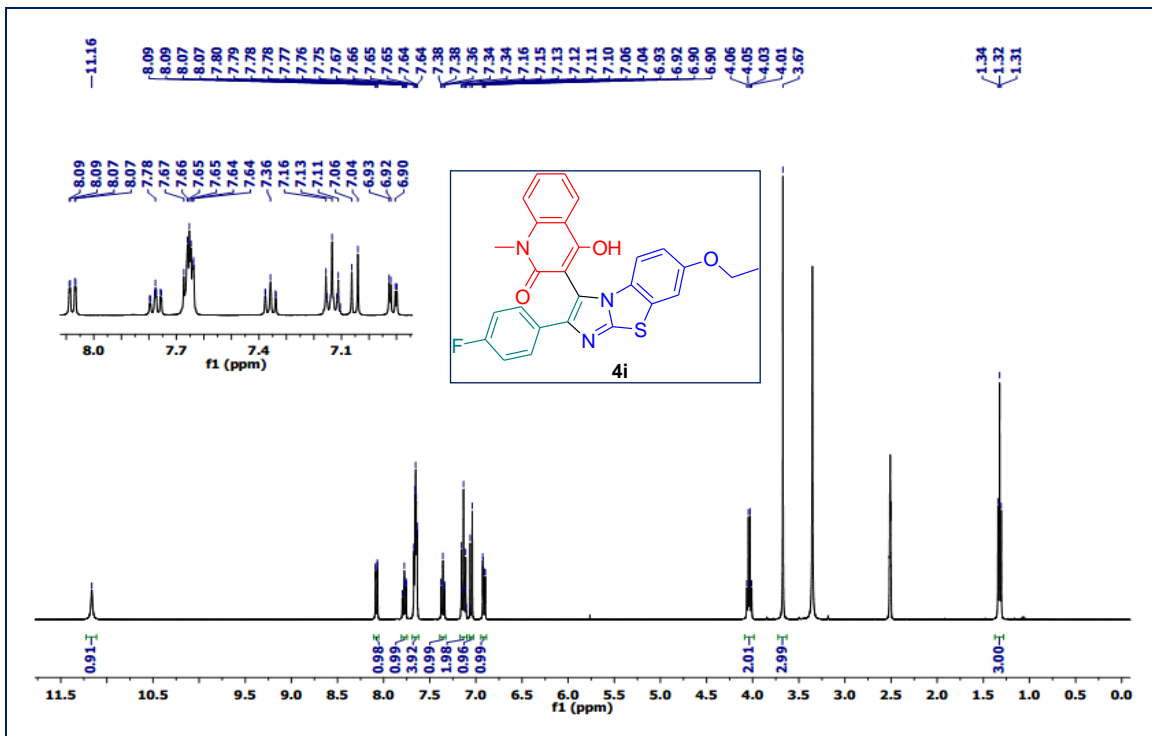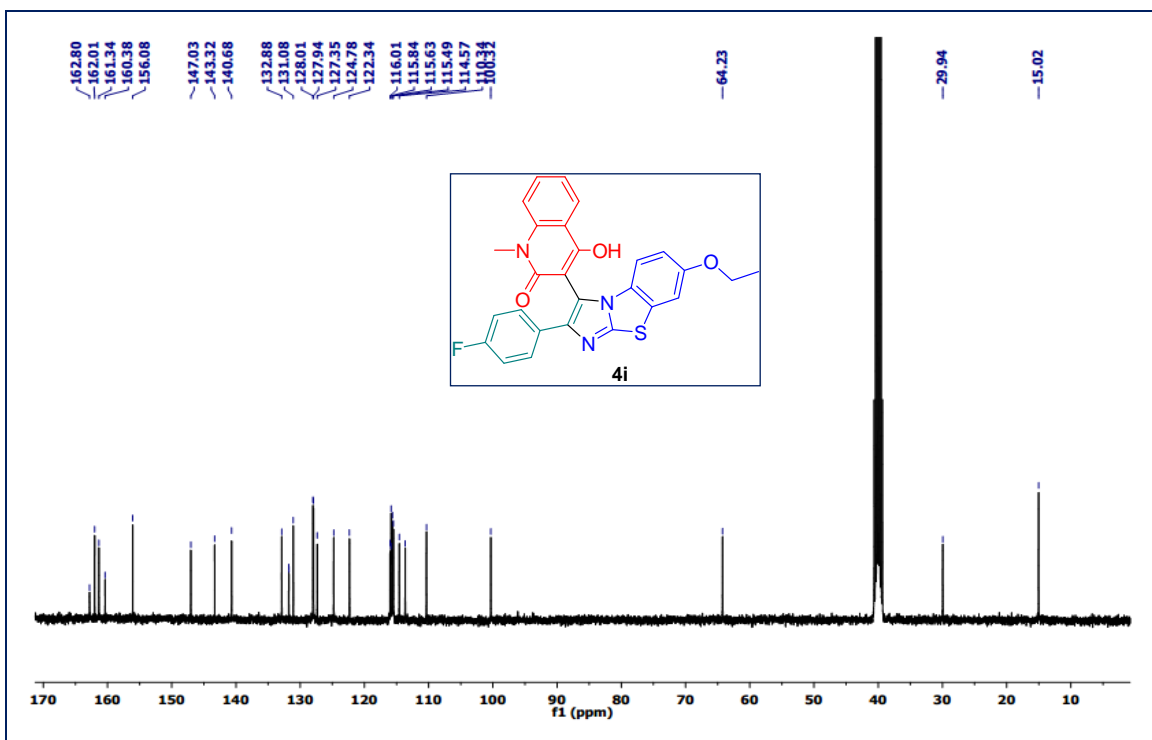

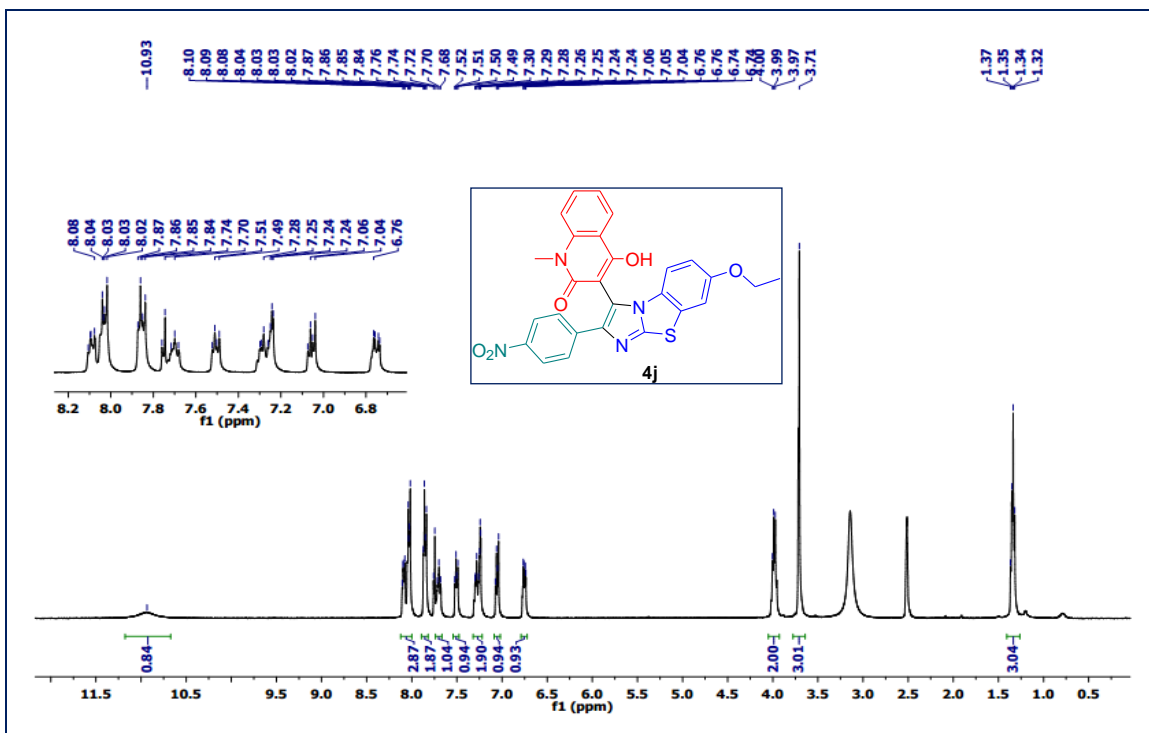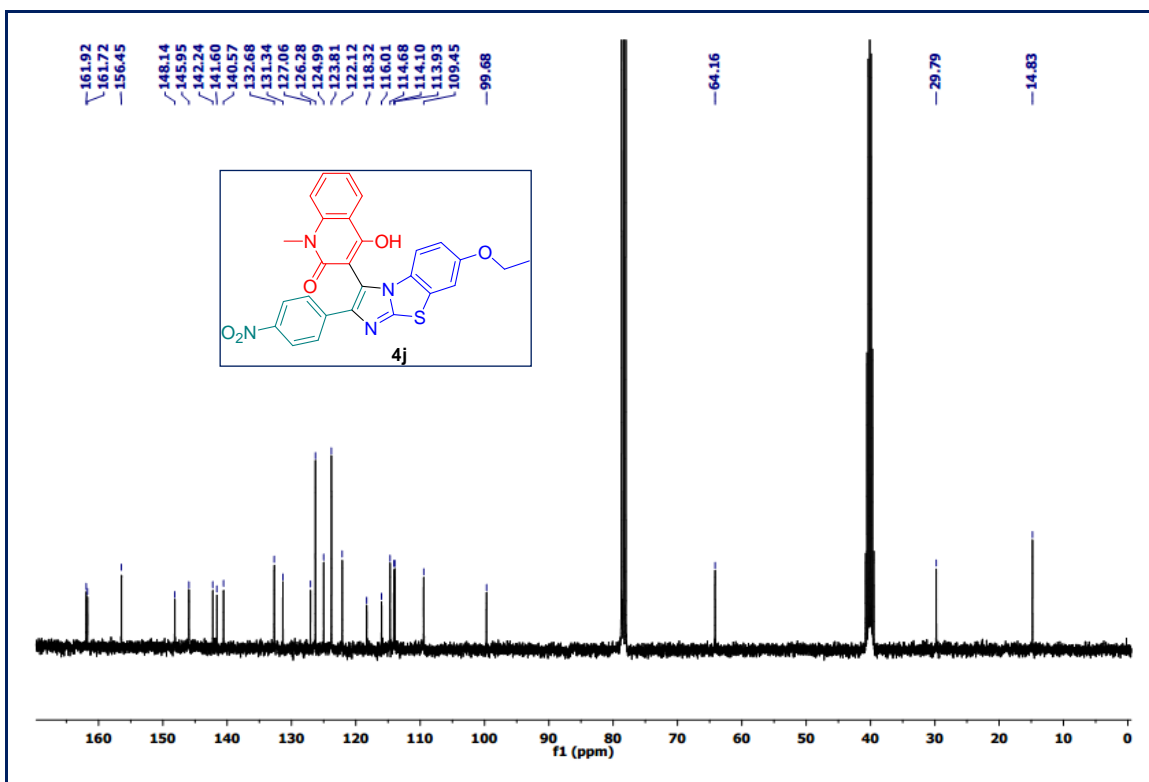

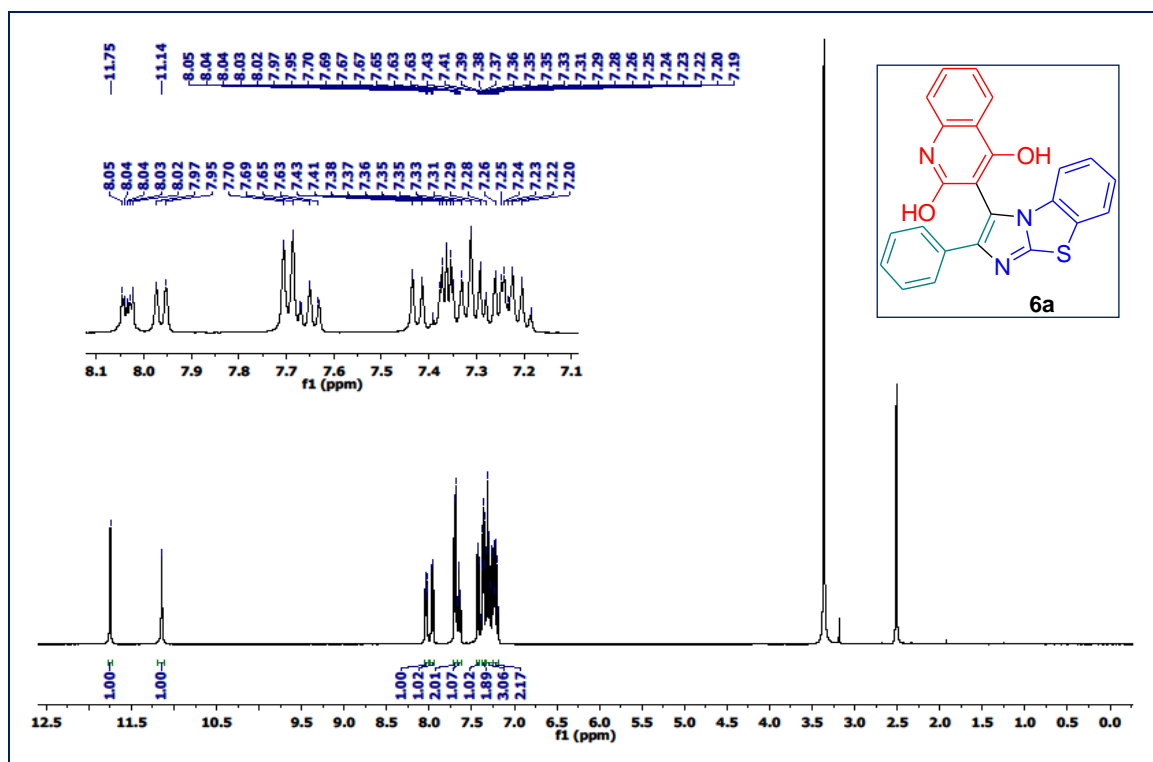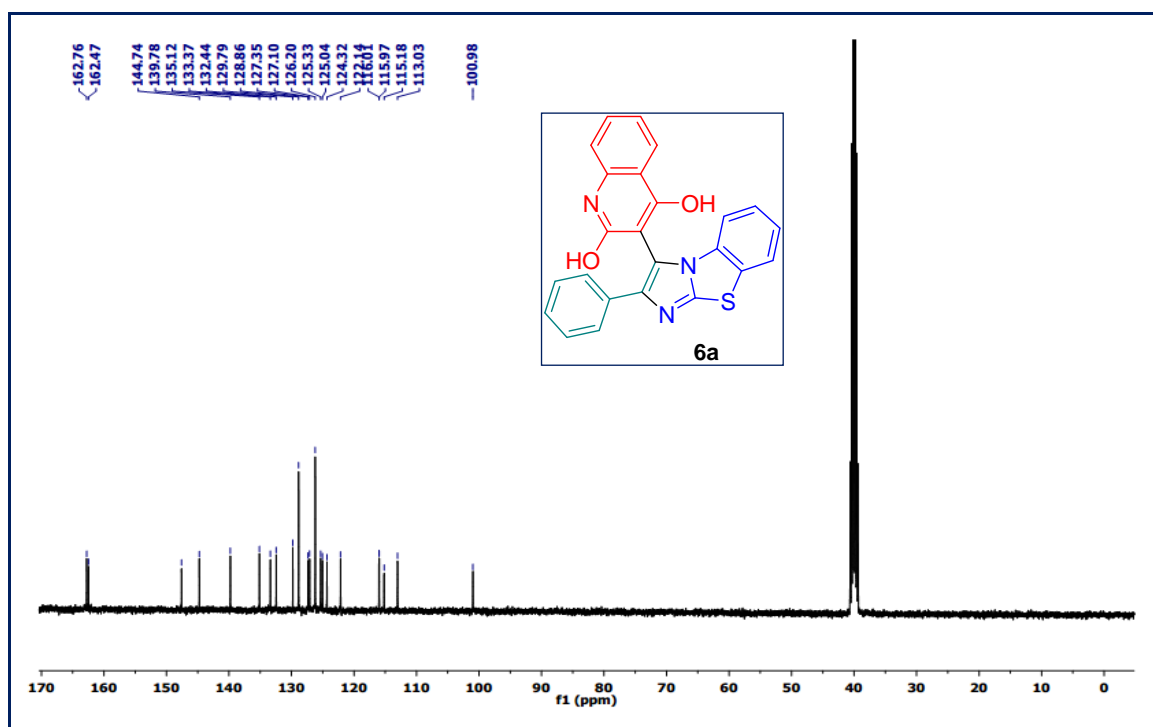

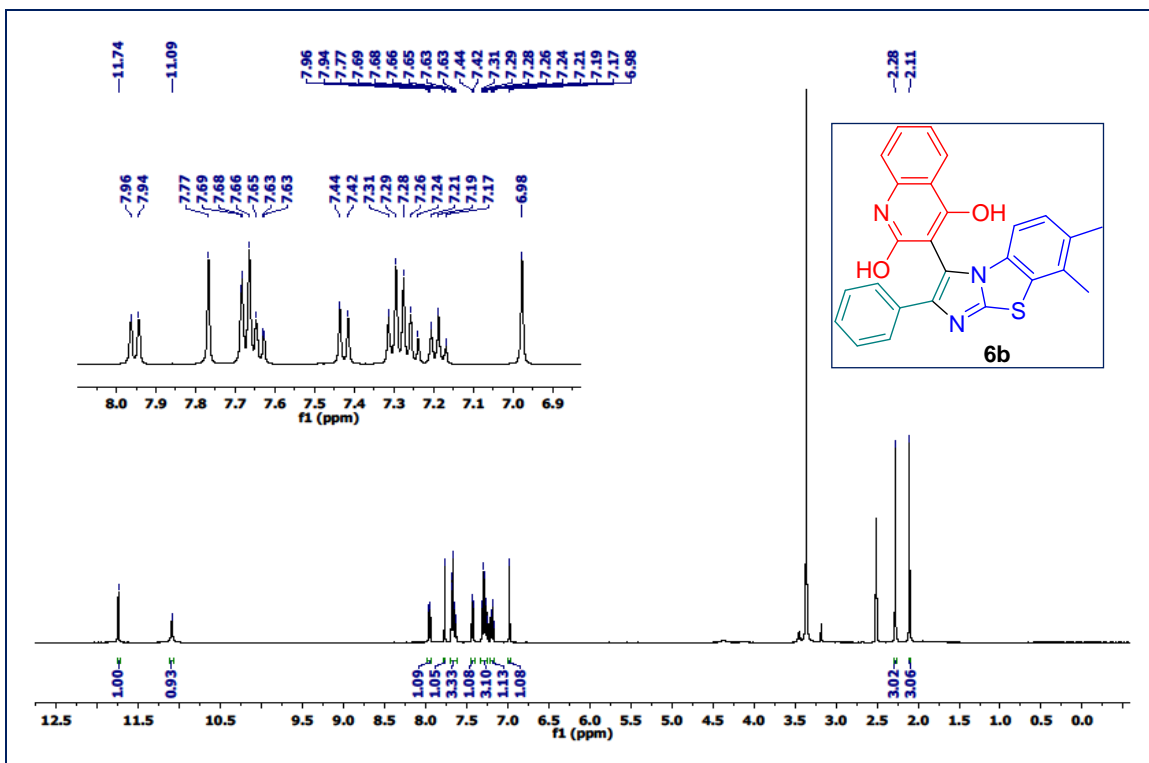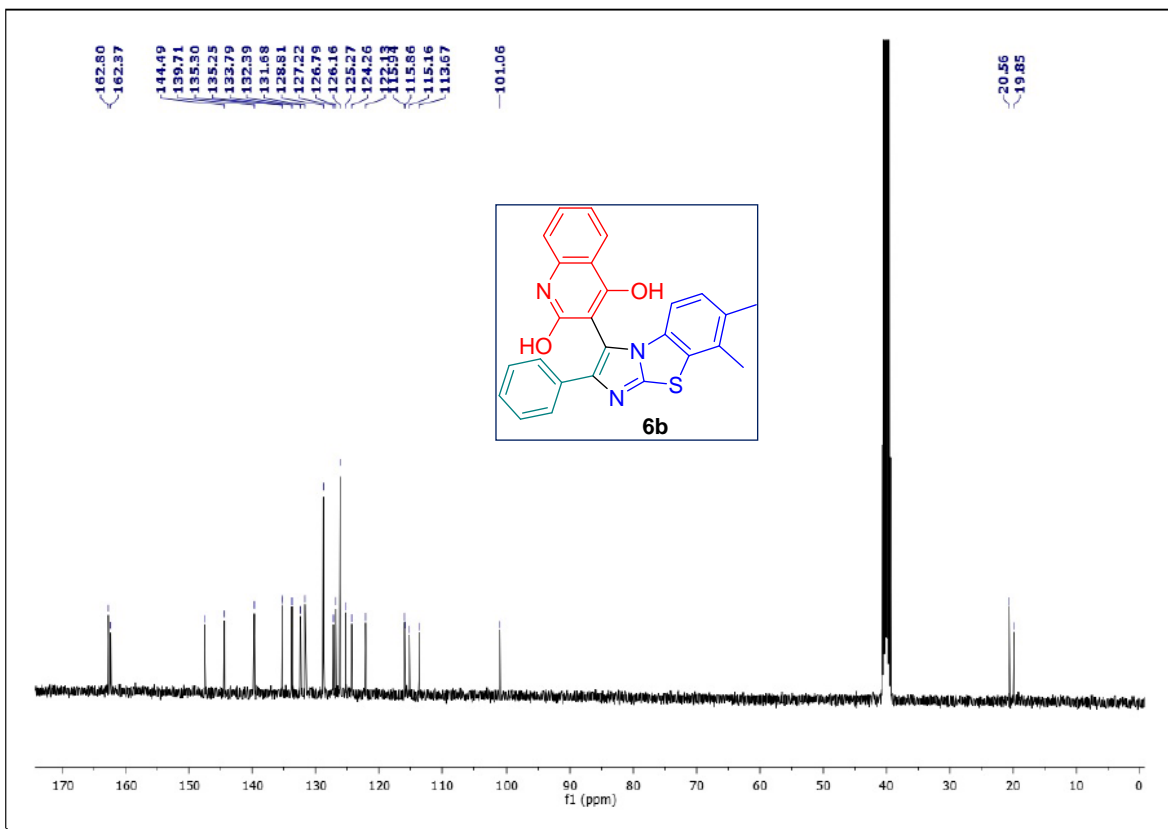

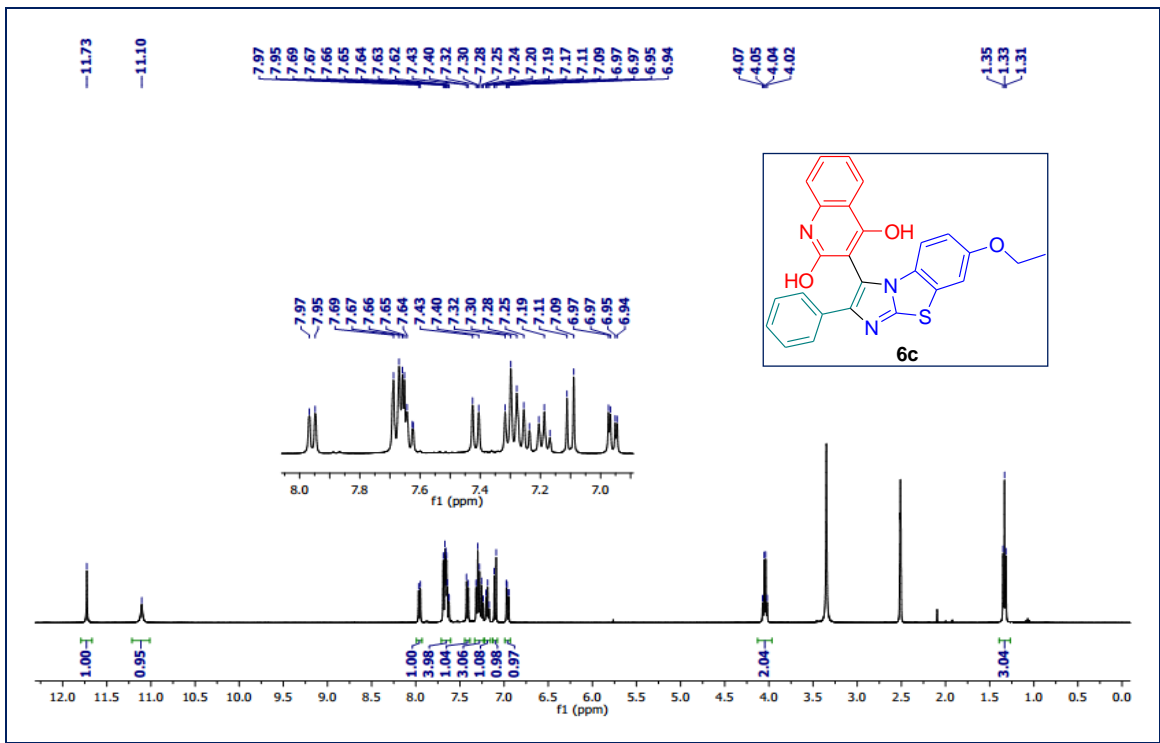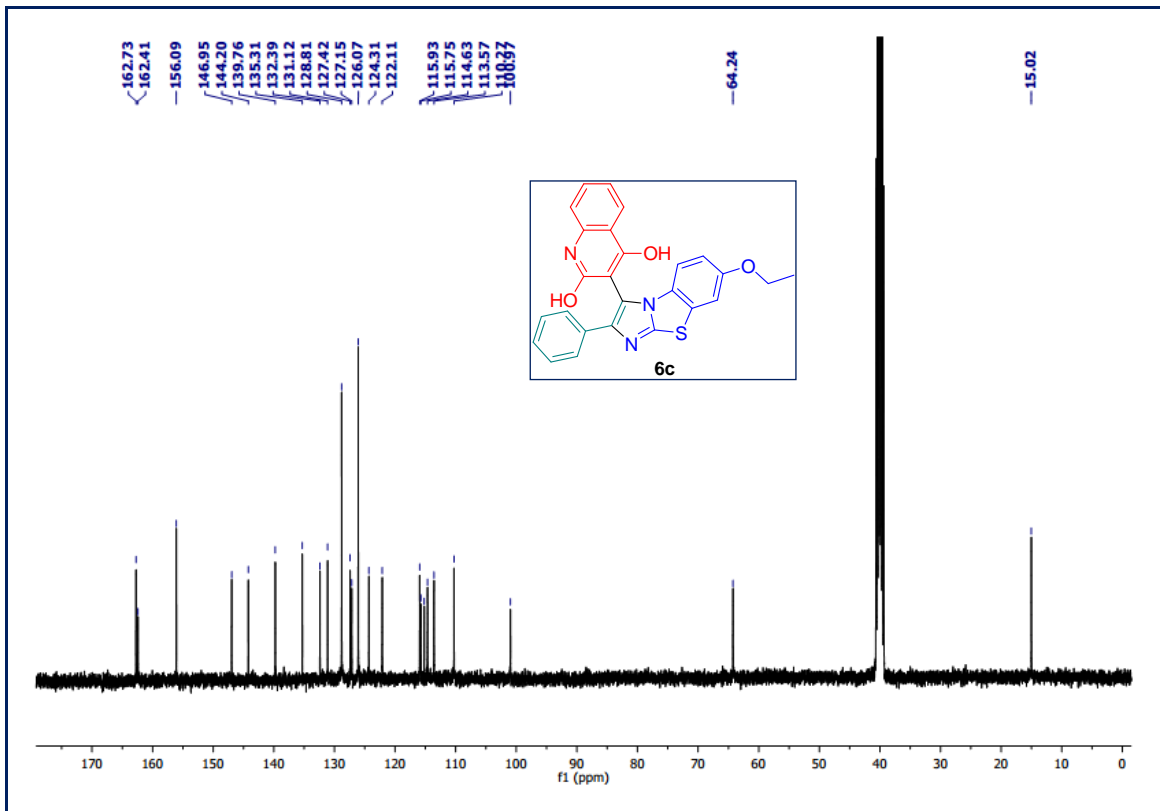

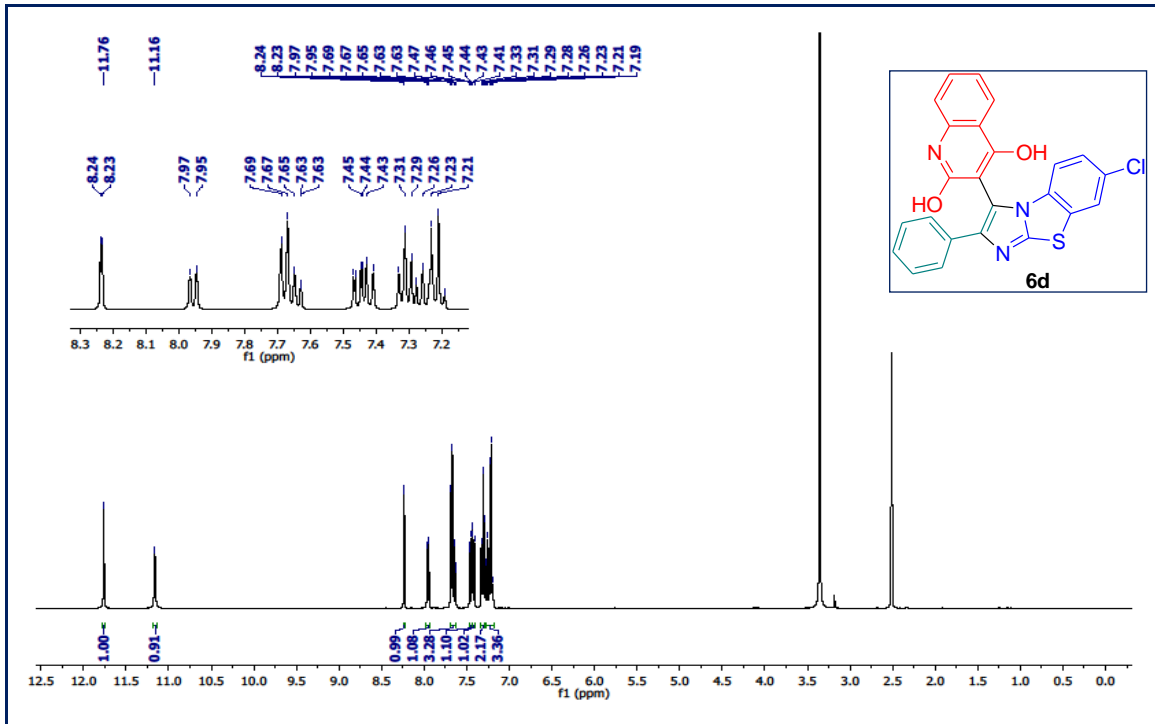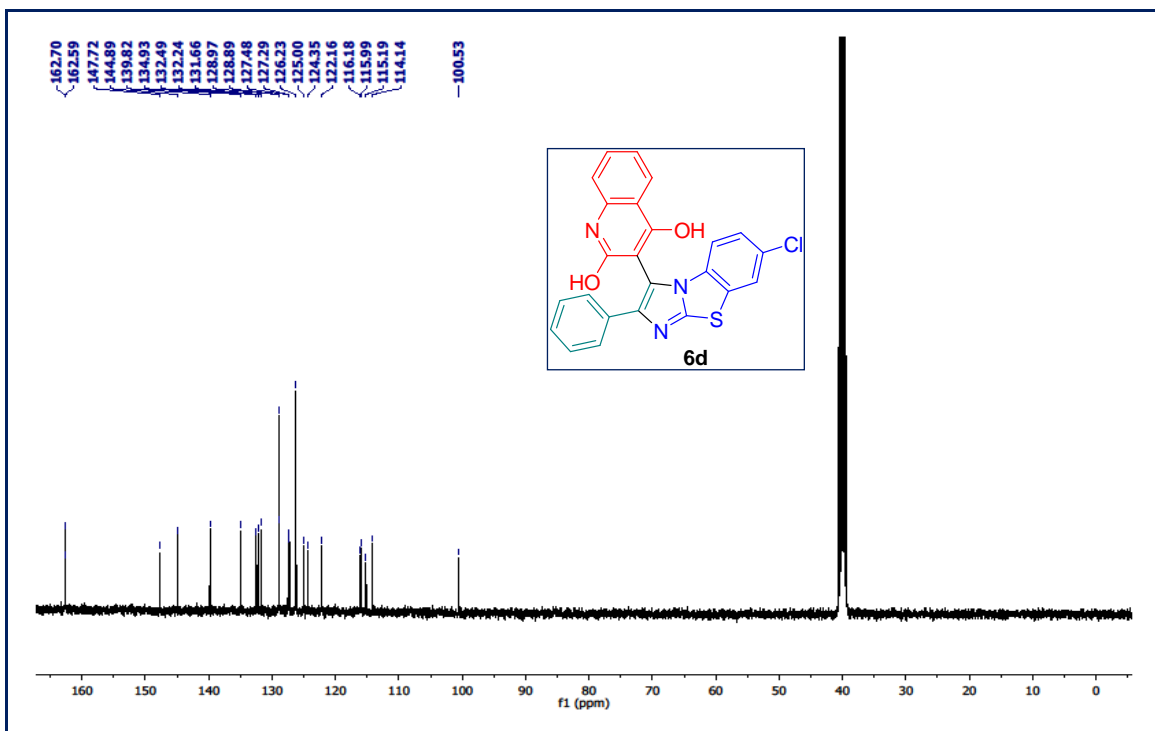

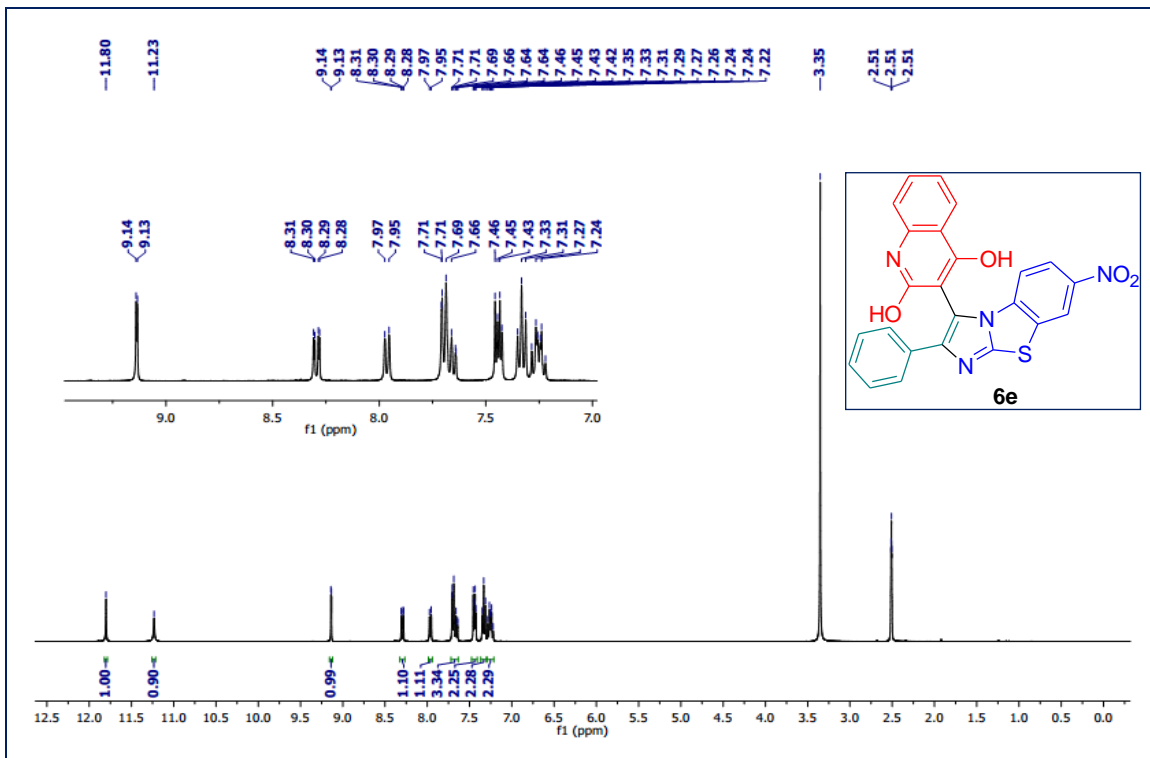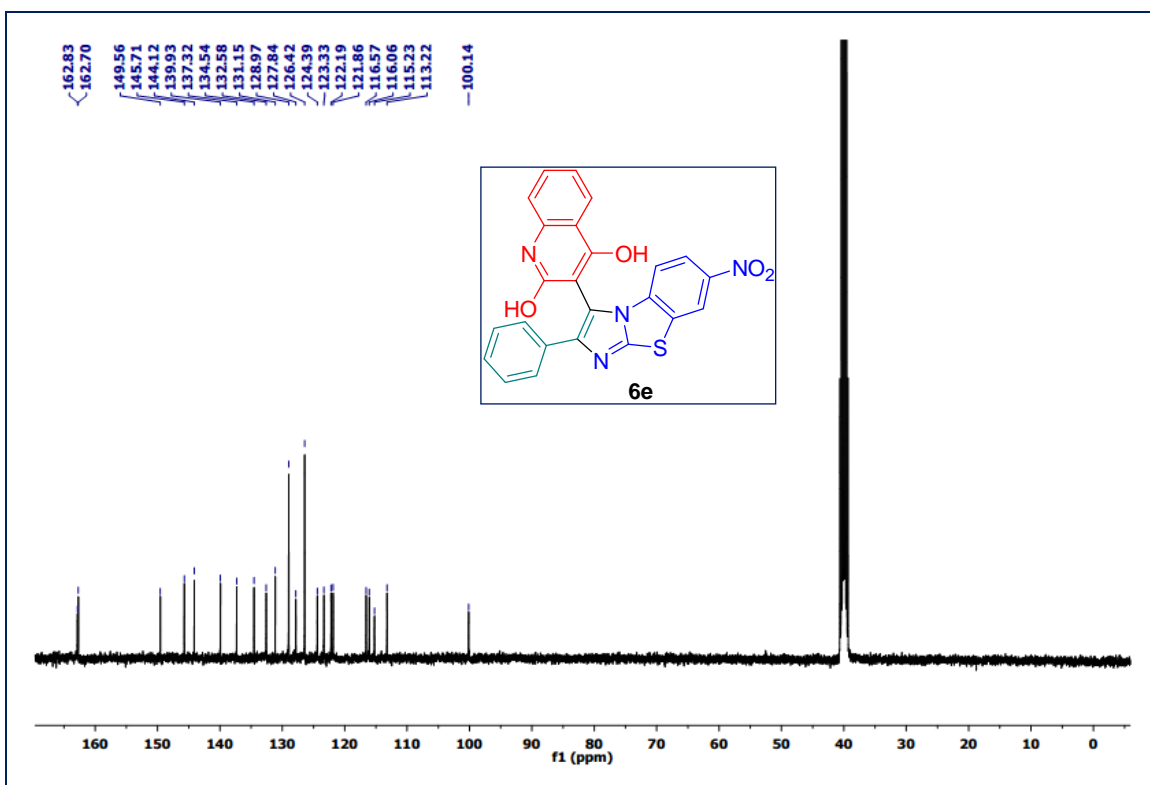



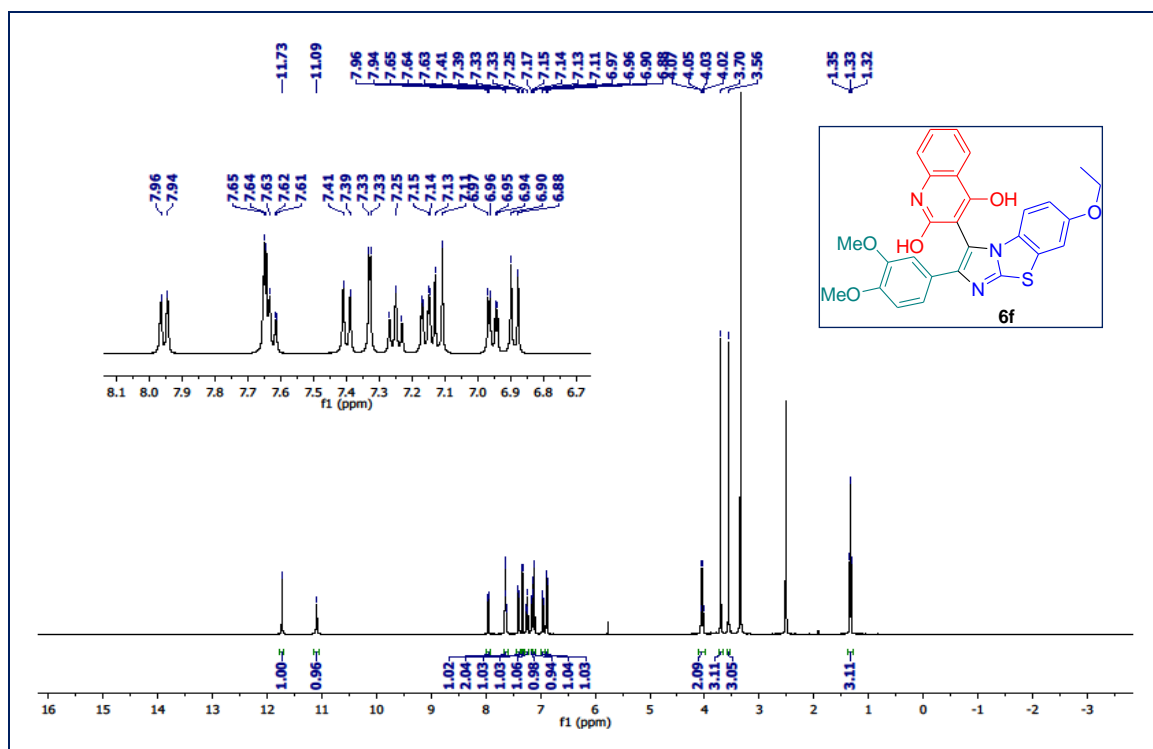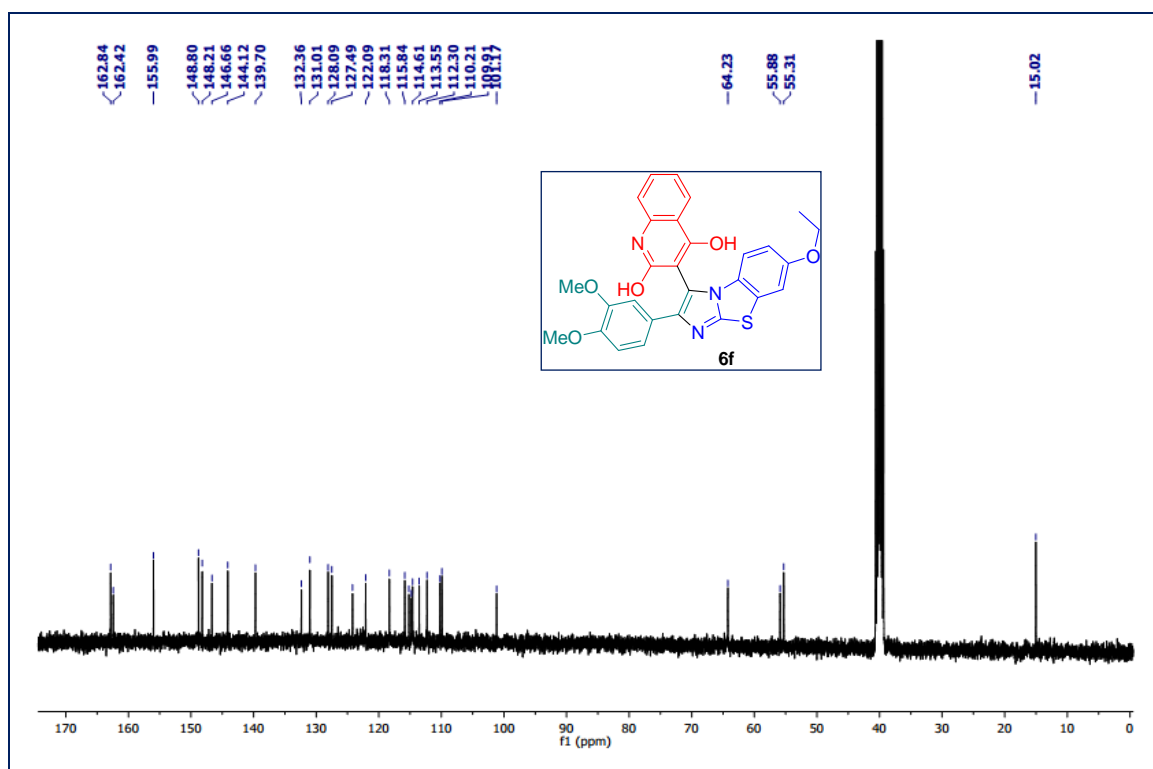

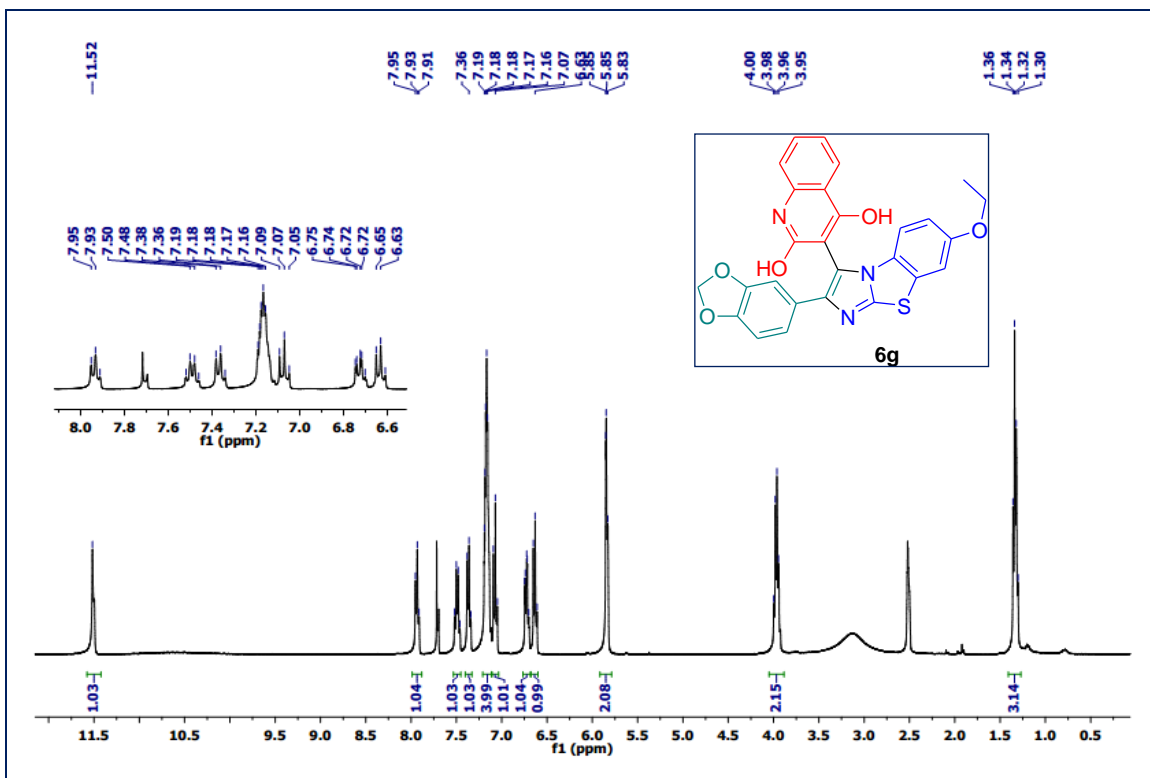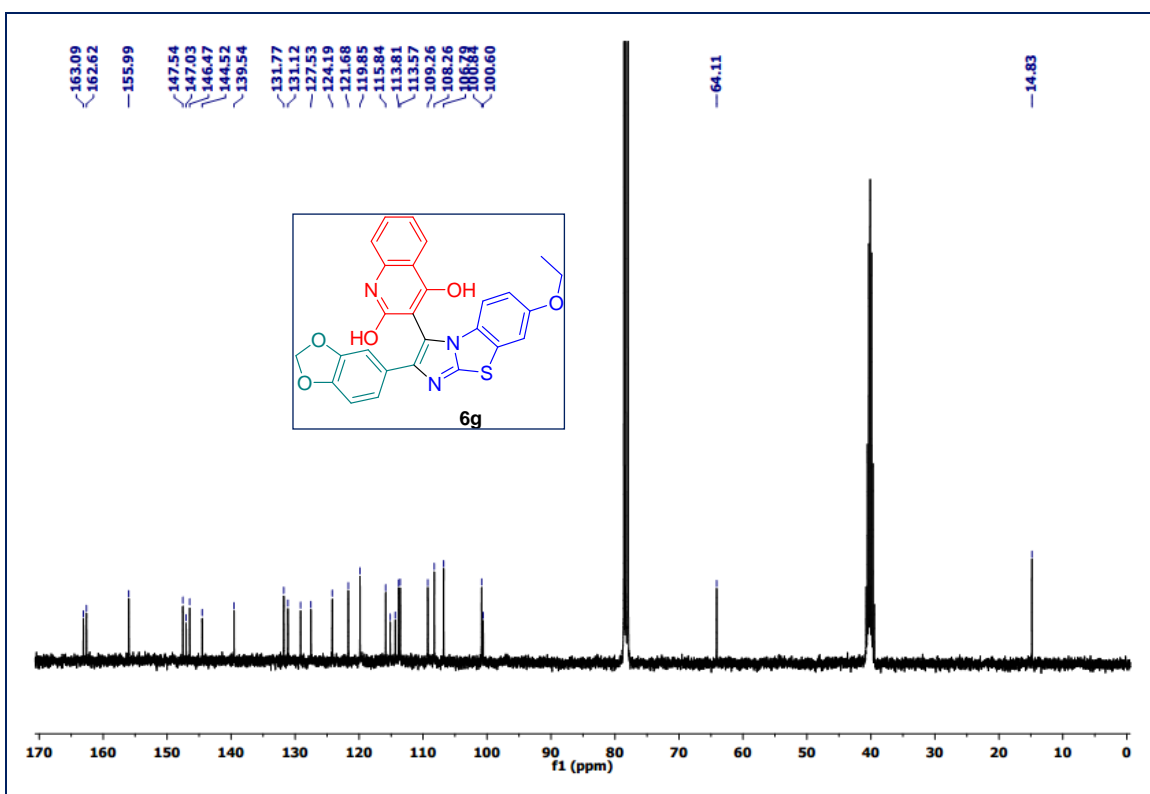

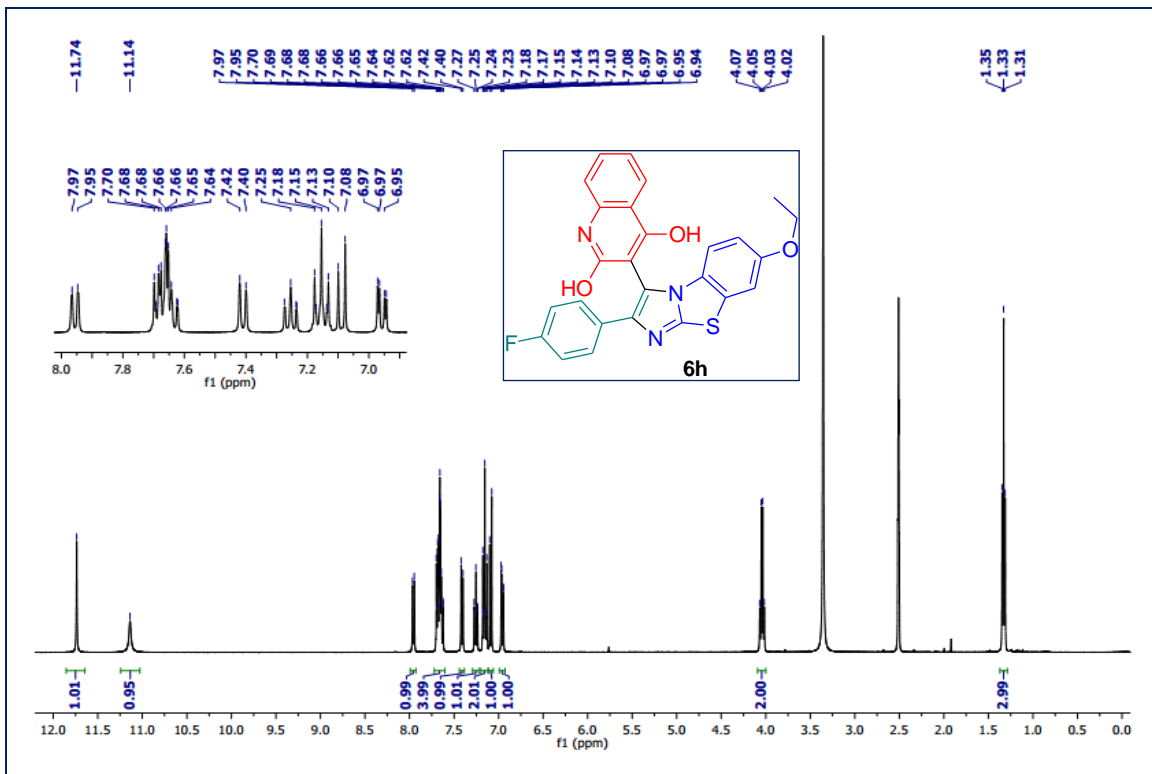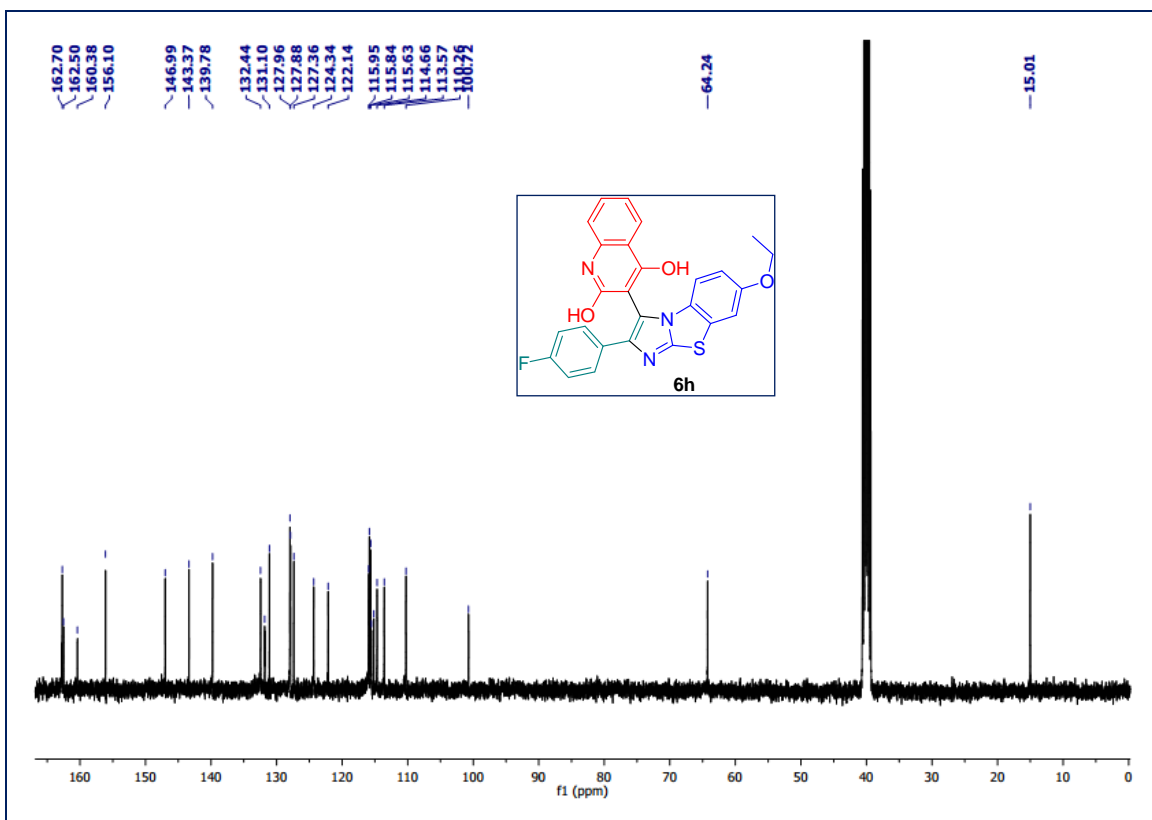

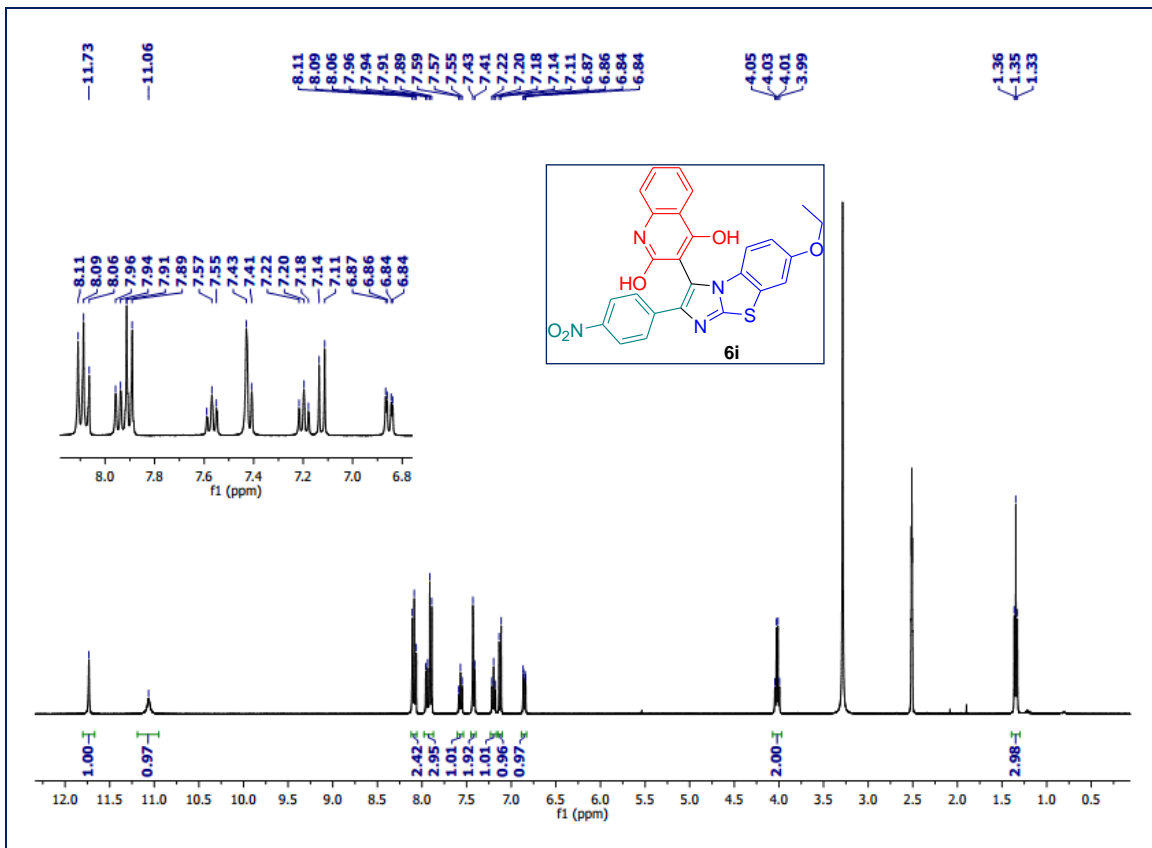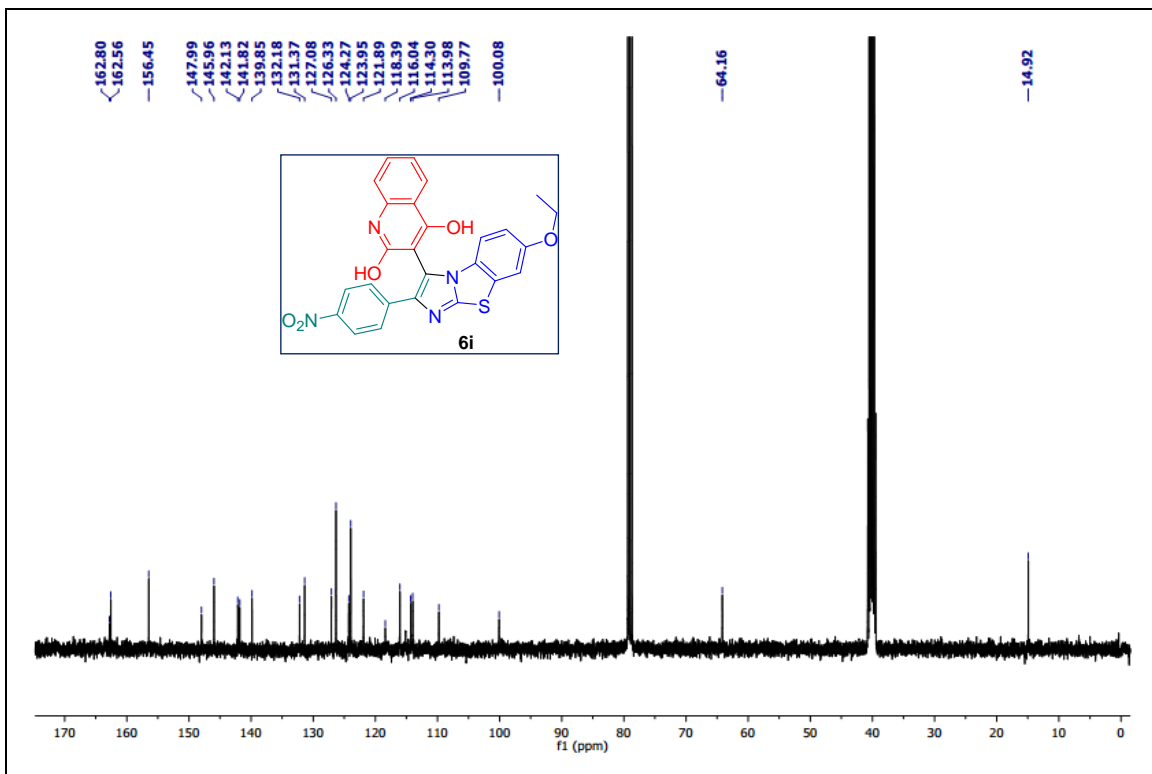

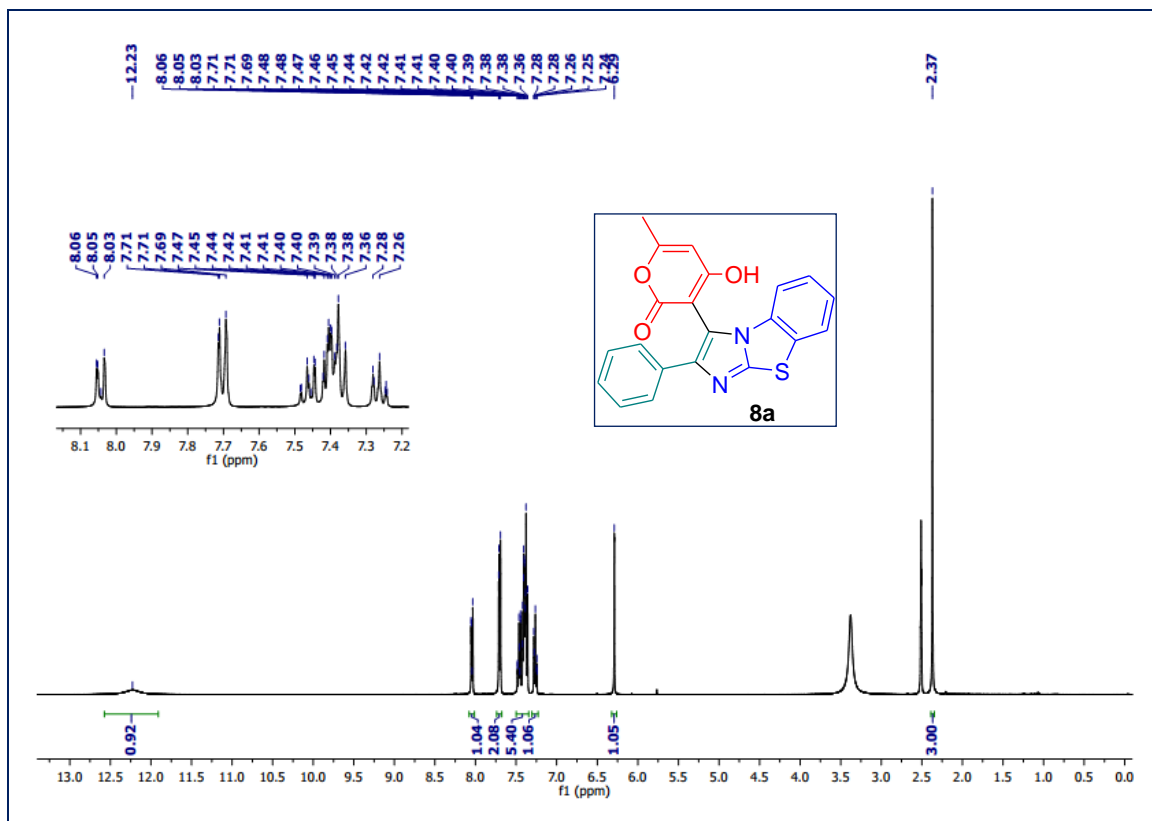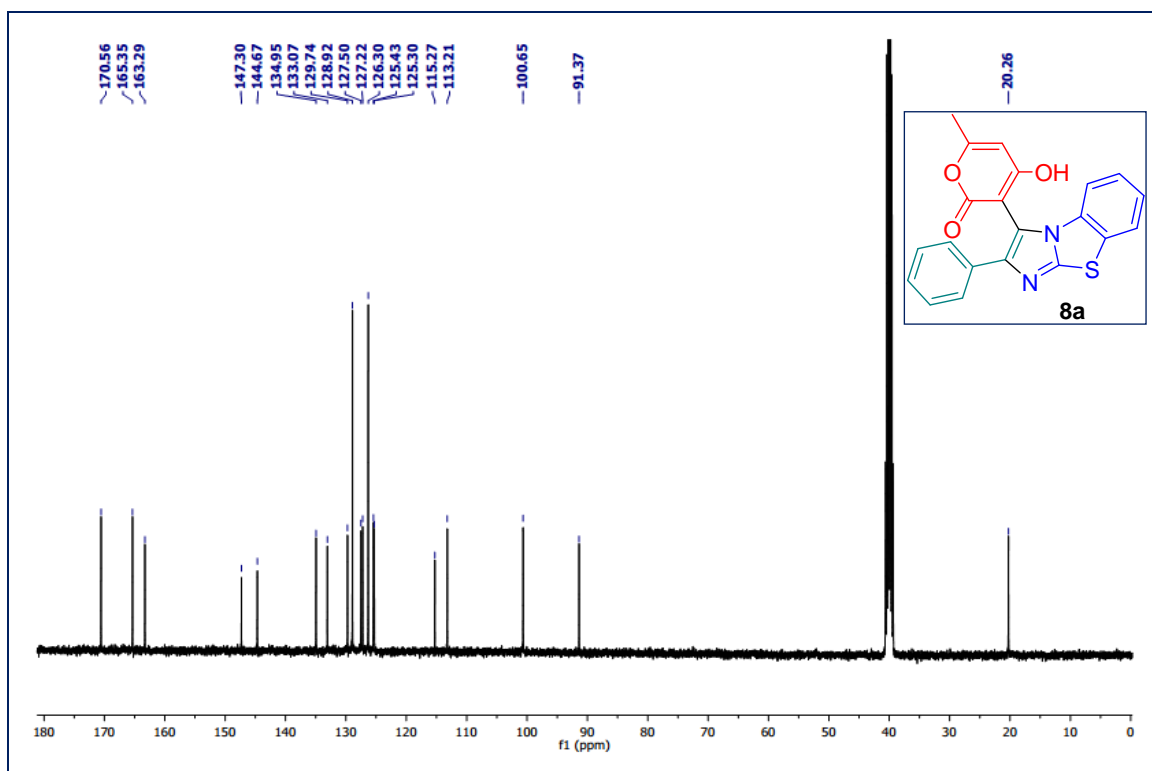

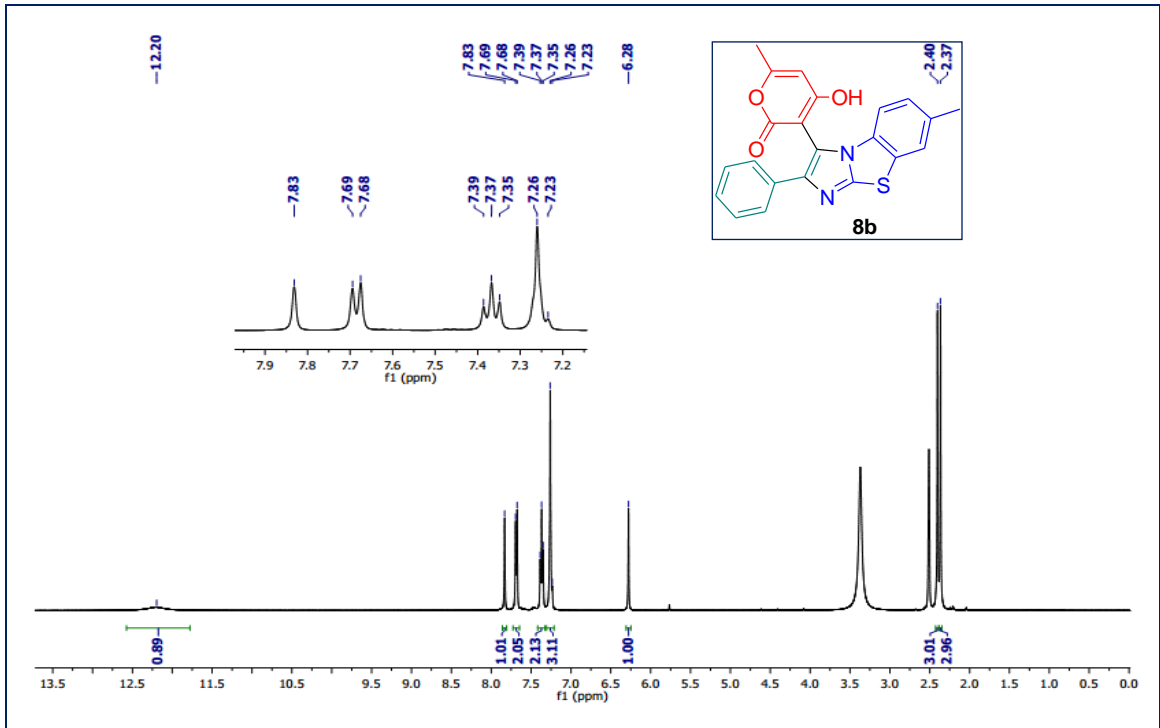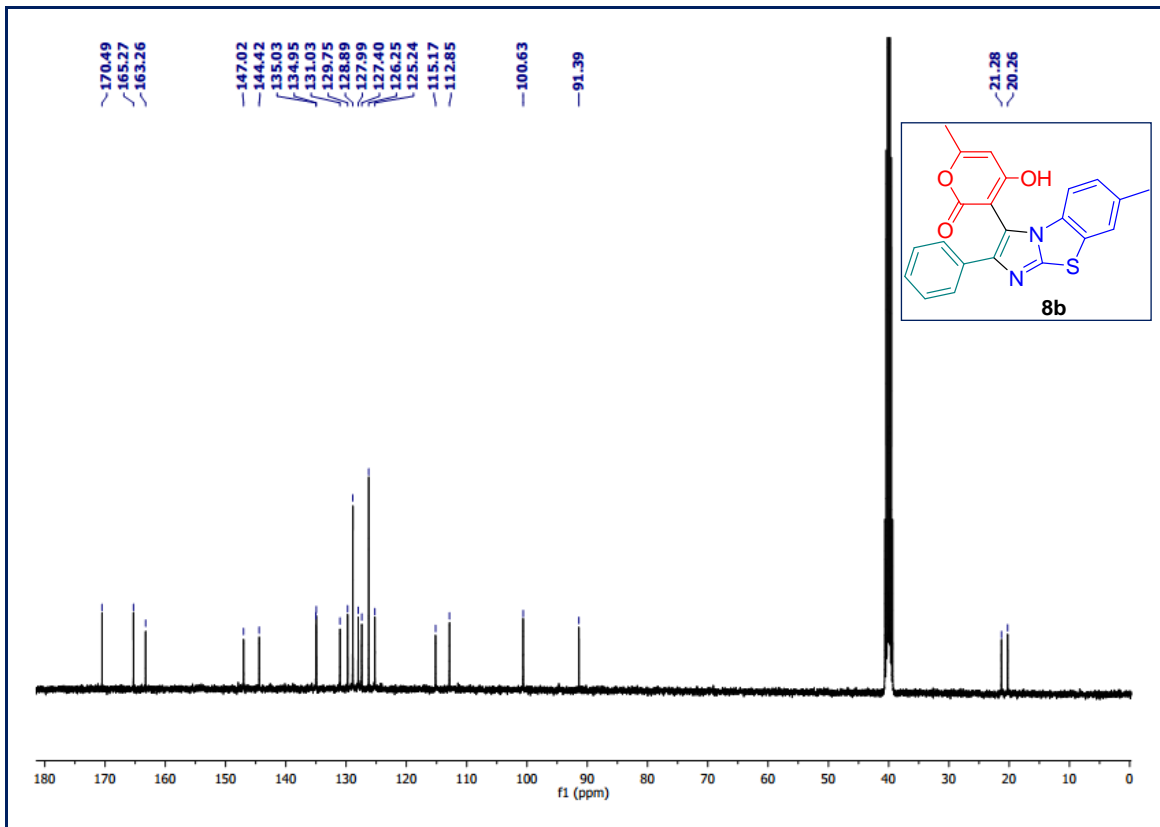

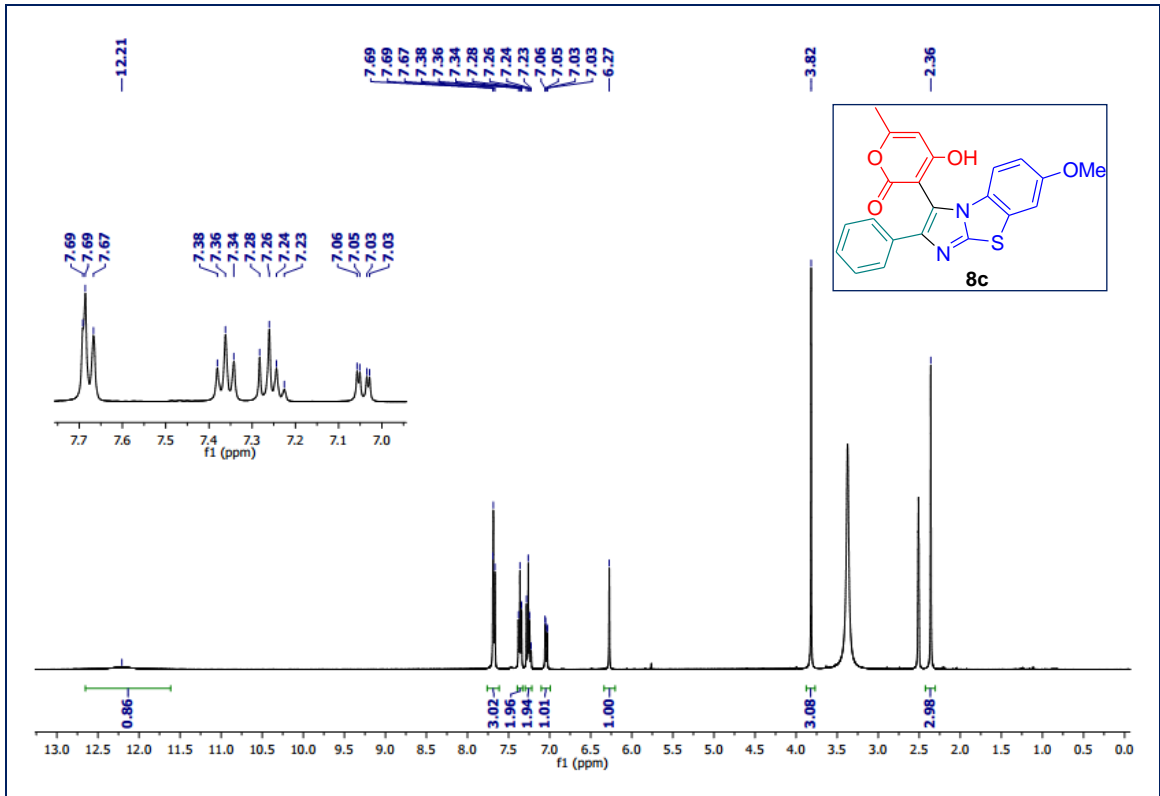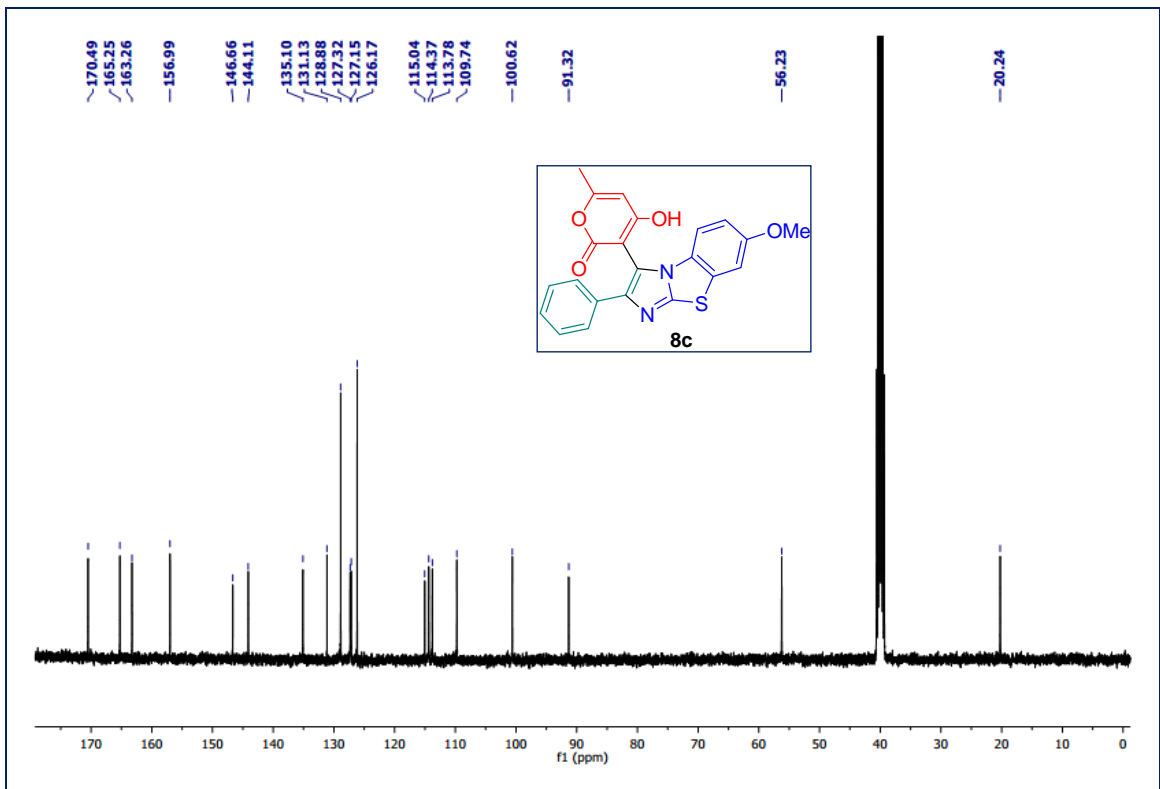

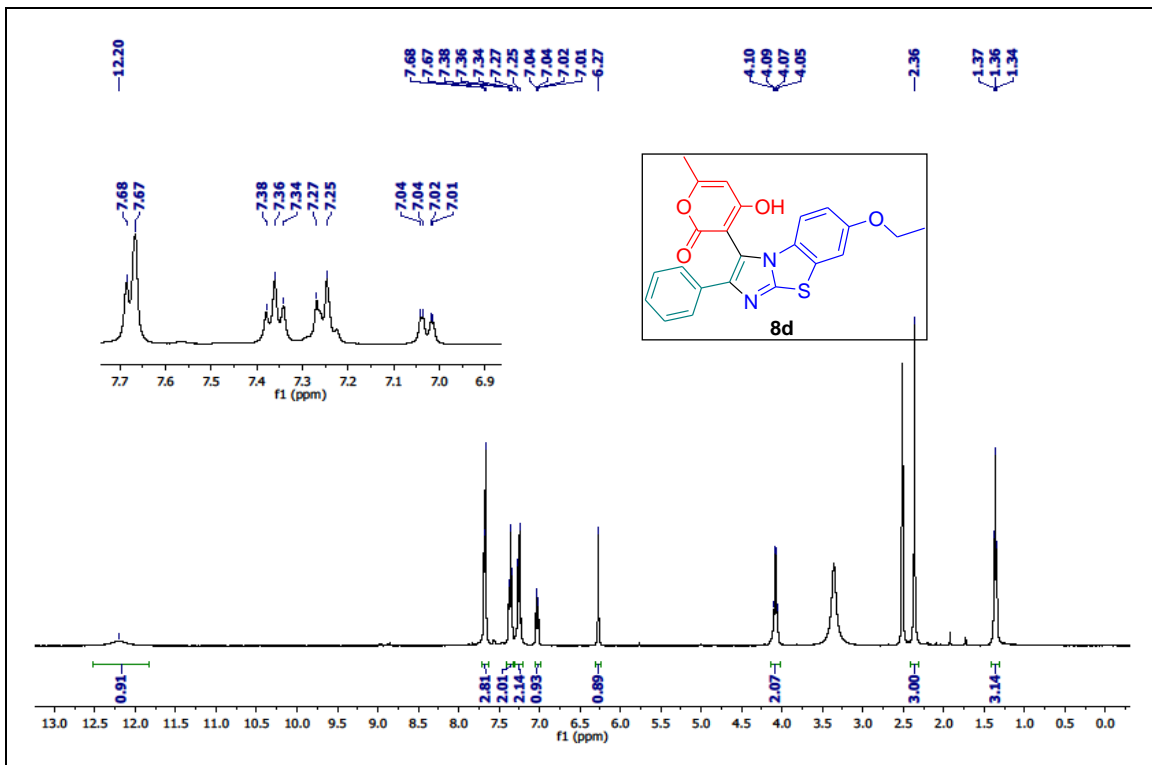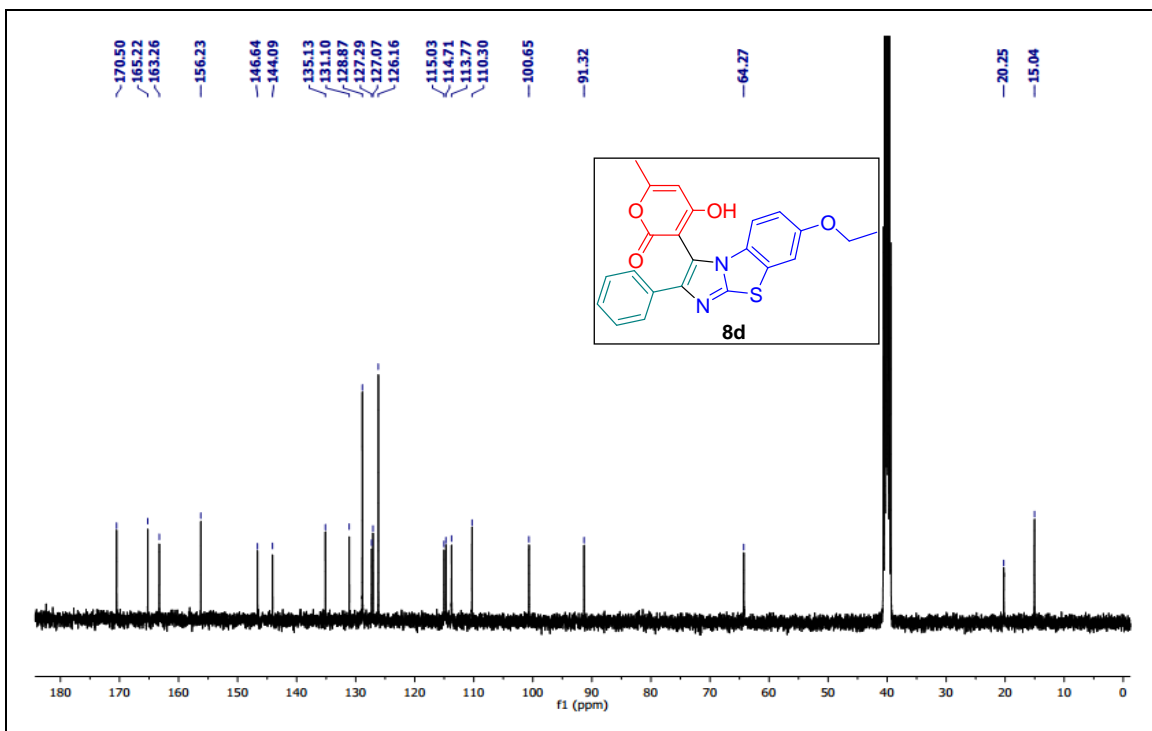



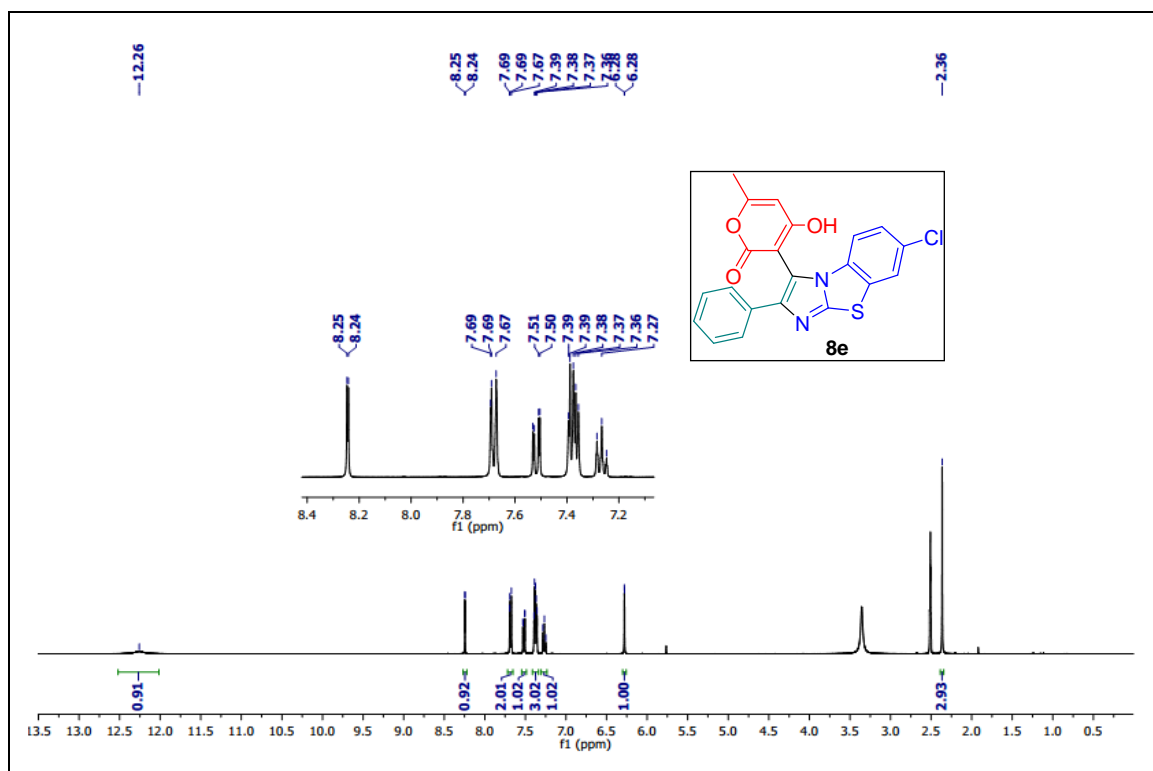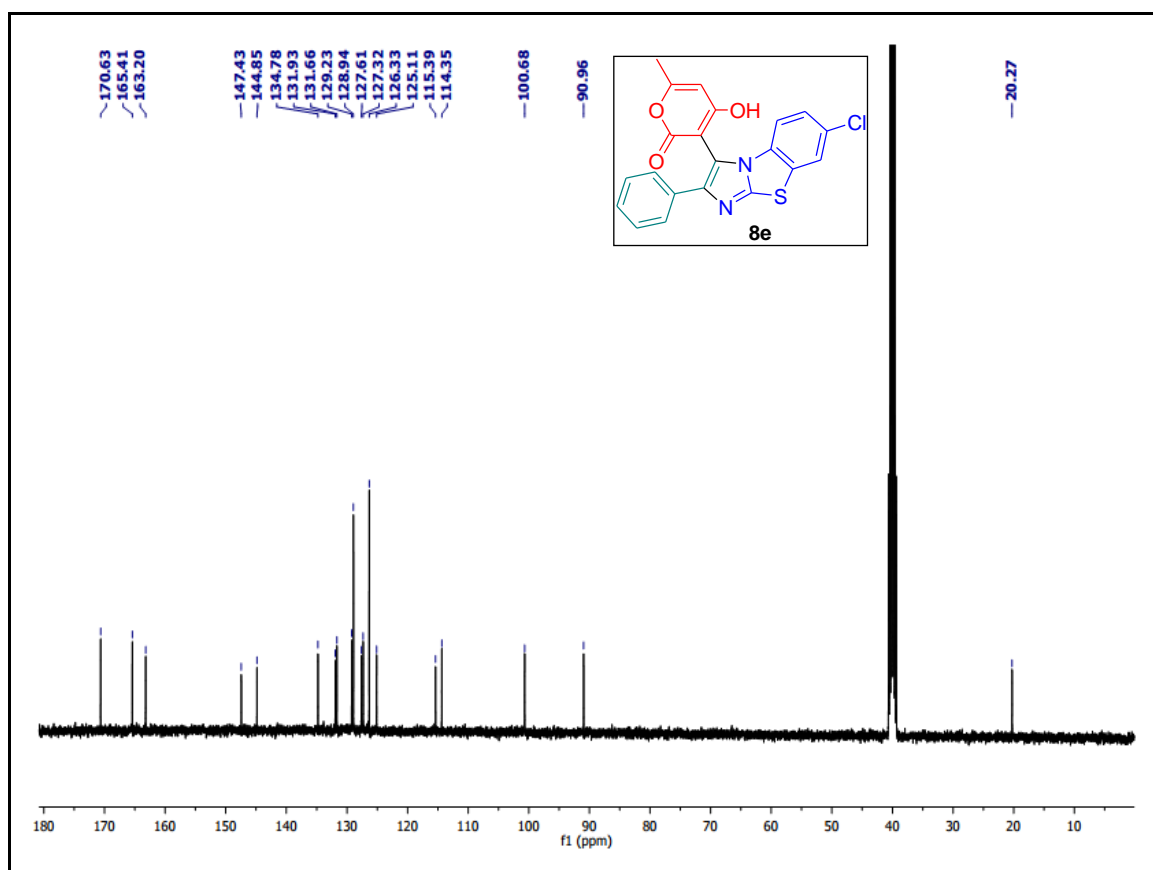

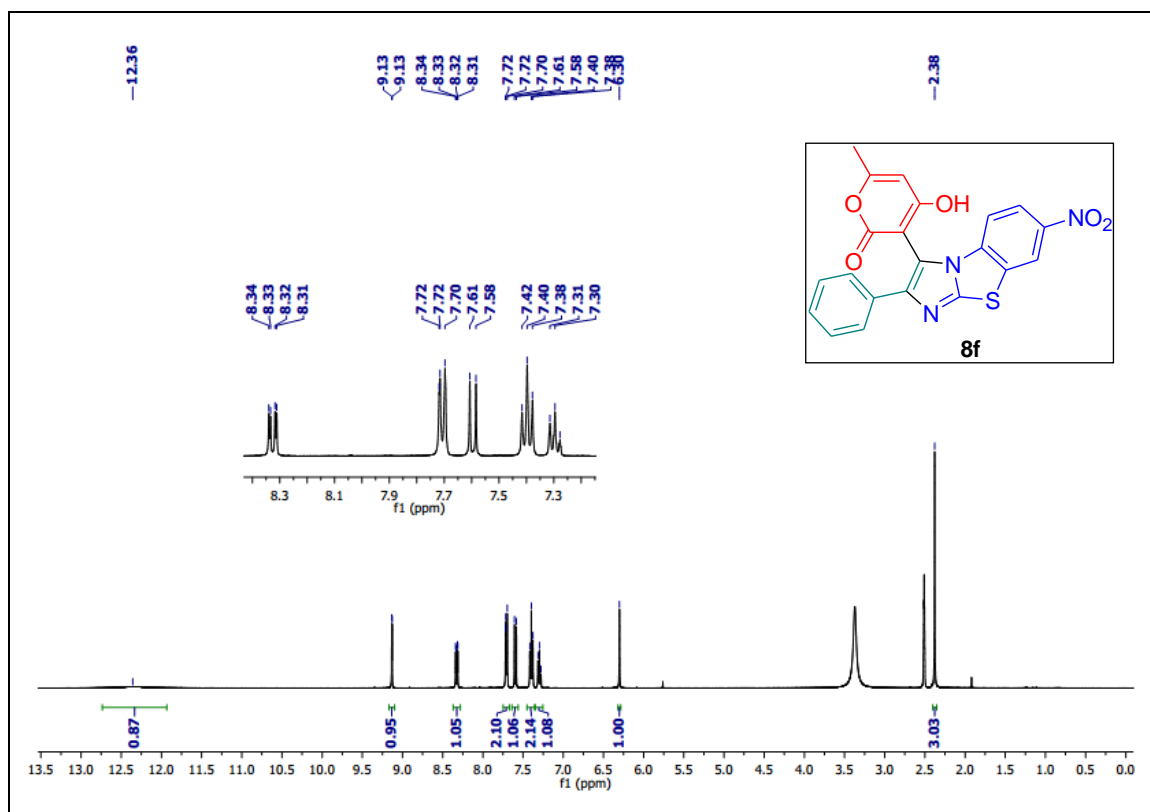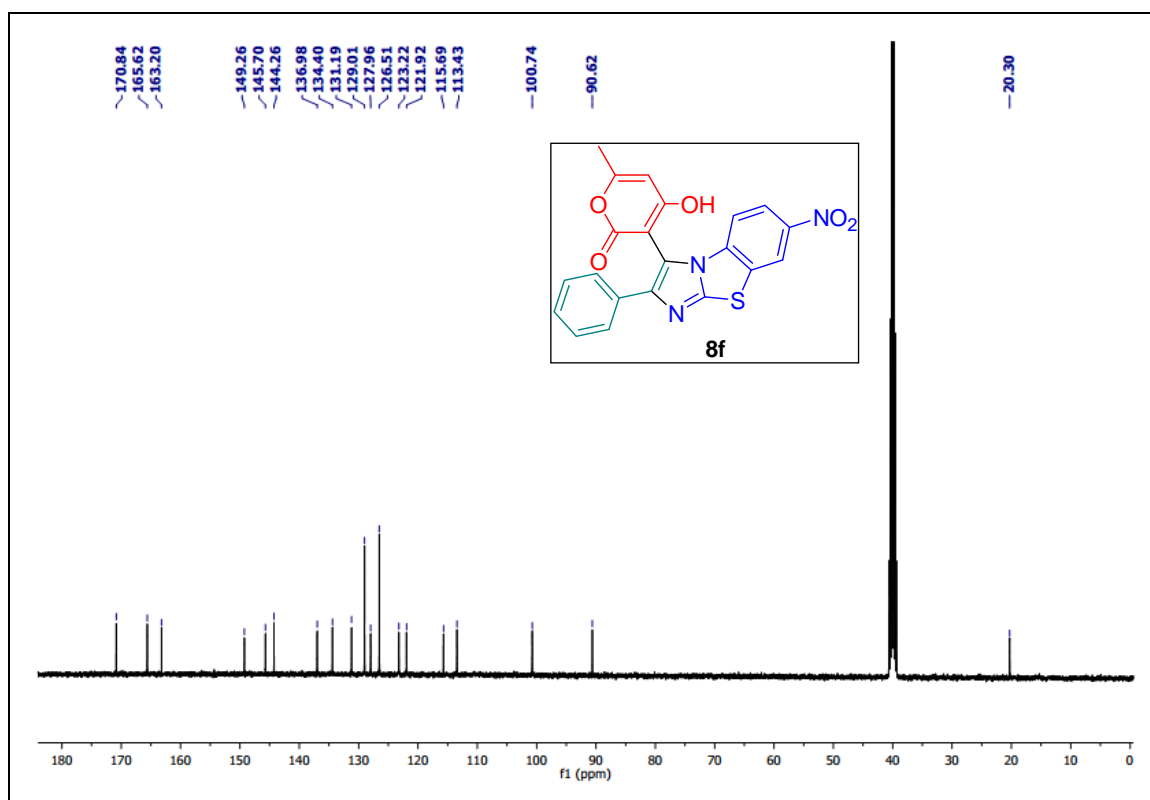

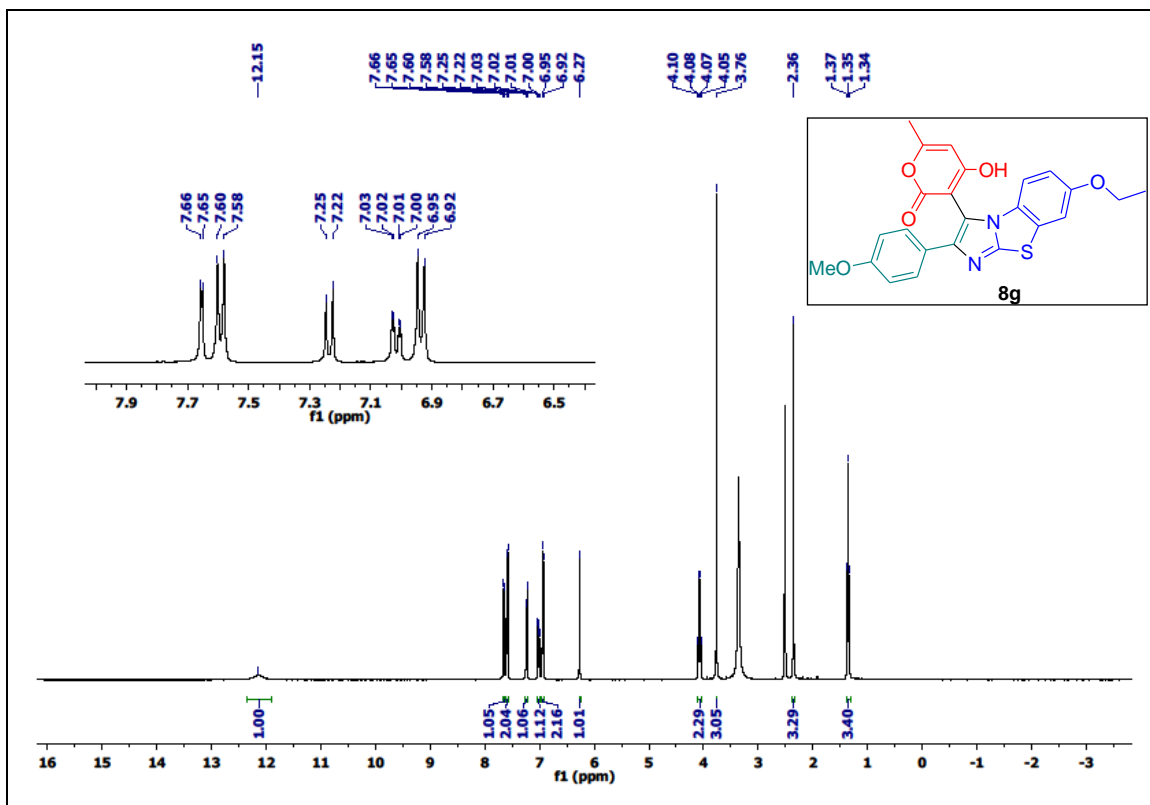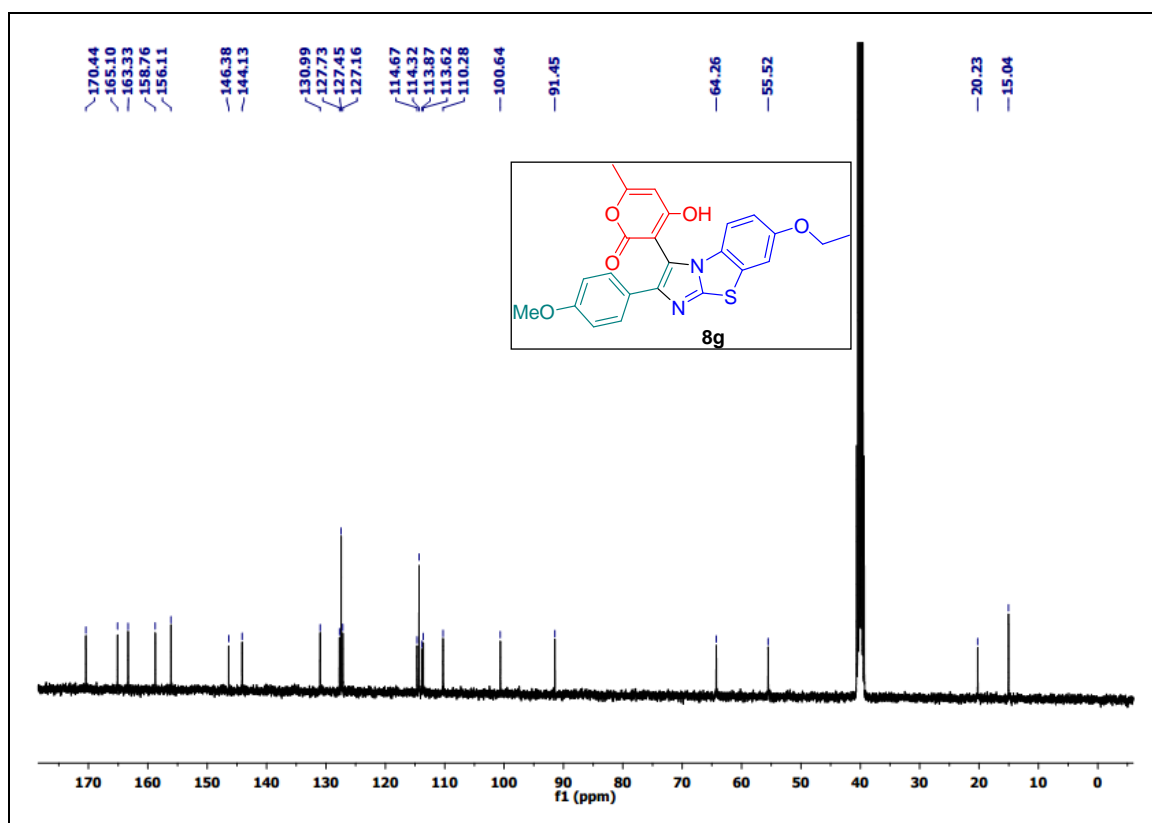

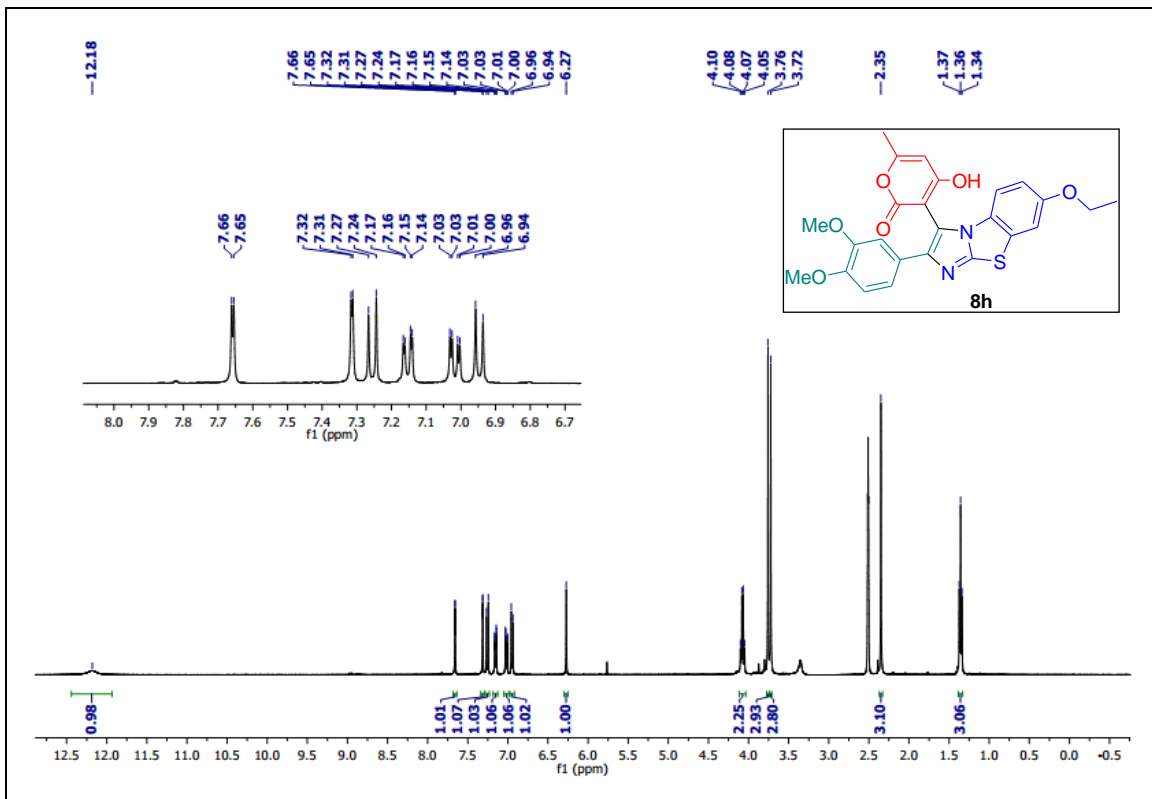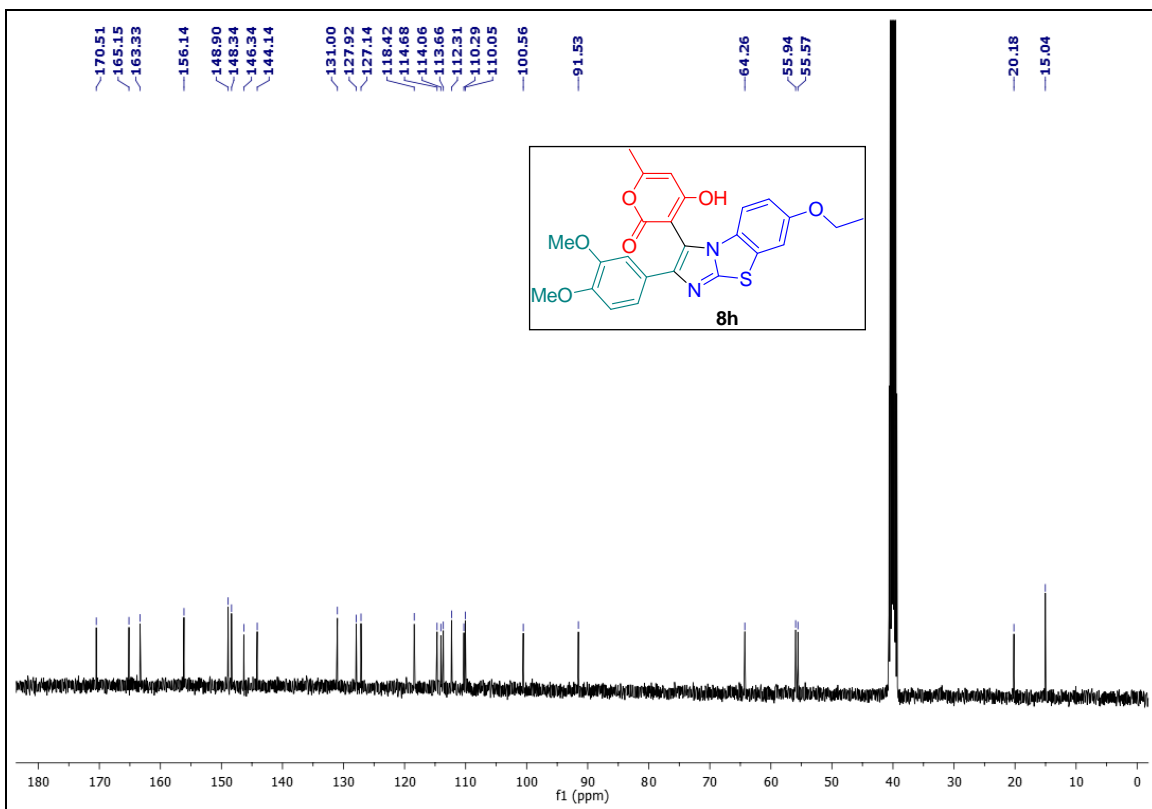

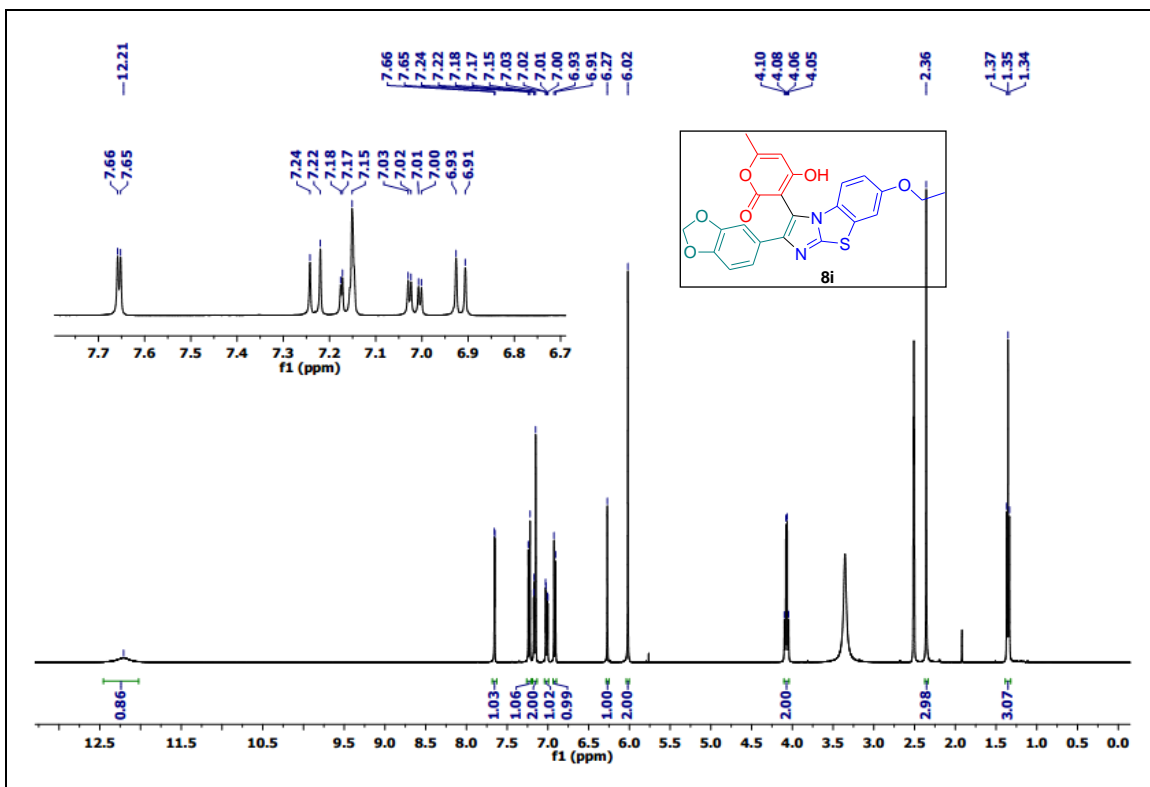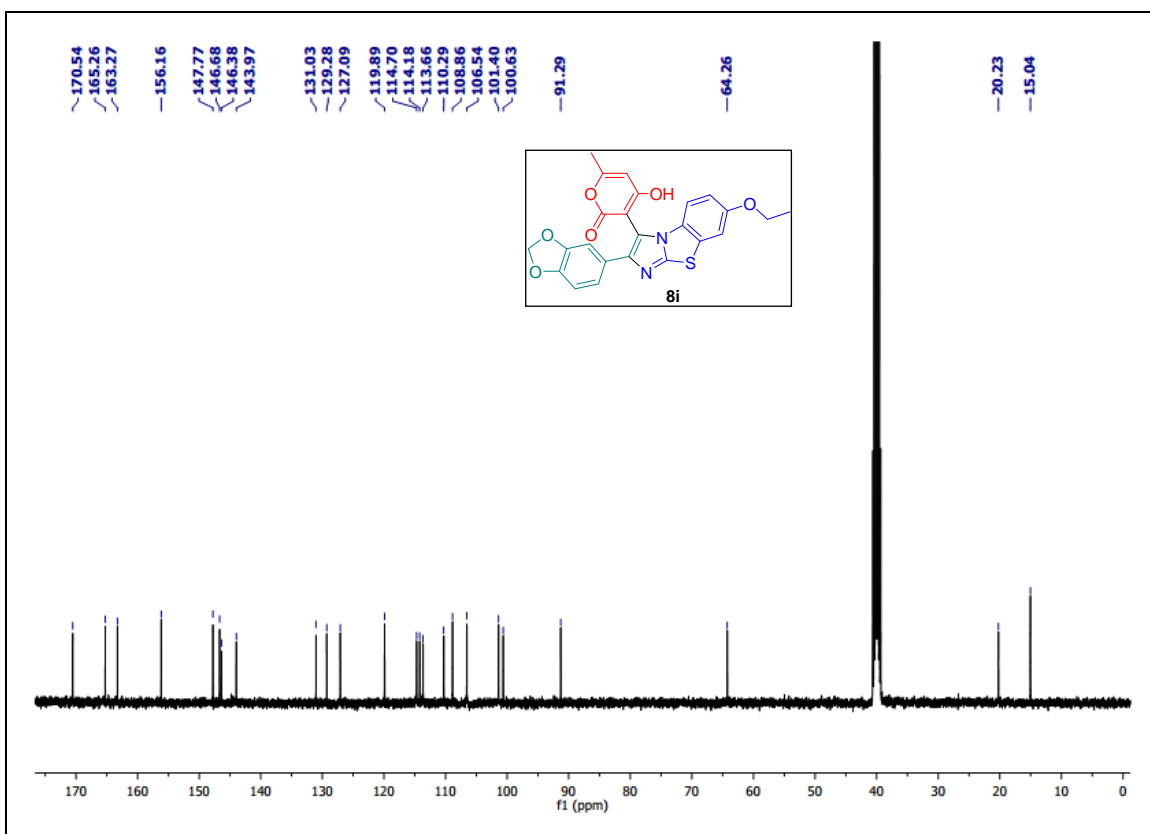

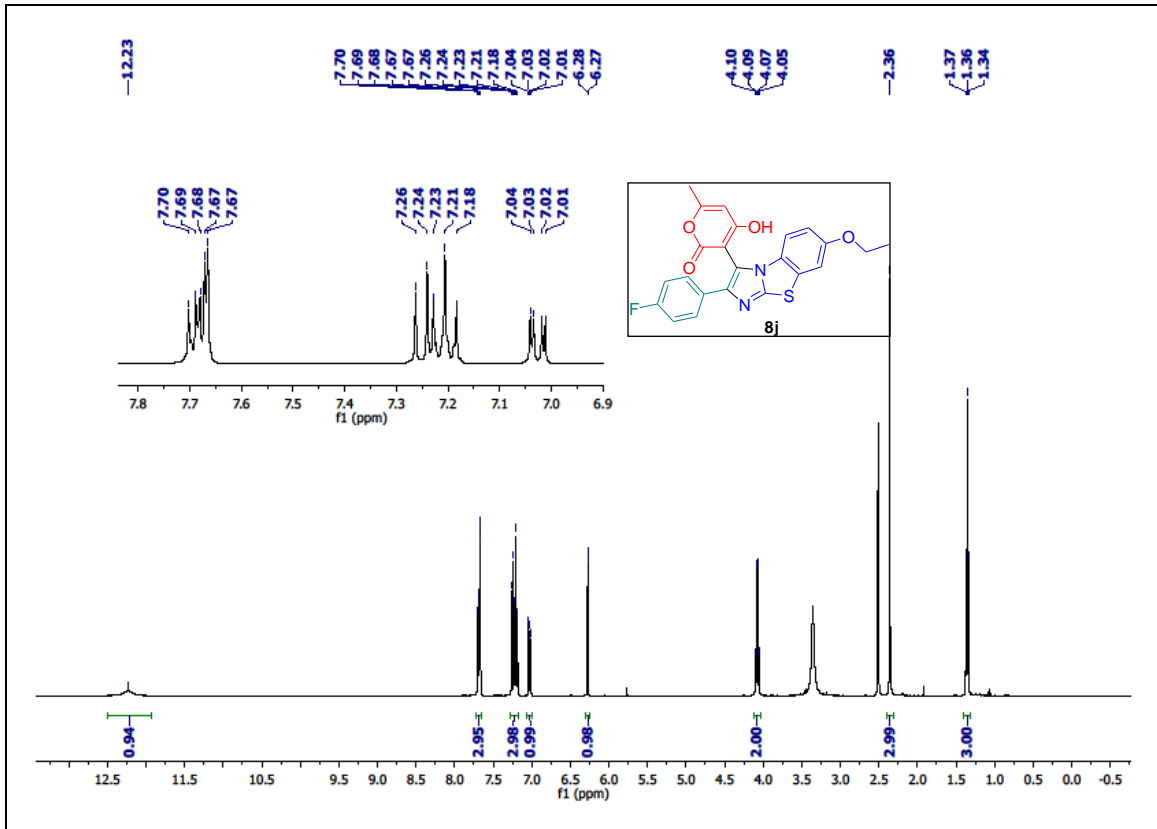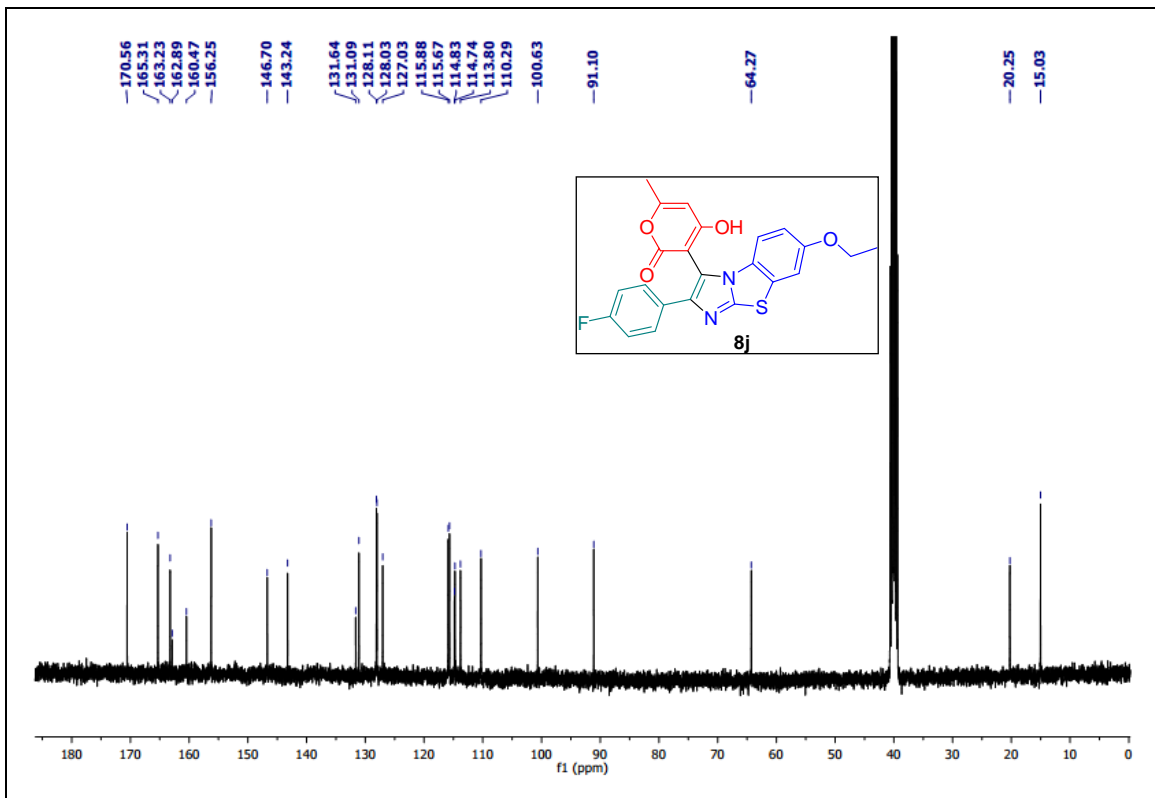

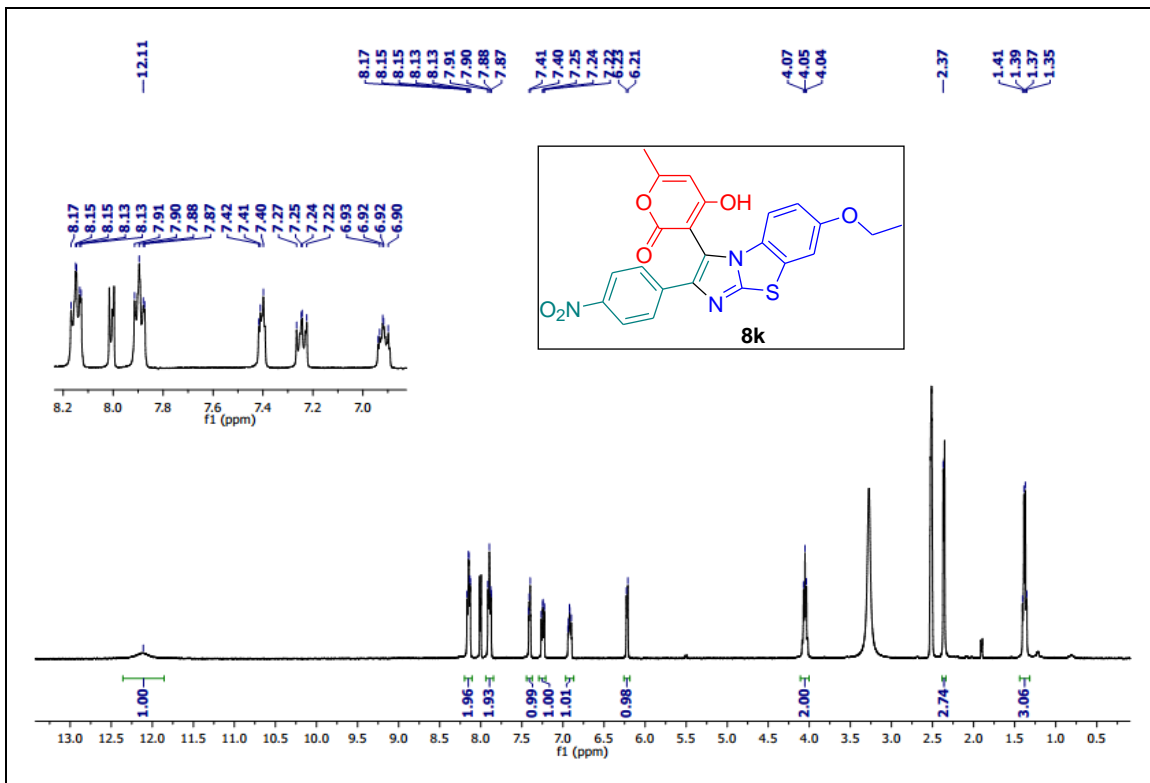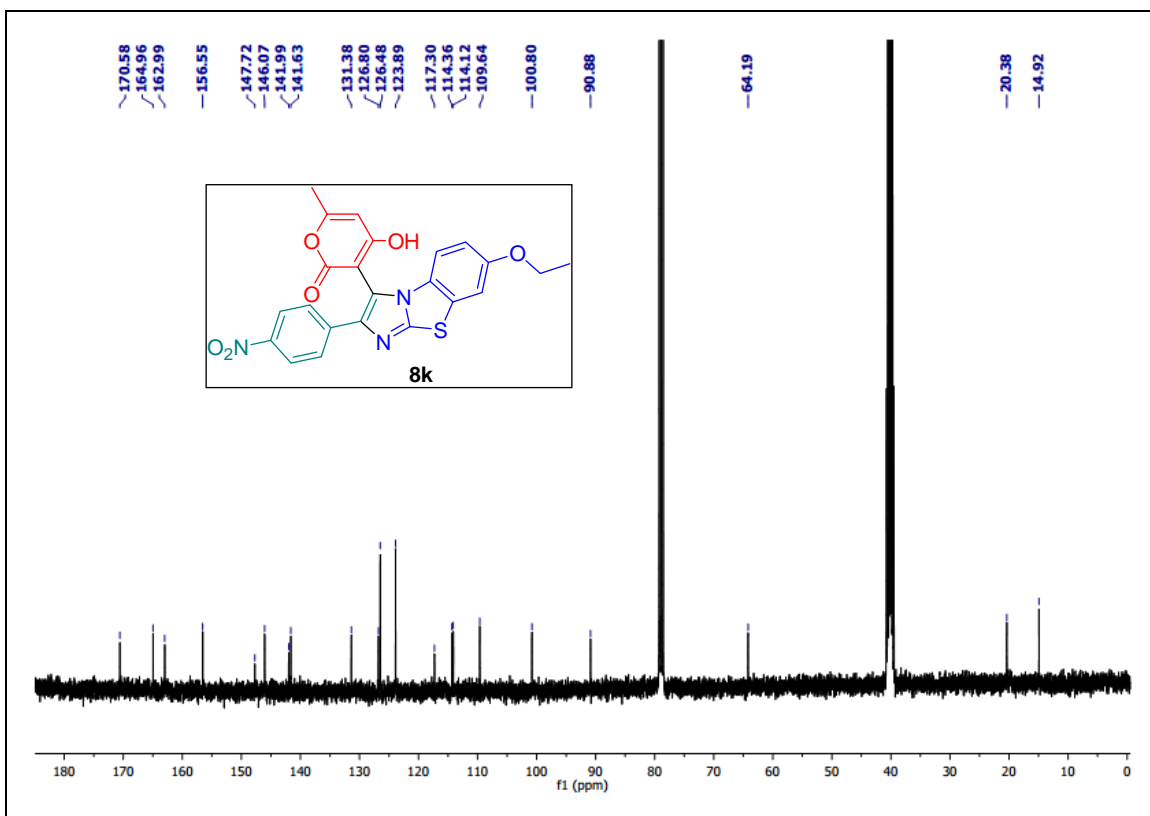

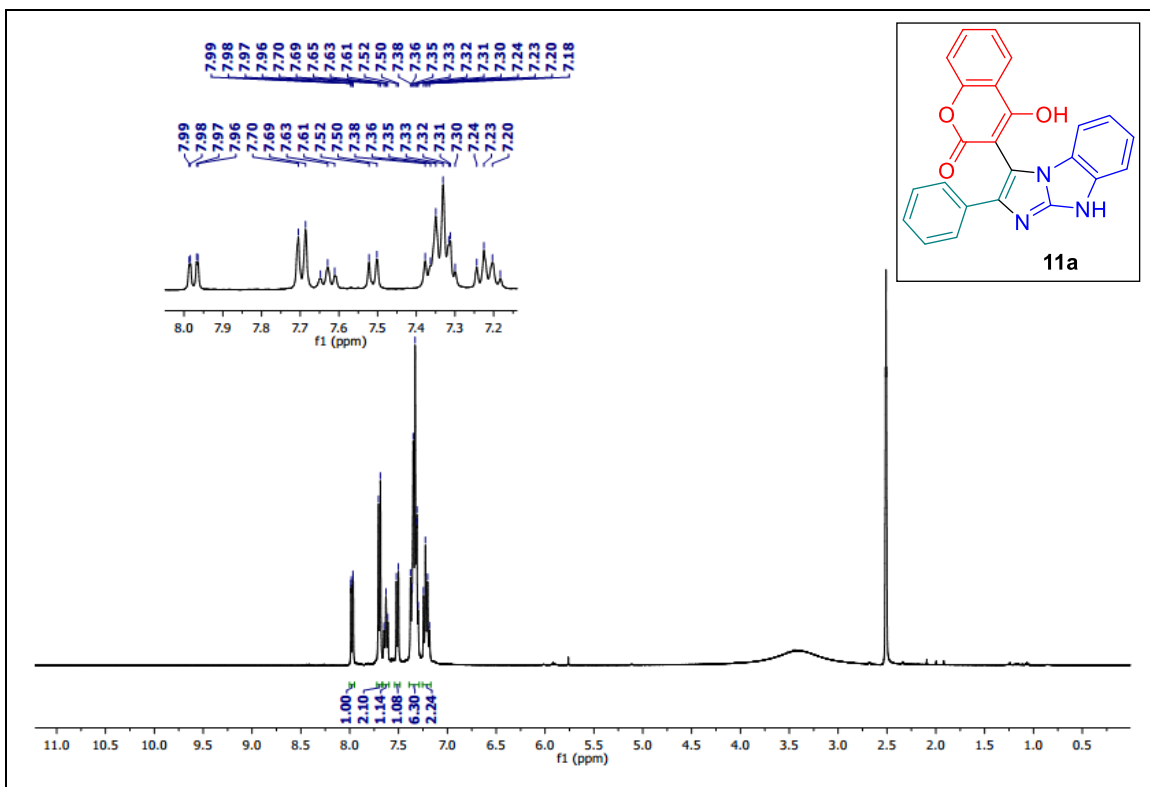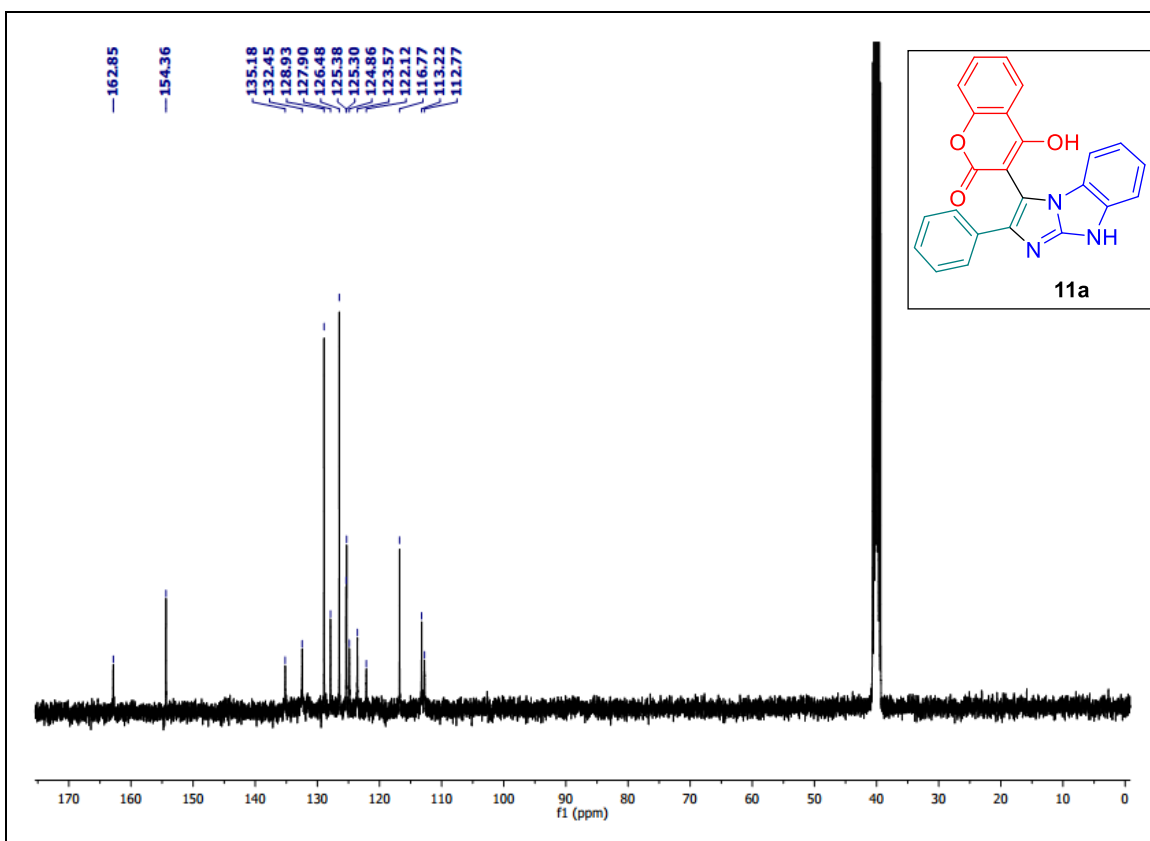



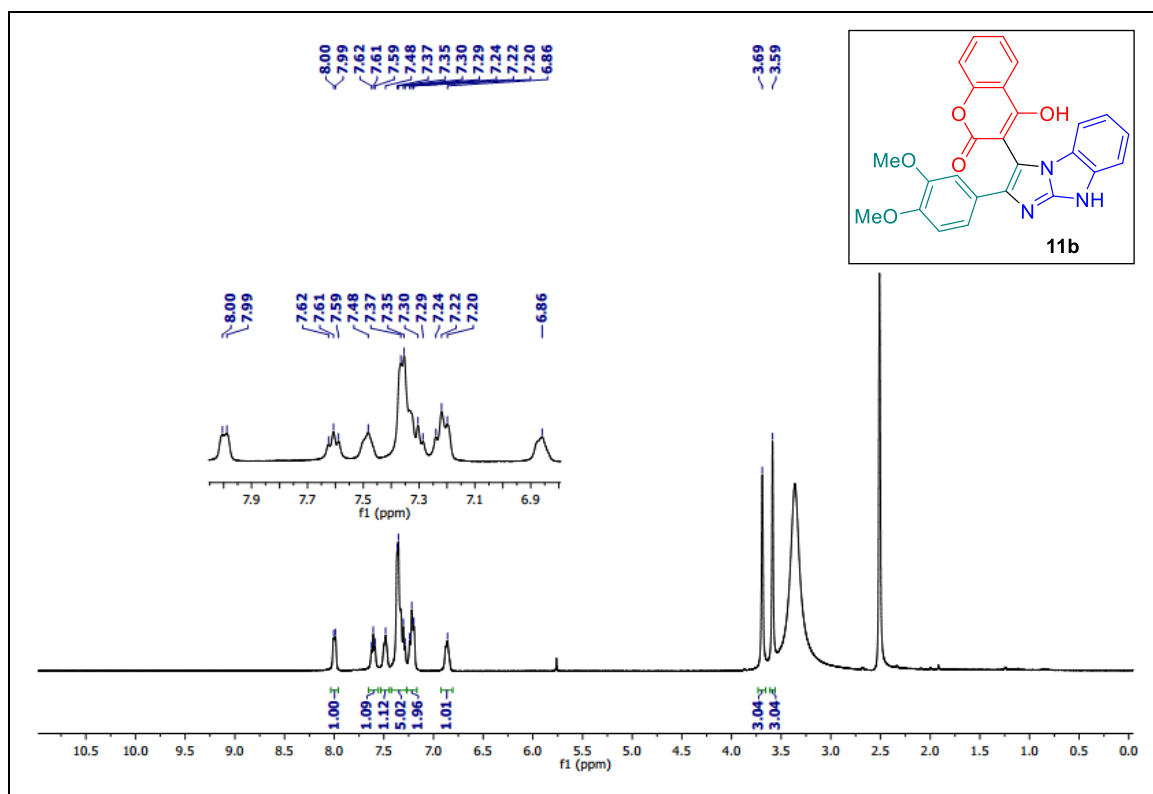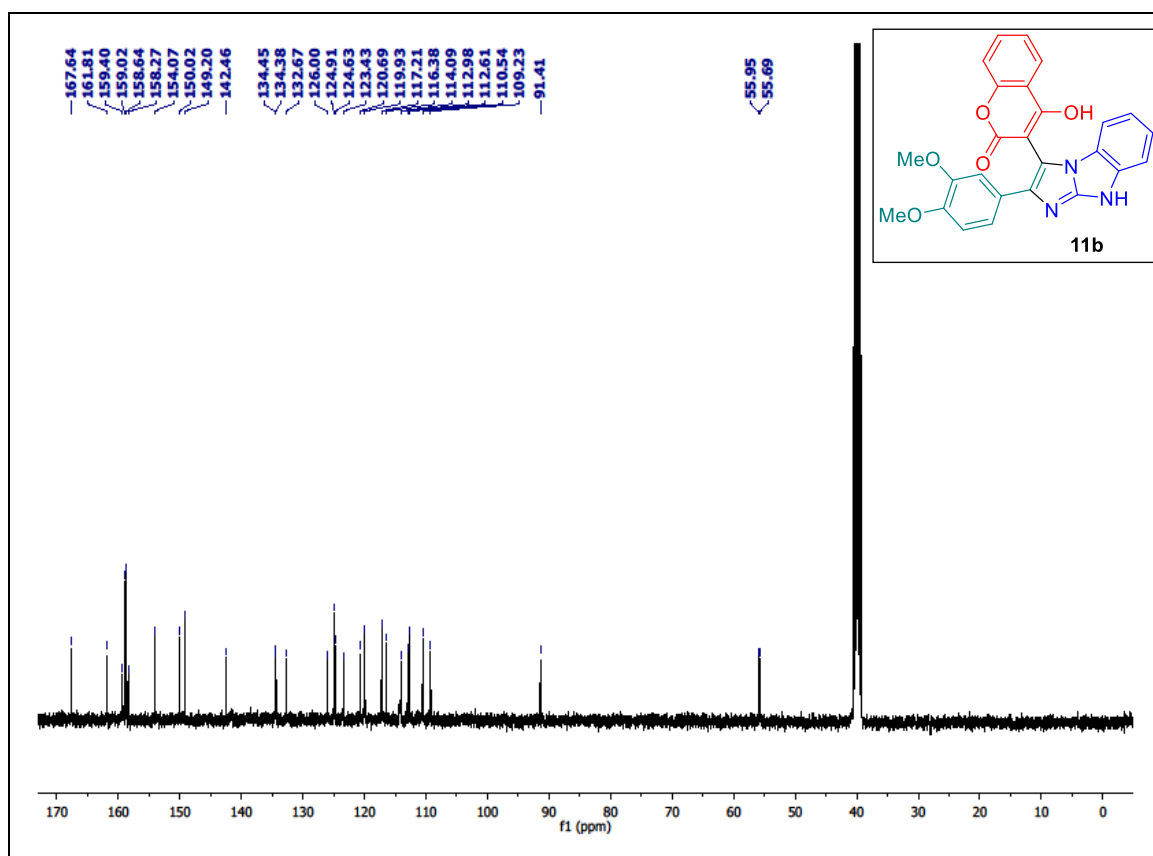

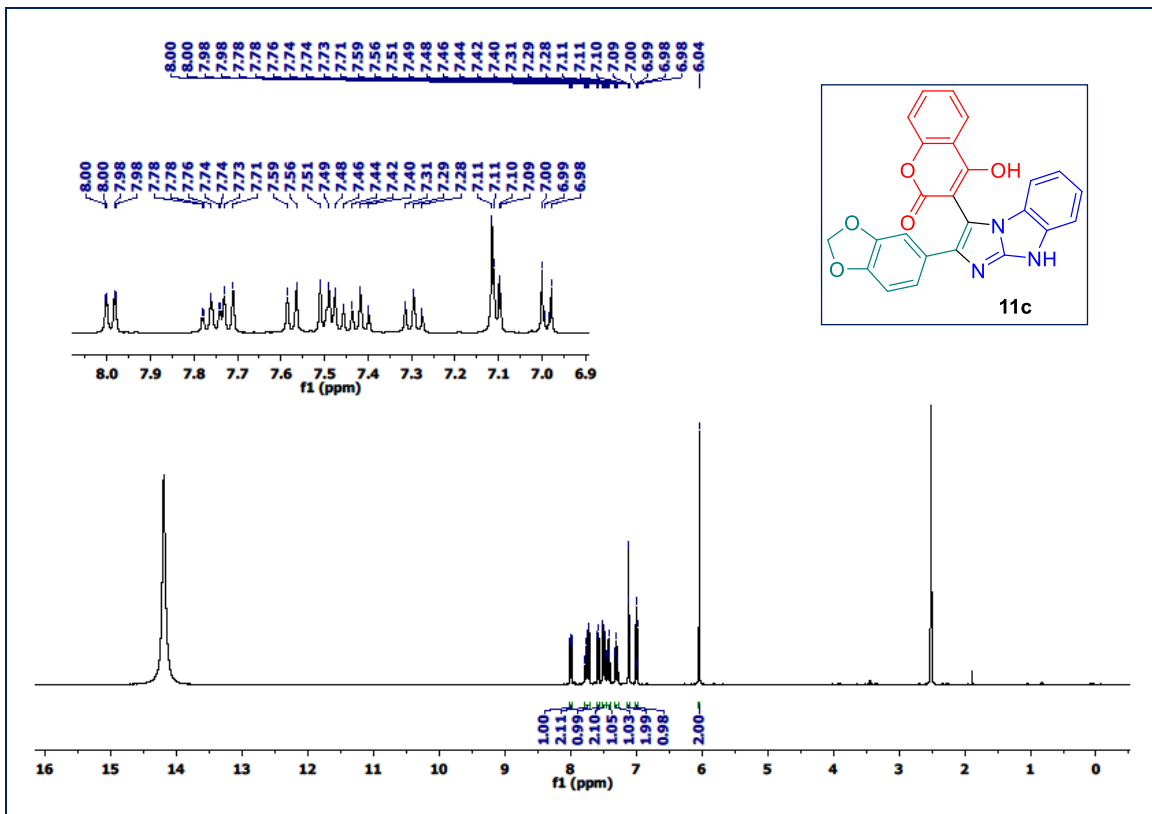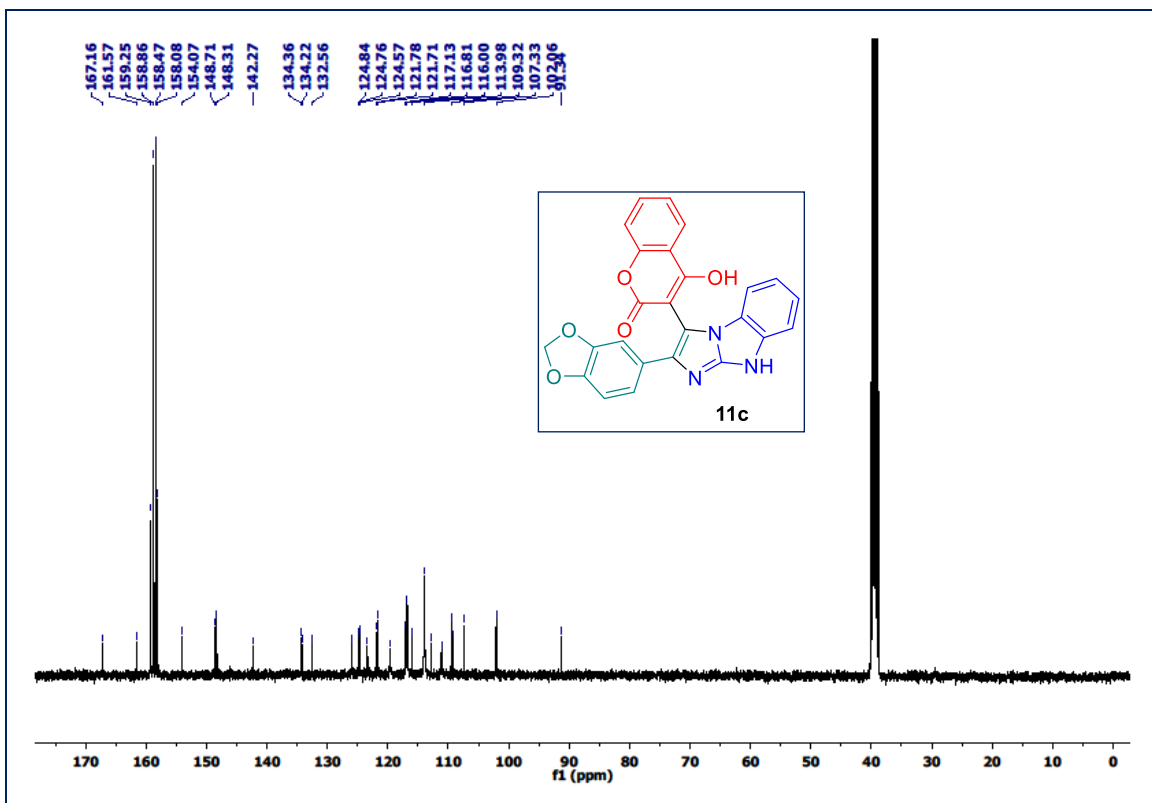



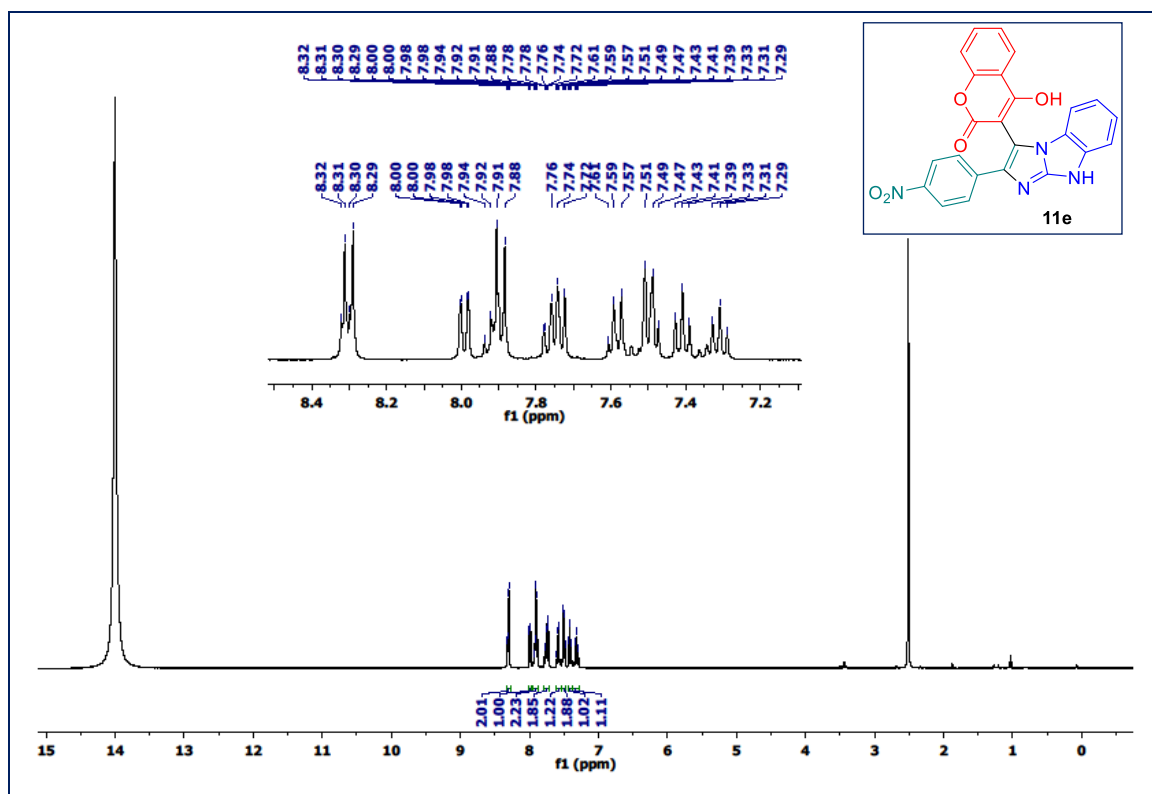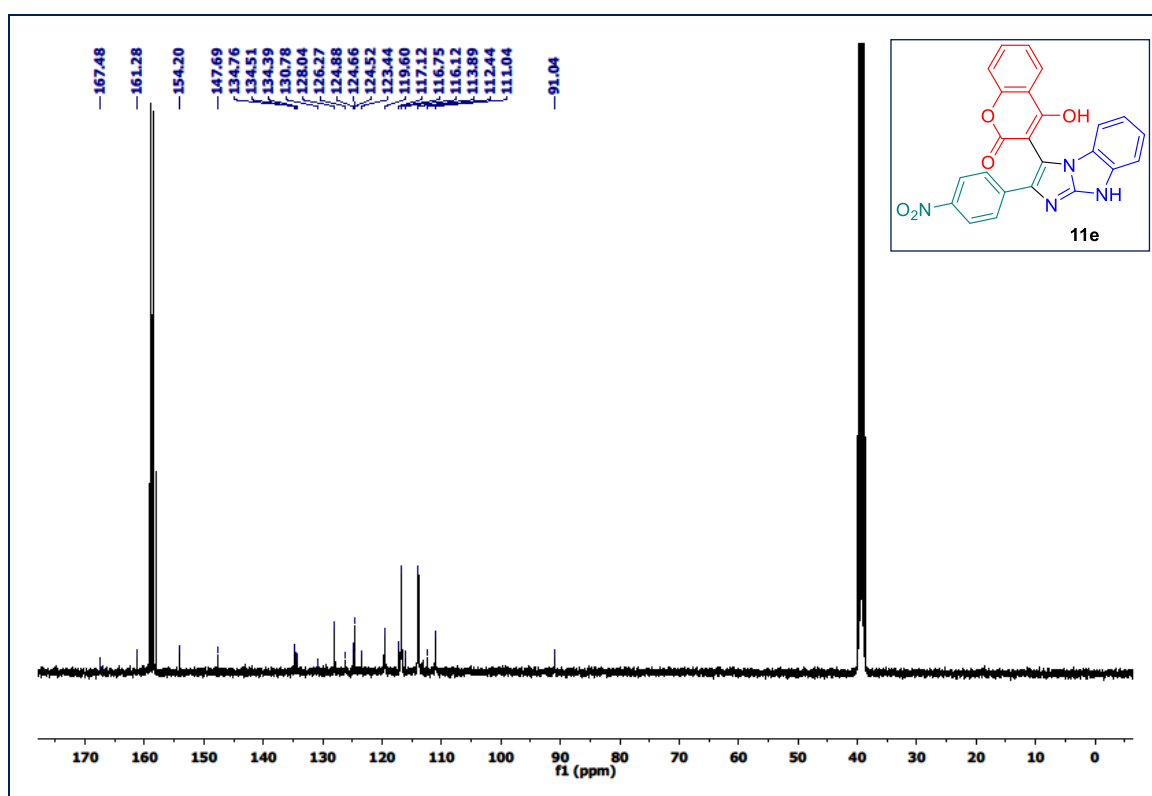

Crystal structure description of **4b**.

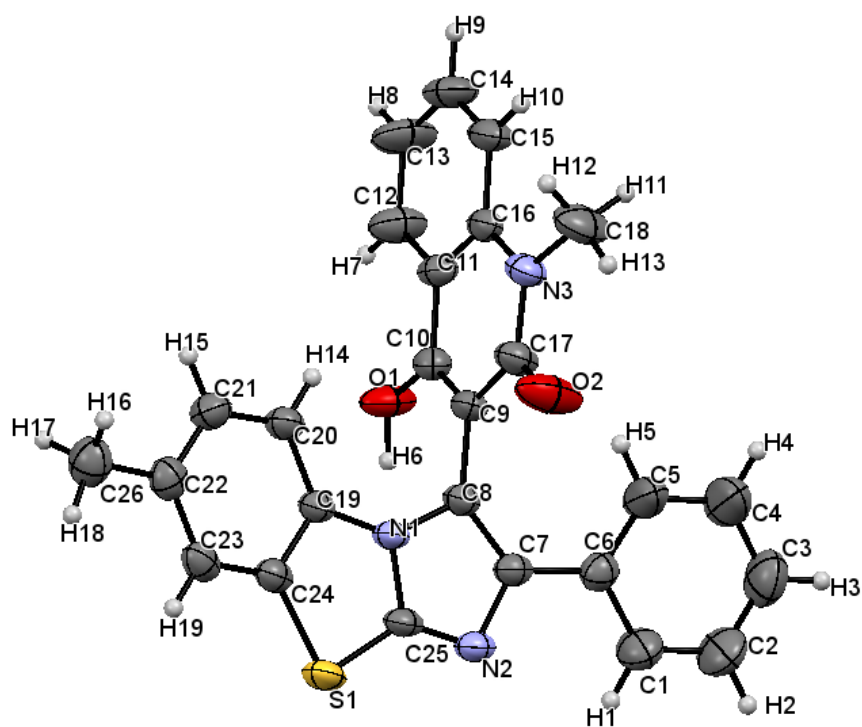

Figure S1. ORTEP view of **4b** with 50% ellipsoidal probability.

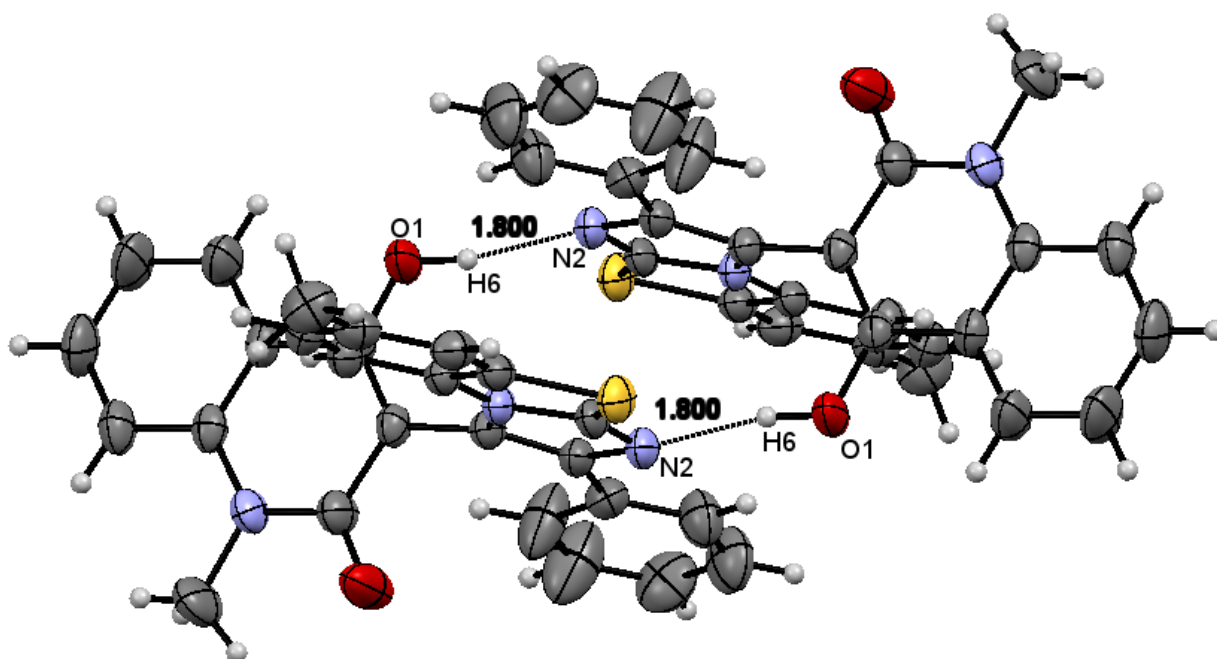

Figure S2. ORTEP view of **4b** with intermolecular hydrogen bonding

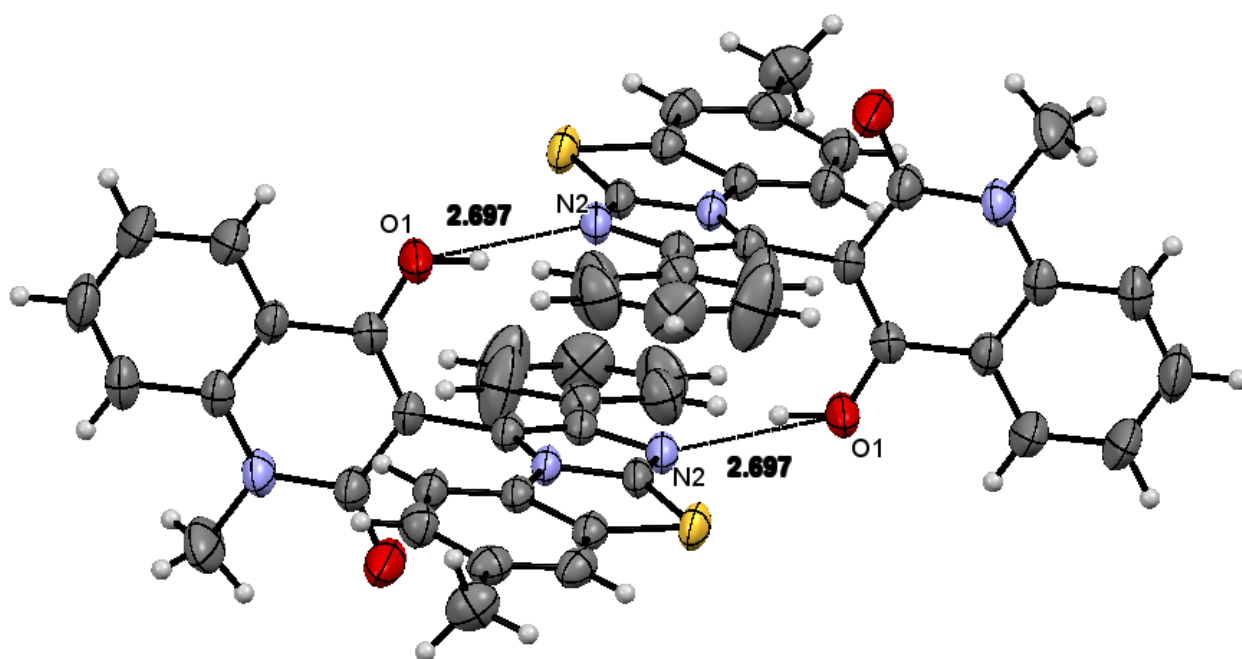

Figure S3. ORTEP view of **4b** with the distance between O...N (Donor-Acceptor) is 2.697 Å.

**Table S1. Sample and crystal data for 4b**

|                        |                                                                 |                 |
|------------------------|-----------------------------------------------------------------|-----------------|
| Chemical formula       | C <sub>26</sub> H <sub>19</sub> N <sub>3</sub> O <sub>2</sub> S |                 |
| Formula weight         | 437.50 g/mol                                                    |                 |
| Temperature            | 298(2) K                                                        |                 |
| Wavelength             | 0.71073 Å                                                       |                 |
| Crystal system         | triclinic                                                       |                 |
| Space group            | P-1                                                             |                 |
| Unit cell dimensions   | a = 9.4053(8) Å                                                 | α = 104.180(2)° |
|                        | b = 10.2781(9) Å                                                | β = 101.225(2)° |
|                        | c = 11.6661(10) Å                                               | γ = 93.954(2)°  |
| Volume                 | 1064.37(16) Å <sup>3</sup>                                      |                 |
| Z                      | 2                                                               |                 |
| Density (calculated)   | 1.365 g/cm <sup>3</sup>                                         |                 |
| Absorption coefficient | 0.182 mm <sup>-1</sup>                                          |                 |
| F(000)                 | 456                                                             |                 |

**Table S2. Data collection and structure refinement for 4b**

|                                                                        |                                                                                     |                           |  |
|------------------------------------------------------------------------|-------------------------------------------------------------------------------------|---------------------------|--|
| Theta range for data collection                                        | 2.56 to 26.08°                                                                      |                           |  |
| Index ranges                                                           | -11 ≤ h ≤ 11, -1 ≤ k ≤ 12, -14 ≤ l ≤ 14                                             |                           |  |
| Reflections collected                                                  | 19518                                                                               |                           |  |
| Independent reflections                                                | 4225 [R(int) = 0.0321]                                                              |                           |  |
| Structure solution technique                                           | direct methods                                                                      |                           |  |
| Structure solution program                                             | XT, VERSION 2014/5                                                                  |                           |  |
| Refinement method                                                      | Full-matrix least-squares on F <sup>2</sup>                                         |                           |  |
| Refinement program                                                     | SHELXL-2014/7 (Sheldrick, 2014)                                                     |                           |  |
| Function minimized                                                     | Σ w(F <sub>o</sub> <sup>2</sup> - F <sub>c</sub> <sup>2</sup> ) <sup>2</sup>        |                           |  |
| Data / restraints / parameters                                         | 4225 / 0 / 296                                                                      |                           |  |
| Goodness-of-fit on F <sup>2</sup>                                      | 1.026                                                                               |                           |  |
| Δ/σ <sub>max</sub>                                                     | 0.001                                                                               |                           |  |
| Final R indices                                                        | 3259 data; I > 2σ(I)                                                                | R1 = 0.0415, wR2 = 0.1020 |  |
|                                                                        | all data                                                                            | R1 = 0.0618, wR2 = 0.1129 |  |
| Weighting scheme                                                       | w=1/[σ <sup>2</sup> (F <sub>o</sub> <sup>2</sup> )+(0.0550P) <sup>2</sup> +0.3070P] |                           |  |
| where P=(F <sub>o</sub> <sup>2</sup> +2F <sub>c</sub> <sup>2</sup> )/3 | where P=(F <sub>o</sub> <sup>2</sup> +2F <sub>c</sub> <sup>2</sup> )/3              |                           |  |
| Extinction coefficient                                                 | 0.0130(20)                                                                          |                           |  |
| Largest diff. peak and hole                                            | 0.204 and -0.165 eÅ <sup>-3</sup>                                                   |                           |  |
| R.M.S. deviation from mean                                             | 0.043 eÅ <sup>-3</sup>                                                              |                           |  |

**Table S3. Atomic coordinates and equivalent isotropic atomic displacement parameters (Å<sup>2</sup>) for 4b**

U(eq) is defined as one third of the trace of the orthogonalized U<sub>ij</sub> tensor.

|    | x/a         | y/b         | z/c         | U(eq)       |
|----|-------------|-------------|-------------|-------------|
| S1 | 0.70747(5)  | 0.55696(5)  | 0.66047(4)  | 0.04270(16) |
| O1 | 0.94771(15) | 0.19371(13) | 0.29994(13) | 0.0555(4)   |
| N1 | 0.73645(15) | 0.42929(13) | 0.44736(11) | 0.0321(3)   |
| N2 | 0.87853(15) | 0.62633(14) | 0.50701(12) | 0.0369(3)   |
| N3 | 0.61172(17) | 0.24235(15) | 0.03504(12) | 0.0426(4)   |

|     |             |             |             |            |
|-----|-------------|-------------|-------------|------------|
| O2  | 0.57629(19) | 0.43988(16) | 0.15682(13) | 0.0774(5)  |
| C9  | 0.76521(18) | 0.32776(16) | 0.23701(14) | 0.0334(4)  |
| C8  | 0.79992(18) | 0.43712(16) | 0.35058(14) | 0.0327(4)  |
| C19 | 0.63339(18) | 0.34278(16) | 0.47412(14) | 0.0322(4)  |
| C7  | 0.88548(18) | 0.56059(16) | 0.38878(15) | 0.0351(4)  |
| C10 | 0.83664(18) | 0.21661(16) | 0.22020(15) | 0.0348(4)  |
| C24 | 0.60329(19) | 0.39910(16) | 0.58685(14) | 0.0354(4)  |
| C25 | 0.78641(18) | 0.54577(16) | 0.53654(14) | 0.0347(4)  |
| C16 | 0.67738(18) | 0.12481(17) | 0.01814(14) | 0.0360(4)  |
| C23 | 0.5001(2)   | 0.33370(18) | 0.62963(16) | 0.0405(4)  |
| C11 | 0.79131(18) | 0.10924(17) | 0.10928(15) | 0.0370(4)  |
| C20 | 0.56437(19) | 0.21684(17) | 0.40516(15) | 0.0383(4)  |
| C6  | 0.96878(19) | 0.62865(17) | 0.32164(16) | 0.0400(4)  |
| C22 | 0.4279(2)   | 0.20823(18) | 0.56056(17) | 0.0417(4)  |
| C17 | 0.6450(2)   | 0.34225(18) | 0.14346(16) | 0.0439(4)  |
| C21 | 0.4633(2)   | 0.15181(18) | 0.45016(16) | 0.0429(4)  |
| C15 | 0.6336(2)   | 0.02068(19) | 0.91099(16) | 0.0481(5)  |
| C26 | 0.3127(2)   | 0.1364(2)   | 0.6040(2)   | 0.0568(5)  |
| C1  | 0.0528(2)   | 0.7514(2)   | 0.3774(2)   | 0.0568(5)  |
| C12 | 0.8582(2)   | 0.9912(2)   | 0.09116(19) | 0.0589(6)  |
| C14 | 0.7020(3)   | 0.9065(2)   | 0.89550(19) | 0.0620(6)  |
| C18 | 0.5014(3)   | 0.2645(2)   | 0.93616(18) | 0.0693(7)  |
| C13 | 0.8146(3)   | 0.8908(2)   | 0.9848(2)   | 0.0712(7)  |
| C3  | 0.1207(3)   | 0.7666(3)   | 0.1955(2)   | 0.0717(7)  |
| C2  | 0.1268(3)   | 0.8187(3)   | 0.3145(2)   | 0.0717(7)  |
| C5  | 0.9641(3)   | 0.5777(2)   | 0.2002(2)   | 0.0825(9)  |
| C4  | 0.0392(4)   | 0.6462(3)   | 0.1385(2)   | 0.0979(10) |

---



**Table S4. Bond lengths (Å) for 4b**

|         |            |         |            |
|---------|------------|---------|------------|
| S1-C25  | 1.7329(18) | S1-C24  | 1.7609(18) |
| O1-C10  | 1.332(2)   | O1-H6   | 0.93(3)    |
| N1-C25  | 1.363(2)   | N1-C8   | 1.392(2)   |
| N1-C19  | 1.401(2)   | N2-C25  | 1.308(2)   |
| N2-C7   | 1.396(2)   | N3-C16  | 1.383(2)   |
| N3-C17  | 1.385(2)   | N3-C18  | 1.467(2)   |
| O2-C17  | 1.225(2)   | C9-C10  | 1.357(2)   |
| C9-C17  | 1.454(2)   | C9-C8   | 1.475(2)   |
| C8-C7   | 1.378(2)   | C19-C20 | 1.384(2)   |
| C19-C24 | 1.393(2)   | C7-C6   | 1.466(3)   |
| C10-C11 | 1.447(2)   | C24-C23 | 1.381(3)   |
| C16-C15 | 1.400(2)   | C16-C11 | 1.403(2)   |
| C23-C22 | 1.389(3)   | C23-H19 | 0.93       |
| C11-C12 | 1.395(3)   | C20-C21 | 1.380(3)   |
| C20-H14 | 0.93       | C6-C5   | 1.376(3)   |
| C6-C1   | 1.378(3)   | C22-C21 | 1.390(3)   |
| C22-C26 | 1.505(3)   | C21-H15 | 0.93       |
| C15-C14 | 1.367(3)   | C15-H10 | 0.93       |
| C26-H16 | 0.96       | C26-H18 | 0.96       |
| C26-H17 | 0.96       | C1-C2   | 1.373(3)   |
| C1-H1   | 0.93       | C12-C13 | 1.374(3)   |
| C12-H7  | 0.93       | C14-C13 | 1.382(3)   |
| C14-H9  | 0.93       | C18-H12 | 0.96       |
| C18-H11 | 0.96       | C18-H13 | 0.96       |
| C13-H8  | 0.93       | C3-C2   | 1.348(3)   |
| C3-C4   | 1.352(4)   | C3-H3   | 0.93       |
| C2-H2   | 0.93       | C5-C4   | 1.375(3)   |
| C5-H5   | 0.93       | C4-H4   | 0.93       |

**Table S5. Bond angles (°) for 4b**

|             |            |             |            |
|-------------|------------|-------------|------------|
| C25-S1-C24  | 89.52(8)   | C10-O1-H6   | 118.7(15)  |
| C25-N1-C8   | 107.06(14) | C25-N1-C19  | 114.22(14) |
| C8-N1-C19   | 138.56(13) | C25-N2-C7   | 104.87(13) |
| C16-N3-C17  | 122.54(15) | C16-N3-C18  | 120.01(15) |
| C17-N3-C18  | 117.45(16) | C10-C9-C17  | 120.79(15) |
| C10-C9-C8   | 122.88(15) | C17-C9-C8   | 116.30(14) |
| C7-C8-N1    | 104.79(14) | C7-C8-C9    | 134.23(16) |
| N1-C8-C9    | 120.95(14) | C20-C19-C24 | 120.22(16) |
| C20-C19-N1  | 128.78(15) | C24-C19-N1  | 111.00(14) |
| C8-C7-N2    | 110.55(15) | C8-C7-C6    | 129.45(16) |
| N2-C7-C6    | 119.88(15) | O1-C10-C9   | 125.45(15) |
| O1-C10-C11  | 114.50(15) | C9-C10-C11  | 120.04(15) |
| C23-C24-C19 | 120.97(16) | C23-C24-S1  | 126.58(13) |
| C19-C24-S1  | 112.44(13) | N2-C25-N1   | 112.68(15) |
| N2-C25-S1   | 134.45(13) | N1-C25-S1   | 112.80(13) |
| N3-C16-C15  | 121.41(16) | N3-C16-C11  | 119.72(14) |
| C15-C16-C11 | 118.88(17) | C24-C23-C22 | 119.49(16) |
| C24-C23-H19 | 120.3      | C22-C23-H19 | 120.3      |
| C12-C11-C16 | 119.46(16) | C12-C11-C10 | 121.54(17) |
| C16-C11-C10 | 119.00(15) | C21-C20-C19 | 118.03(16) |
| C21-C20-H14 | 121.0      | C19-C20-H14 | 121.0      |
| C5-C6-C1    | 116.31(19) | C5-C6-C7    | 122.76(18) |
| C1-C6-C7    | 120.89(17) | C23-C22-C21 | 118.55(17) |
| C23-C22-C26 | 120.44(17) | C21-C22-C26 | 121.00(18) |
| O2-C17-N3   | 120.01(16) | O2-C17-C9   | 122.40(16) |
| N3-C17-C9   | 117.56(15) | C20-C21-C22 | 122.67(17) |
| C20-C21-H15 | 118.7      | C22-C21-H15 | 118.7      |
| C14-C15-C16 | 120.32(19) | C14-C15-H10 | 119.8      |
| C16-C15-H10 | 119.8      | C22-C26-H16 | 109.5      |

|             |          |             |            |
|-------------|----------|-------------|------------|
| C22-C26-H18 | 109.5    | H16-C26-H18 | 109.5      |
| C22-C26-H17 | 109.5    | H16-C26-H17 | 109.5      |
| H18-C26-H17 | 109.5    | C2-C1-C6    | 121.5(2)   |
| C2-C1-H1    | 119.3    | C6-C1-H1    | 119.3      |
| C13-C12-C11 | 120.7(2) | C13-C12-H7  | 119.6      |
| C11-C12-H7  | 119.6    | C15-C14-C13 | 121.05(18) |
| C15-C14-H9  | 119.5    | C13-C14-H9  | 119.5      |
| N3-C18-H12  | 109.5    | N3-C18-H11  | 109.5      |
| H12-C18-H11 | 109.5    | N3-C18-H13  | 109.5      |
| H12-C18-H13 | 109.5    | H11-C18-H13 | 109.5      |
| C12-C13-C14 | 119.6(2) | C12-C13-H8  | 120.2      |
| C14-C13-H8  | 120.2    | C2-C3-C4    | 118.6(2)   |
| C2-C3-H3    | 120.7    | C4-C3-H3    | 120.7      |
| C3-C2-C1    | 121.1(2) | C3-C2-H2    | 119.4      |
| C1-C2-H2    | 119.4    | C4-C5-C6    | 121.5(2)   |
| C4-C5-H5    | 119.2    | C6-C5-H5    | 119.2      |
| C3-C4-C5    | 120.9(2) | C3-C4-H4    | 119.5      |
| C5-C4-H4    | 119.5    |             |            |

**Table S6. Torsion angles (°) for 4b**

|                |             |               |             |
|----------------|-------------|---------------|-------------|
| C25-N1-C8-C7   | -0.10(17)   | C19-N1-C8-C7  | 174.87(17)  |
| C25-N1-C8-C9   | -178.33(14) | C19-N1-C8-C9  | -3.4(3)     |
| C10-C9-C8-C7   | 96.4(2)     | C17-C9-C8-C7  | -85.8(2)    |
| C10-C9-C8-N1   | -86.0(2)    | C17-C9-C8-N1  | 91.83(19)   |
| C25-N1-C19-C20 | -178.43(16) | C8-N1-C19-C20 | 6.8(3)      |
| C25-N1-C19-C24 | 1.43(19)    | C8-N1-C19-C24 | -173.30(17) |
| N1-C8-C7-N2    | 1.47(18)    | C9-C8-C7-N2   | 179.35(17)  |
| N1-C8-C7-C6    | -174.49(16) | C9-C8-C7-C6   | 3.4(3)      |
| C25-N2-C7-C8   | -2.30(18)   | C25-N2-C7-C6  | 174.10(15)  |

|                 |             |                 |             |
|-----------------|-------------|-----------------|-------------|
| C17-C9-C10-O1   | 180.00(17)  | C8-C9-C10-O1    | -2.3(3)     |
| C17-C9-C10-C11  | -1.4(3)     | C8-C9-C10-C11   | 176.29(15)  |
| C20-C19-C24-C23 | -2.8(2)     | N1-C19-C24-C23  | 177.30(14)  |
| C20-C19-C24-S1  | 178.12(13)  | N1-C19-C24-S1   | -1.76(17)   |
| C25-S1-C24-C23  | -177.72(16) | C25-S1-C24-C19  | 1.28(13)    |
| C7-N2-C25-N1    | 2.25(18)    | C7-N2-C25-S1    | -174.27(14) |
| C8-N1-C25-N2    | -1.41(19)   | C19-N1-C25-N2   | -177.77(13) |
| C8-N1-C25-S1    | 175.90(10)  | C19-N1-C25-S1   | -0.46(17)   |
| C24-S1-C25-N2   | 176.05(18)  | C24-S1-C25-N1   | -0.47(12)   |
| C17-N3-C16-C15  | 174.89(17)  | C18-N3-C16-C15  | -4.7(3)     |
| C17-N3-C16-C11  | -5.8(3)     | C18-N3-C16-C11  | 174.66(18)  |
| C19-C24-C23-C22 | 1.7(2)      | S1-C24-C23-C22  | -179.40(13) |
| N3-C16-C11-C12  | -179.27(17) | C15-C16-C11-C12 | 0.1(3)      |
| N3-C16-C11-C10  | 0.7(3)      | C15-C16-C11-C10 | -179.90(16) |
| O1-C10-C11-C12  | 1.5(3)      | C9-C10-C11-C12  | -177.24(18) |
| O1-C10-C11-C16  | -178.52(15) | C9-C10-C11-C16  | 2.8(3)      |
| C24-C19-C20-C21 | 1.7(2)      | N1-C19-C20-C21  | -178.46(15) |
| C8-C7-C6-C5     | 4.6(3)      | N2-C7-C6-C5     | -171.0(2)   |
| C8-C7-C6-C1     | -177.76(18) | N2-C7-C6-C1     | 6.6(3)      |
| C24-C23-C22-C21 | 0.5(3)      | C24-C23-C22-C26 | -178.66(16) |
| C16-N3-C17-O2   | -174.65(18) | C18-N3-C17-O2   | 4.9(3)      |
| C16-N3-C17-C9   | 7.0(3)      | C18-N3-C17-C9   | -173.43(18) |
| C10-C9-C17-O2   | 178.38(19)  | C8-C9-C17-O2    | 0.5(3)      |
| C10-C9-C17-N3   | -3.3(3)     | C8-C9-C17-N3    | 178.84(16)  |
| C19-C20-C21-C22 | 0.5(3)      | C23-C22-C21-C20 | -1.6(3)     |
| C26-C22-C21-C20 | 177.53(17)  | N3-C16-C15-C14  | 178.79(18)  |
| C11-C16-C15-C14 | -0.6(3)     | C5-C6-C1-C2     | 0.3(3)      |
| C7-C6-C1-C2     | -177.43(19) | C16-C11-C12-C13 | 0.6(3)      |
| C10-C11-C12-C13 | -179.4(2)   | C16-C15-C14-C13 | 0.4(3)      |
| C11-C12-C13-C14 | -0.8(4)     | C15-C14-C13-C12 | 0.3(4)      |

|             |         |             |          |
|-------------|---------|-------------|----------|
| C4-C3-C2-C1 | 0.3(4)  | C6-C1-C2-C3 | -0.4(4)  |
| C1-C6-C5-C4 | -0.1(4) | C7-C6-C5-C4 | 177.6(3) |
| C2-C3-C4-C5 | -0.2(5) | C6-C5-C4-C3 | 0.1(5)   |

**Table S7. Anisotropic atomic displacement parameters (Å<sup>2</sup>) for 4b**

The anisotropic atomic displacement factor exponent takes the form:  $-2\pi^2 [ h^2 a^{*2} U_{11} + \dots + 2 h k a^* b^* U_{12} ]$

|     | U11        | U22        | U33        | U23              | U13        | U12        |
|-----|------------|------------|------------|------------------|------------|------------|
| S1  | 0.0575(3)  | 0.0363(3)  | 0.0266(2)  | -<br>0.00369(18) | 0.0059(2)  | 0.0065(2)  |
| O1  | 0.0582(8)  | 0.0386(8)  | 0.0478(8)  | -0.0084(6)       | -0.0171(7) | 0.0128(6)  |
| N1  | 0.0408(8)  | 0.0264(7)  | 0.0235(7)  | 0.0002(5)        | 0.0014(6)  | 0.0046(6)  |
| N2  | 0.0432(8)  | 0.0300(7)  | 0.0292(7)  | 0.0001(6)        | -0.0014(6) | 0.0041(7)  |
| N3  | 0.0530(9)  | 0.0413(9)  | 0.0256(7)  | 0.0022(6)        | -0.0013(6) | 0.0052(7)  |
| O2  | 0.0955(12) | 0.0663(10) | 0.0486(9)  | -0.0099(7)       | -0.0161(8) | 0.0457(9)  |
| C9  | 0.0406(9)  | 0.0312(9)  | 0.0243(8)  | 0.0014(7)        | 0.0062(7)  | 0.0008(7)  |
| C8  | 0.0400(9)  | 0.0303(9)  | 0.0249(8)  | 0.0036(7)        | 0.0034(7)  | 0.0069(7)  |
| C19 | 0.0378(9)  | 0.0294(9)  | 0.0263(8)  | 0.0043(7)        | 0.0017(7)  | 0.0083(7)  |
| C7  | 0.0397(9)  | 0.0296(9)  | 0.0306(8)  | 0.0031(7)        | 0.0001(7)  | 0.0068(7)  |
| C10 | 0.0369(9)  | 0.0324(9)  | 0.0305(8)  | 0.0038(7)        | 0.0039(7)  | 0.0001(7)  |
| C24 | 0.0438(9)  | 0.0321(9)  | 0.0279(8)  | 0.0053(7)        | 0.0029(7)  | 0.0112(8)  |
| C25 | 0.0421(9)  | 0.0300(9)  | 0.0241(8)  | -0.0005(7)       | -0.0026(7) | 0.0069(8)  |
| C16 | 0.0415(9)  | 0.0349(9)  | 0.0283(8)  | 0.0026(7)        | 0.0101(7)  | -0.0046(8) |
| C23 | 0.0526(11) | 0.0403(10) | 0.0316(9)  | 0.0103(8)        | 0.0111(8)  | 0.0173(9)  |
| C11 | 0.0400(9)  | 0.0308(9)  | 0.0337(9)  | -0.0012(7)       | 0.0071(8)  | -0.0012(7) |
| C20 | 0.0465(10) | 0.0338(9)  | 0.0301(9)  | 0.0017(7)        | 0.0062(8)  | 0.0058(8)  |
| C6  | 0.0419(10) | 0.0348(9)  | 0.0425(10) | 0.0107(8)        | 0.0062(8)  | 0.0063(8)  |
| C22 | 0.0440(10) | 0.0419(10) | 0.0432(10) | 0.0156(8)        | 0.0105(8)  | 0.0128(8)  |
| C17 | 0.0554(11) | 0.0410(10) | 0.0291(9)  | 0.0013(8)        | 0.0029(8)  | 0.0113(9)  |
| C21 | 0.0477(10) | 0.0335(10) | 0.0429(10) | 0.0046(8)        | 0.0071(9)  | 0.0014(8)  |
| C15 | 0.0570(12) | 0.0460(11) | 0.0308(9)  | -0.0024(8)       | 0.0048(9)  | -0.0060(9) |
| C26 | 0.0607(13) | 0.0550(13) | 0.0614(13) | 0.0192(10)       | 0.0234(11) | 0.0102(10) |

|     |            |            |            |             |             |             |
|-----|------------|------------|------------|-------------|-------------|-------------|
| C1  | 0.0525(12) | 0.0573(13) | 0.0521(12) | 0.0093(10)  | 0.0044(10)  | -0.0113(10) |
| C12 | 0.0589(12) | 0.0430(12) | 0.0572(13) | -0.0088(10) | -0.0028(10) | 0.0126(10)  |
| C14 | 0.0755(15) | 0.0454(12) | 0.0464(12) | -0.0153(10) | 0.0075(11)  | -0.0024(11) |
| C18 | 0.0865(16) | 0.0681(15) | 0.0368(11) | 0.0031(10)  | -0.0155(11) | 0.0201(13)  |
| C13 | 0.0788(16) | 0.0434(12) | 0.0683(15) | -0.0187(11) | 0.0006(13)  | 0.0162(11)  |
| C3  | 0.0789(16) | 0.0657(16) | 0.0828(18) | 0.0303(14)  | 0.0366(14)  | -0.0003(13) |
| C2  | 0.0641(14) | 0.0654(15) | 0.0772(17) | 0.0158(13)  | 0.0103(13)  | -0.0236(12) |
| C5  | 0.139(2)   | 0.0491(13) | 0.0545(14) | -0.0002(11) | 0.0404(15)  | -0.0235(15) |
| C4  | 0.164(3)   | 0.0669(17) | 0.0666(17) | 0.0062(14)  | 0.0605(19)  | -0.0165(19) |

**Table S8. Hydrogen atomic coordinates and isotropic atomic displacement parameters ( $\text{\AA}^2$ ) for 4b**

|     | x/a    | y/b     | z/c     | U(eq) |
|-----|--------|---------|---------|-------|
| H19 | 0.4790 | 0.3733  | 0.7041  | 0.049 |
| H14 | 0.5855 | 0.1772  | 0.3307  | 0.046 |
| H15 | 0.4169 | 0.0668  | 0.4048  | 0.052 |
| H10 | 0.5576 | 0.0292  | -0.1499 | 0.058 |
| H16 | 0.2227 | 0.1177  | 0.5442  | 0.085 |
| H18 | 0.2982 | 0.1927  | 0.6787  | 0.085 |
| H17 | 0.3436 | 0.0531  | 0.6170  | 0.085 |
| H1  | 1.0595 | 0.7895  | 0.4596  | 0.068 |
| H7  | 0.9332 | -0.0198 | 0.1517  | 0.071 |
| H9  | 0.6722 | -0.1617 | -0.1763 | 0.074 |
| H12 | 0.4180 | 0.1975  | -0.0825 | 0.104 |
| H11 | 0.5419 | 0.2573  | -0.1343 | 0.104 |
| H13 | 0.4722 | 0.3529  | -0.0394 | 0.104 |
| H8  | 0.8606 | -0.1872 | -0.0270 | 0.085 |
| H3  | 1.1715 | 0.8125  | 0.1534  | 0.086 |
| H2  | 1.1820 | 0.9017  | 0.3546  | 0.086 |
| H5  | 0.9090 | 0.4950  | 0.1589  | 0.099 |
| H4  | 1.0338 | 0.6092  | 0.0564  | 0.117 |

---

|    |          |          |          |          |
|----|----------|----------|----------|----------|
| H6 | 0.990(3) | 0.263(3) | 0.368(2) | 0.086(8) |
|----|----------|----------|----------|----------|

---

**Table S9. Hydrogen bond distances (Å) and angles (°) for 4b**

---

| Atoms        | Donor-H | Acceptor-H | Donor-Acceptor | Angle   |
|--------------|---------|------------|----------------|---------|
| O1-H6...N2   | 0.93(3) | 1.80(3)    | 2.6969(18)     | 162.(2) |
| C23-H19...O2 | 0.93    | 2.35       | 3.198(2)       | 151.2   |

---
